# Supplementary material for: Strain induced reactivity of cyclic iminoboranes: the (2 + 2) cycloaddition of a 1H-1,3,2-diazaborepine with ethene
Source: Royal Society of Chemistry journal article supplement (doi:10.1039/d3sc04901a), 2023-12-12
Supplement: d3sc04901a1.pdf [file d3sc04901a1.pdf]

# Electronic Supporting Information

## Strain induced reactivity of cyclic iminoboranes: The (2 + 2) cycloaddition of a 1-*H*-1,3,2-diazaborepine with ethene

Divanshu Gupta, Ralf Einholz, Holger F. Bettinger\*

*Institut für Organische Chemie, Universität Tübingen, Auf der Morgenstelle 18, 72076  
Tübingen, Germany*

\*E-mail: holger.bettinger@uni-tuebingen.de

## Contents

|                                                                                                              |     |
|--------------------------------------------------------------------------------------------------------------|-----|
| • Experimental and Computational Details                                                                     | S3  |
| • Spectra (NMR, MS, UV-Vis and IR) and plots                                                                 | S7  |
| • Relative ZPVE Energies for the Reaction of <b>2</b> with CO                                                | S18 |
| • Relative Free Energies ( $\Delta G$ ) for the Reaction of <b>2</b> with CO                                 | S18 |
| • Relative ZPVE Energies for the Reaction of <b>2</b> with C <sub>2</sub> H <sub>4</sub>                     | S19 |
| • Relative Free Energies ( $\Delta G$ ) for the Reaction of <b>2</b> with C <sub>2</sub> H <sub>4</sub>      | S19 |
| • Isodesmic Reaction for Determining Lewis Acidity of <b>1</b> and <b>2</b>                                  | S20 |
| • CASSCF Calculation to Understand the Ring Enlargement Process                                              | S23 |
| • Intrinsic Reaction Coordinate (IRC) Path of the Reactions                                                  | S26 |
| • NBO Analysis and NBO plots of Complex <b>5_comp</b>                                                        | S29 |
| • Experimental and Computed Vibrational Frequencies of <b>3</b> in Ar Matrix                                 | S30 |
| • Experimental and Computed Vibrational Frequencies of <b>2</b> in Ar Matrix                                 | S32 |
| • Experimental and Computed Vibrational Frequencies of <b>4</b> in Ar Matrix                                 | S33 |
| • Experimental and Computed Vibrational Frequencies of <sup>13</sup> CO - <b>4</b> in Ar Matrix              | S34 |
| • Experimental and Computed Vibrational Frequencies of C <sup>18</sup> O - <b>4</b> in Ar Matrix             | S35 |
| • Experimental and Computed Isotopic Shifts of <b>4</b> in Ar Matrix                                         | S36 |
| • Experimental and Computed Vibrational Frequencies of <b>5</b> in Ar Matrix                                 | S36 |
| • Experimental and Computed Vibrational Frequencies of C <sub>2</sub> D <sub>4</sub> - <b>5</b> in Ar Matrix | S37 |
| • Experimental and Computed Isotopic Shifts of <b>5</b> in Ar Matrix                                         | S39 |
| • Cartesian Coordinates of Stationary Points                                                                 | S40 |
| • References                                                                                                 | S70 |

## Experimental and Computational Details

**General Procedure.** All experiments were performed under anhydrous conditions using argon as protective gas. All commercially available compounds and dry solvents were purchased.  $^1\text{H}$  and  $^{13}\text{C}$  NMR spectra were referenced to tetramethylsilane,  $^{11}\text{B}$  NMR spectra were referenced externally to  $\text{BF}_3\cdot\text{OEt}_2$ .  $^1\text{H}$  and  $^{13}\text{C}$  spectra were calibrated to residual solvent signals. NMR spectra were recorded on a Bruker Avance III+ 400 spectrometer. MSD 5977 (Agilent) with DIP (SIM) was used for recording EI-MS. 1-(*Tert*-butyldimethylsilyl)-2-chloro-1,2-dihydro-1,2-azaborine and azidotrimethylsilane were purchased from abcr (Article ID AB541736 (now discontinued)) and AlfaAesar (Stock No. L00173), respectively.

## Synthesis

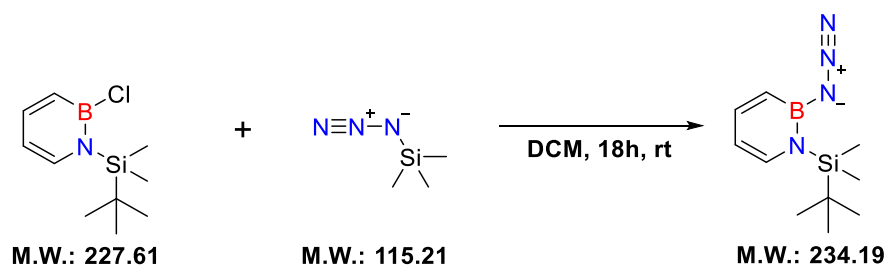

The reaction was conducted in a glove box under argon atmosphere. In a J-Young-NMR tube a solution of 45,4mg (0,2 mmol) 1-(*tert*-butyldimethylsilyl)-2-chloro-1,2-dihydro-1,2-azaborine in 0.5 mL deuterated dichloromethane was prepared. To this a solution of 23 mg (0.2 mmol) azidotrimethylsilane in 0.5 mL deuterated dichloromethane was added slowly by syringe. The progress of the reaction was monitored by NMR spectroscopy. After 18 h at room temperature all volatiles were removed under vacuum. 1-(*tert*-

butyldimethylsilyl)-2-azido-1,2-dihydro-1,2-azaborine remained and was used in all experiments without additional purification.

**<sup>1</sup>H-NMR:** 400 MHz, CD<sub>2</sub>Cl<sub>2</sub>: 7.61 (1H, m), 7.15 (1H, m), 6.62 (1H, m), 6.19 (1H, m), 0.92 (9H, s), 0.47 (6H, s).

**<sup>11</sup>B{<sup>1</sup>H}-NMR:** 128 MHz, CD<sub>2</sub>Cl<sub>2</sub>: 31.9.

**<sup>13</sup>C{<sup>1</sup>H}-NMR:** 101 MHz, CD<sub>2</sub>Cl<sub>2</sub>: 146.3, 138.6, 121.5 (determined by 2D-NMR), 110.6, 26.6, 19.0, -2.8.

**EI-MS:** m/z (Int.%): 234.2 (25) M<sup>+</sup>, 177.1 (26) [M-C(CH<sub>3</sub>)<sub>3</sub>]<sup>+</sup>, 149.1 (100) [M-HC(CH<sub>3</sub>)<sub>3</sub>-N<sub>2</sub>]<sup>+</sup>;

**HRMS m/z:** With our available equipment, high resolution mass spectrometry cannot be performed for air and moisture sensitive compounds.

### Matrix Isolation Experimental Details

The precursor 1-(*tert*-butyldimethylsilyl)-2-azido-1,2-dihydro-1,2-azaborine **3** was sublimed from a glass flask at room temperature, and all gaseous materials leaving the flask were condensed onto a cold CsI window (for IR) or sapphire window (for UV-Vis) with a large excess of Argon 6.0 (Westfalen AG, 99.9999 %), or doped with 1-2 % of carbon monoxide 3.7 (Westfalen AG), C<sup>18</sup>O 2.0 (95 % <sup>18</sup>O) (Sigma Aldrich) or <sup>13</sup>CO 2.3 (99.1 % <sup>13</sup>C) (Westfalen AG) and 5 % of C<sub>2</sub>H<sub>4</sub> (Sigma-Aldrich, 99.95 %) or C<sub>2</sub>D<sub>4</sub> (Sigma-Aldrich, 99 %). The mixtures of these gases were dosed to 2.0 sccm by a mass flow controller (MKS mass flow PR400B). A Sumitomo SH-1 closed-cycle helium cryostat was

used to obtain the temperature as low as 4 - 7 K.<sup>1</sup> The infrared spectra in the range 400-4000 cm<sup>-1</sup> were obtained using a Bruker Vertex 70 FTIR spectrometer with a standard resolution of 0.5 cm<sup>-1</sup>, while electronic absorption spectra were measured using a Perkin Elmer Lambda 1050 spectrometer. For inducing photochemistry in the deposited matrix, a low-pressure mercury lamp ( $\lambda = 254$  nm, PenRay) and high-pressure mercury lamps (USHIO, USH-508S) were used. The combination of dichroic mirrors of required wavelength (420 - 630 nm) range along with a Schott cutoff filter (GG-435) was employed to obtain 435 nm >  $\lambda$  > 630 nm.

### Computational Details

All the structures were fully optimized using the M06-2X<sup>2</sup> global hybrid functional as well as B3LYP<sup>3,4</sup> hybrid exchange–correlation energy functional along with Grimme's<sup>5</sup> London dispersion correction with Becke-Johnson damping B3LYP-D3(BJ).<sup>3,4</sup> The 6-311+G(d,p) (split-valence triple- $\zeta$  with diffuse s and p functions for all atoms as well as d polarization functions on non-hydrogen atoms and p polarization functions for hydrogen)<sup>6</sup> basis set was adopted for all geometry optimizations. Harmonic vibrational frequencies were computed analytically which confirmed the nature of the stationary points as minima or first order saddle points (transition states) as well as to reproduce the simulated spectra of species **2-5** (including various isotopes). For identifying the combination bands and overtones, which were seen in addition to the fundamental bands in the experimental spectrum, anharmonic calculations were performed at B3LYP-D3(BJ)/6-311+G(d,p) level of theory using second-order vibrational perturbative approach.<sup>7-9</sup> Additionally, to reveal which minima are connected to the transition states, intrinsic reaction coordinate (IRC)<sup>10</sup>,

<sup>11</sup> paths were calculated at the different level of theories for each reaction (see SI). To refine the energies, single point calculations based on all the structures were performed using domain based local pair natural orbital (DLPNO) coupled cluster theory with single, double, and a perturbative estimate of triple excitation (DLPNO-CCSD(T))<sup>12-14</sup> in conjunction with Dunning's<sup>15, 16</sup> triple- $\zeta$  (cc-pVTZ) basis set as implemented in ORCA 5.0.<sup>17</sup> The DLPNO-CCSD(T) computations used TightPNO cutoff for increased accuracy and the frozen core approximation. All density functional theory calculations were performed with Gaussian 16.<sup>18</sup> The excitation spectra were calculated using time-dependent DFT (TD-DFT) with Gaussian 16 at CAM-B3LYP/6-311+G(d,p) level of theory.<sup>18, 19</sup> Natural bond orbital analysis was carried with the NBO 6.0 program using the M06-2X/6-311+G(d,p) geometries.<sup>20-23</sup> Magnetic shielding values were computed by employing the GIAO method<sup>24, 25</sup> at B3LYP/6-311+G(d,p)//M06-2X/6-311+G(d,p) level of theory. To determine the Lewis acidity of the compounds, isodesmic reactions were computed at SMD(DCM)<sup>26</sup>/MN15<sup>27</sup>/def2-TZVP<sup>28</sup> level of theory.

## Spectra

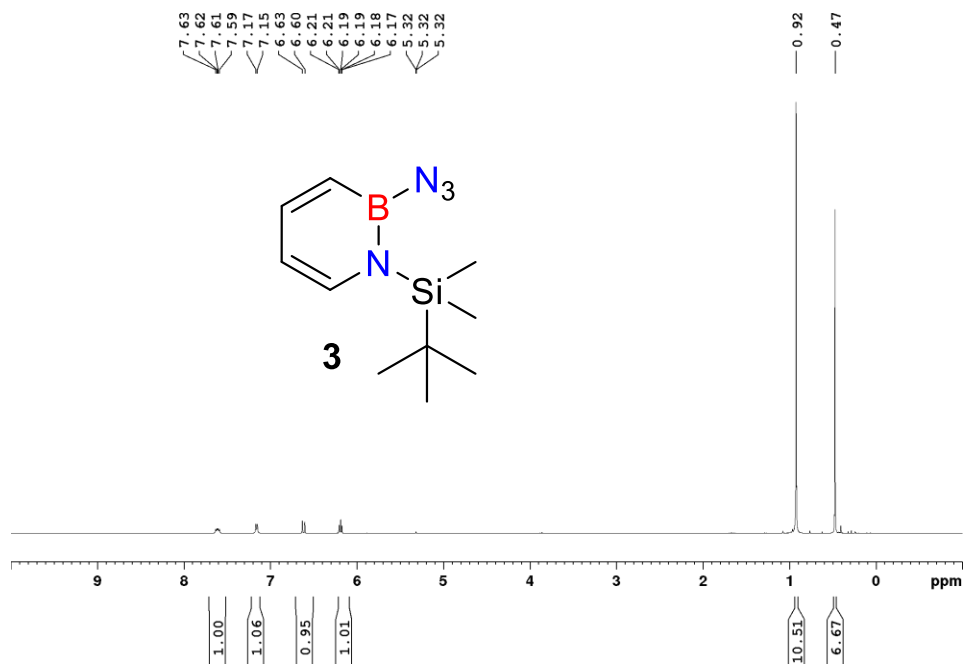

**Figure S1.** <sup>1</sup>H-NMR spectrum (400 MHz) of 1-(tert-butyldimethylsilyl)-2-azido-1,2-dihydro-1,2-azaborinine **3** in CD<sub>2</sub>Cl<sub>2</sub>.

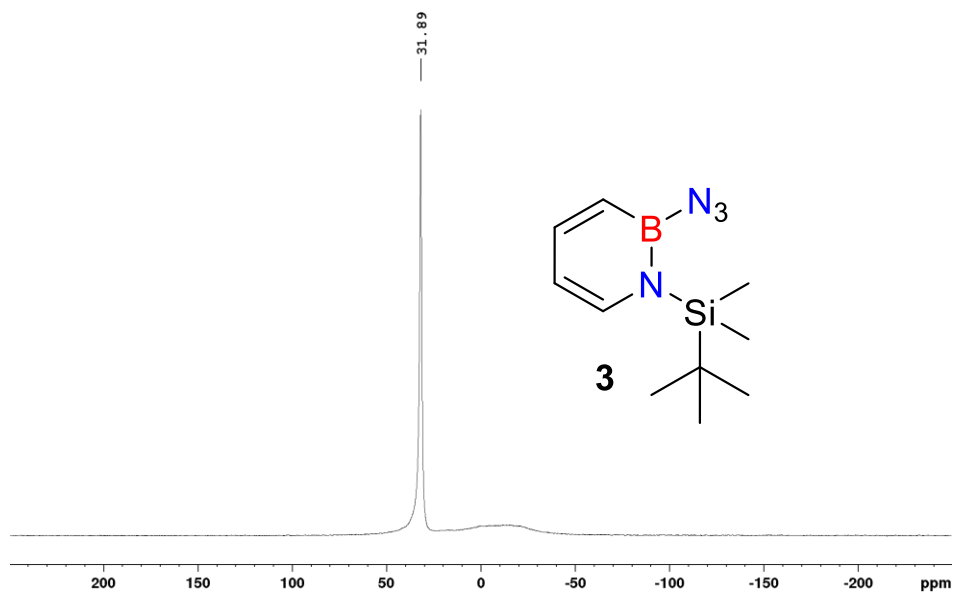

**Figure S2.** <sup>11</sup>B{<sup>13</sup>C}-NMR spectrum (128 MHz) of 1-(tert-butyldimethylsilyl)-2-azido-1,2-dihydro-1,2-azaborinine **3** in CD<sub>2</sub>Cl<sub>2</sub>.

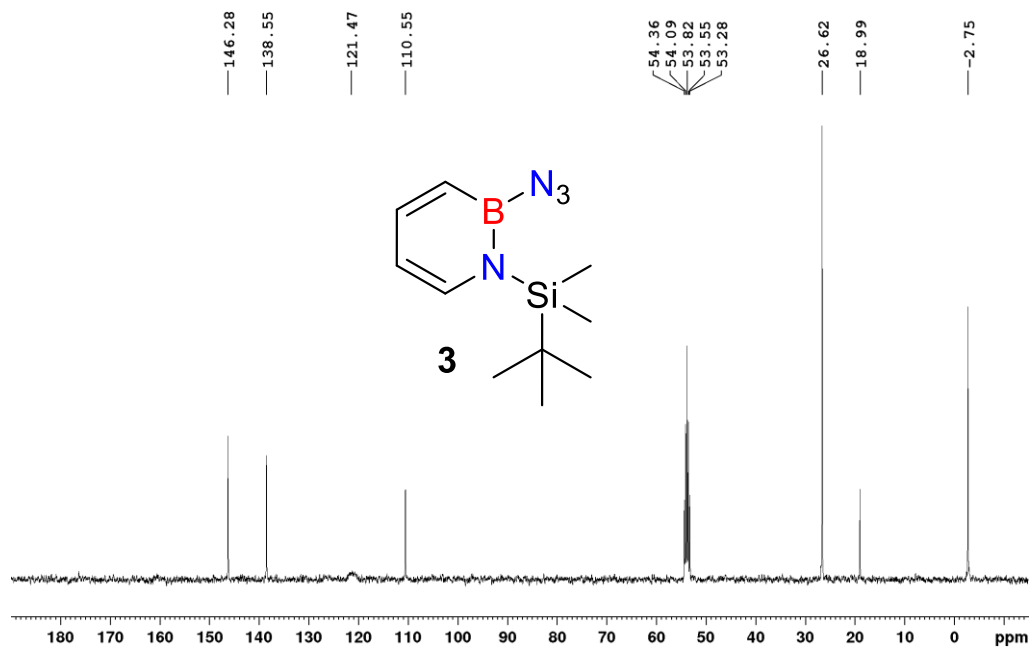

**Figure S3.**  $^{13}\text{C}\{^1\text{H}\}$ -NMR spectrum (101 MHz) of 1-(tert-butyldimethylsilyl)-2-azido-1,2-dihydro-1,2-azaborinine **3** in  $\text{CD}_2\text{Cl}_2$ .

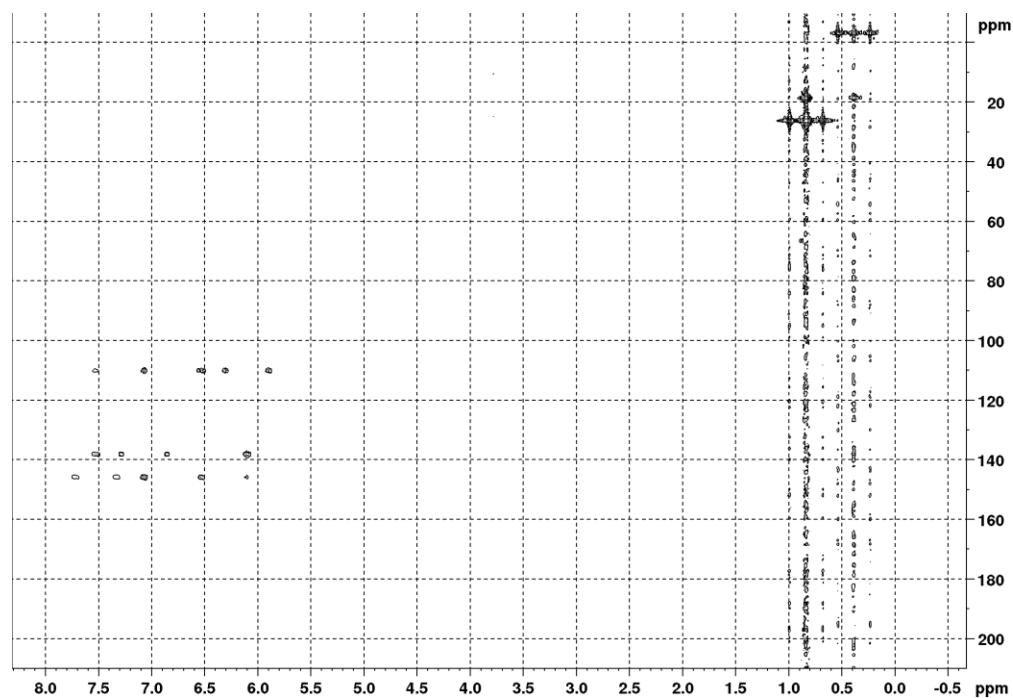

**Figure S4.** HMBC - NMR spectrum of 1-(tert-butyldimethylsilyl)-2-azido-1,2-dihydro-1,2-azaborinine **3** in  $\text{CD}_2\text{Cl}_2$ .



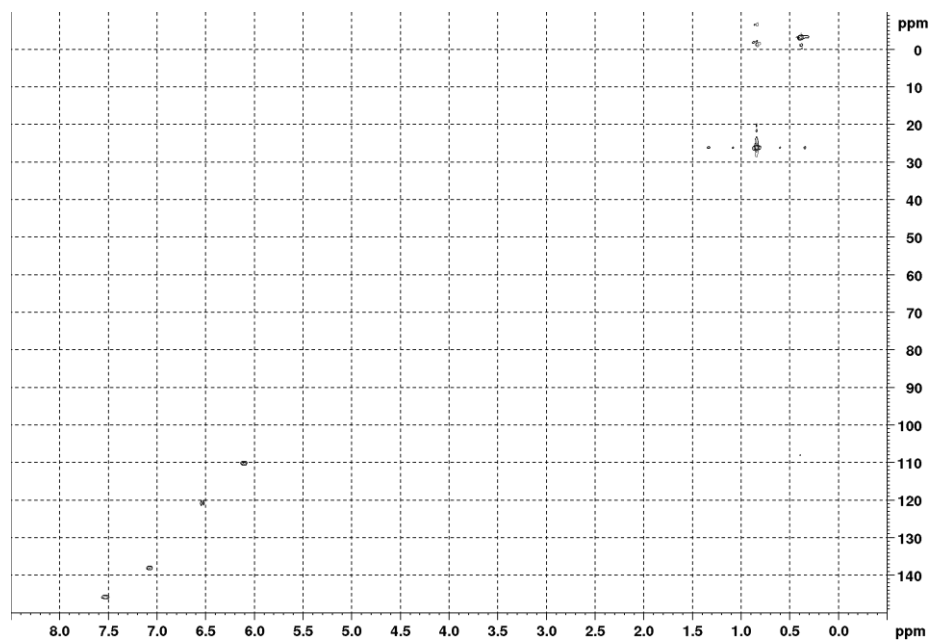

**Figure S5.** HSQC - NMR spectrum of 1-(tert-butyldimethylsilyl)-2-azido-1,2-dihydro-1,2-azaborinine **3** in CD<sub>2</sub>Cl<sub>2</sub>.

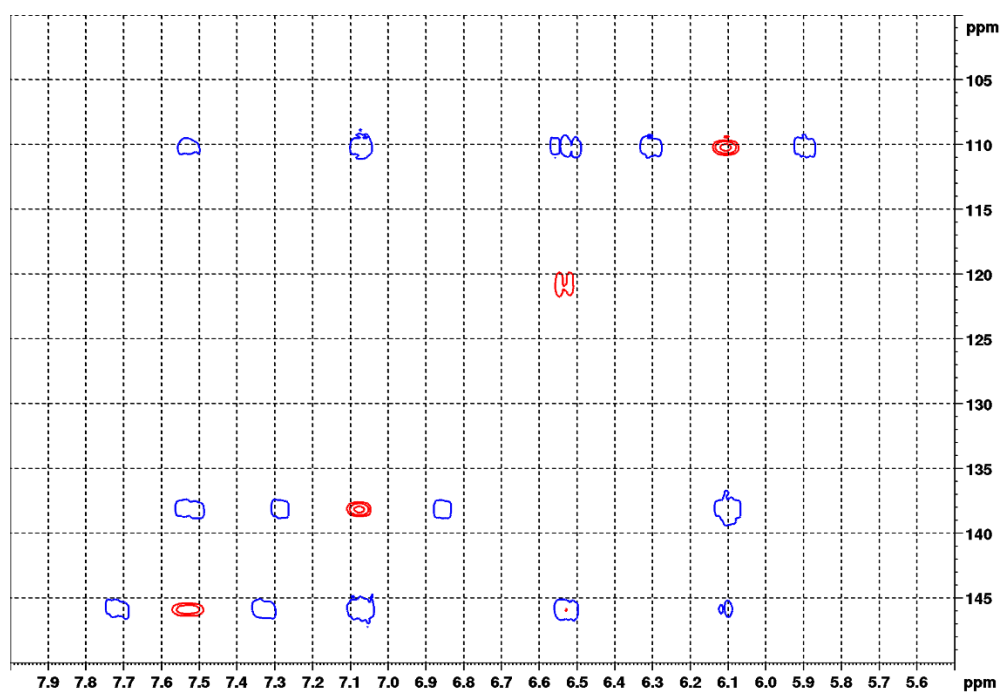

**Figure S6.** Overlapped **HMBC-NMR** and **HSQC-NMR** spectrum of 1-(tert-butyldimethylsilyl)-2-azido-1,2-dihydro-1,2-azaborinine **3** in CD<sub>2</sub>Cl<sub>2</sub>.

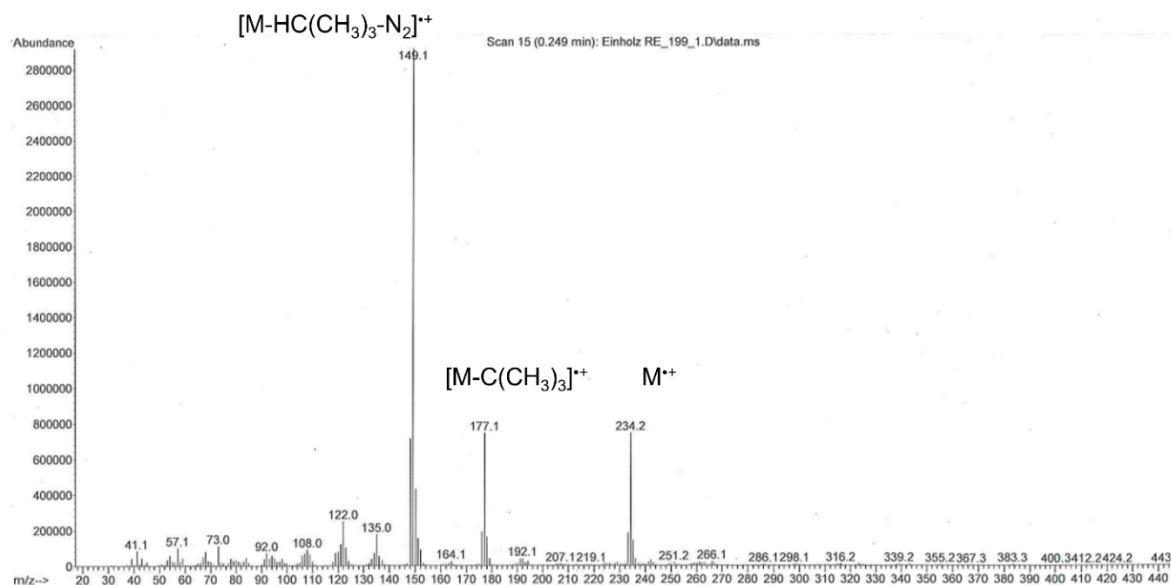

**Figure S7.** EI-MS spectrum of 1-(tert-butyldimethylsilyl)-2-azido-1,2-dihydro-1,2-azaborinine **3**.

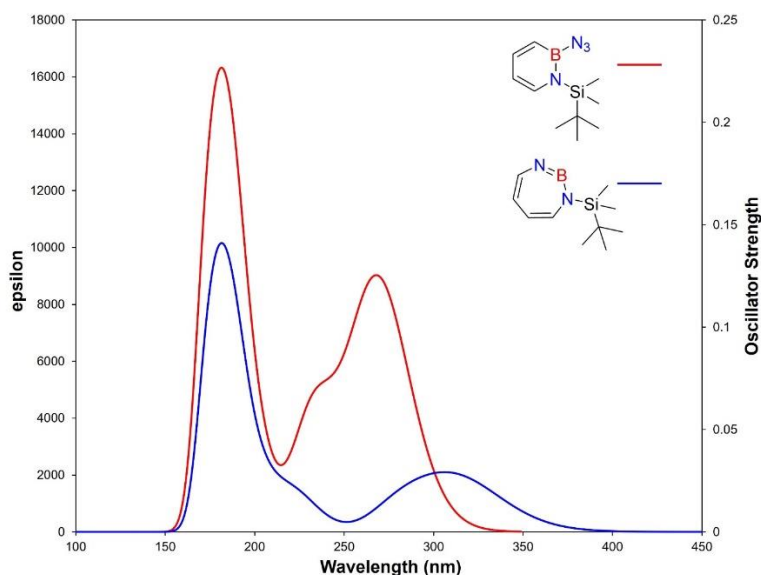

**Figure S8.** UV-Vis spectra of **3** (red) and **2** (blue) computed at TD-CAM-B3LYP/6-311+G(d,p) level of theory (half-width= 0.333 eV, first computed transition energy for **3** = 4.6 eV at  $\lambda_{\text{max}}$  = 269 nm, oscillator strength = 0.2157; first computed transition energy for **2** = 3.9 eV at  $\lambda_{\text{max}}$  = 317 nm, oscillator strength = 0.0403).

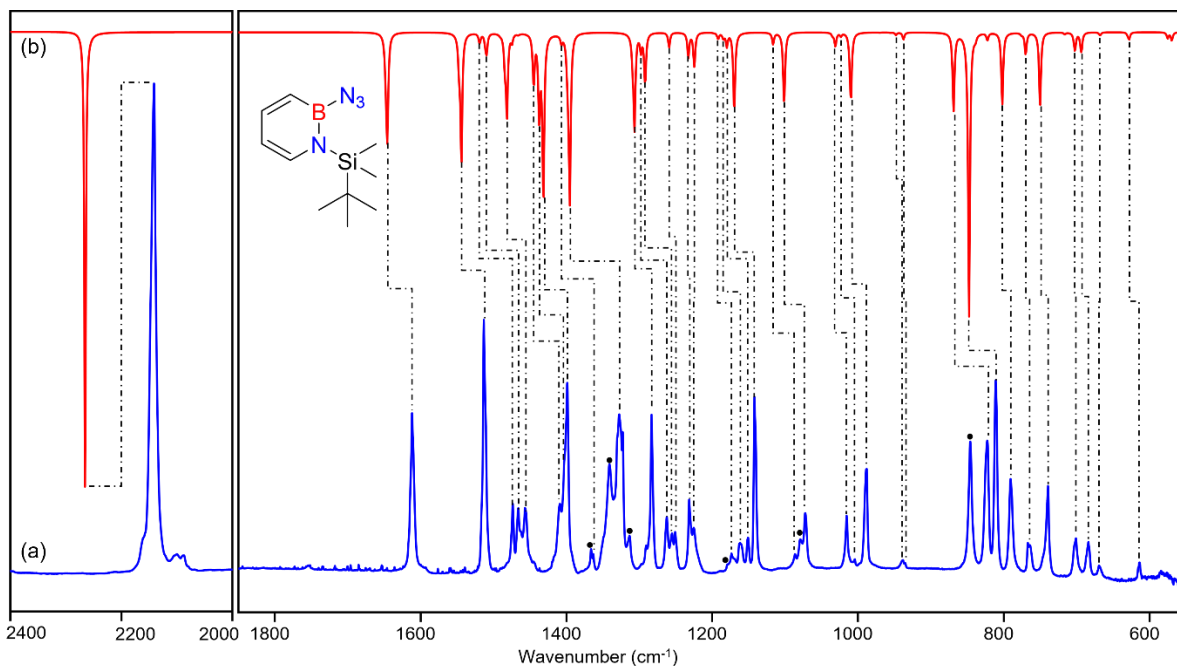

**Figure S9.** a) IR spectrum obtained after deposition of **3** in Ar matrix at 28 K. b) Spectrum for  $^{11}\text{B}$  and  $^{10}\text{B}$  isotopologues (81:19) of **3** calculated at the B3LYP-D3(BJ)/6–311+G(d,p) level of theory. (● corresponds to the overtones and combination bands (Table S9)).

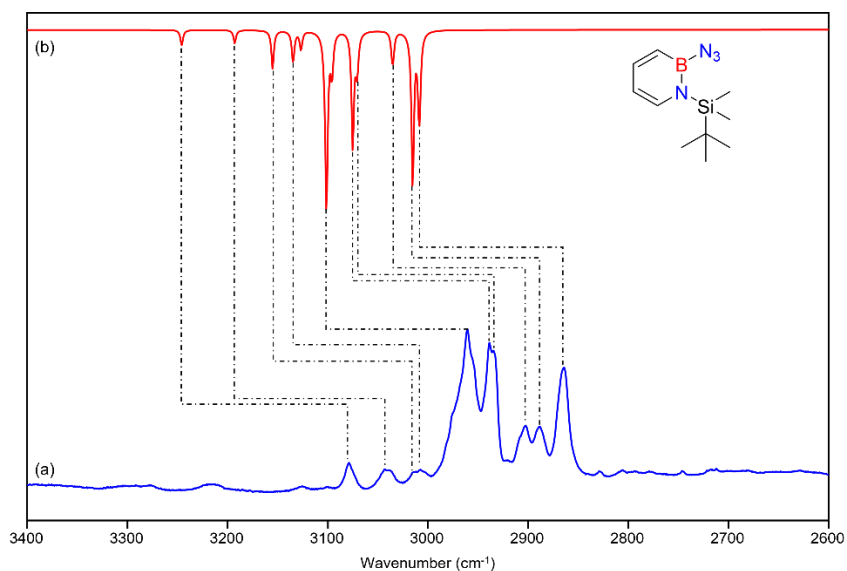

**Figure S10.** a) IR spectrum obtained after deposition of **3** in Ar matrix at 28 K. b) Spectrum for  $^{11}\text{B}$  and  $^{10}\text{B}$  isotopologues (81:19) of **3** calculated at the B3LYP-D3(BJ)/6–311+G(d,p) level of theory.

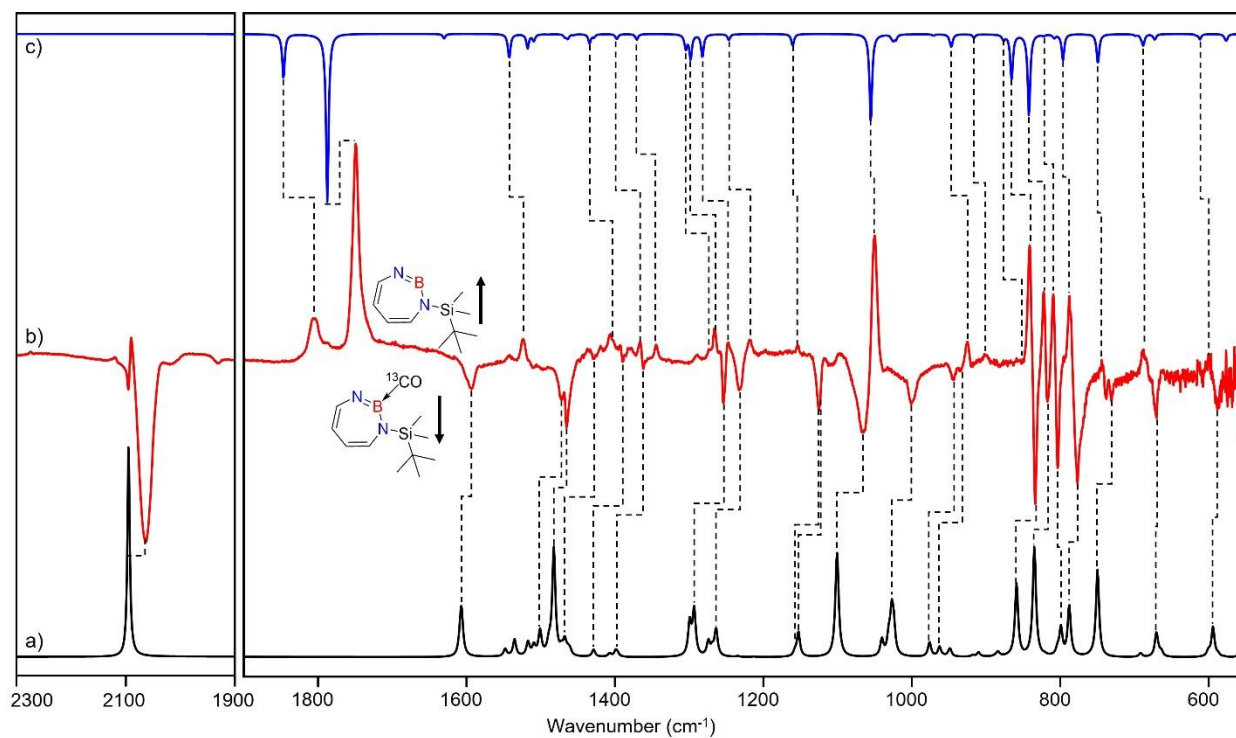

**Figure S11.** a) Spectrum for  $^{11}\text{B}$  and  $^{10}\text{B}$  (81:19) and  $^{13}\text{CO}$  isotopologues of **4** calculated at the B3LYP-D3(BJ)/6–311+G(d,p) level of theory. b) Difference IR spectrum after irradiation with  $435\text{ nm} > \lambda > 620\text{ nm}$  for 30 min (following the annealing step). c) Spectrum for  $^{11}\text{B}$  and  $^{10}\text{B}$  isotopologues (81:19) of **2** calculated at the B3LYP-D3(BJ)/6–311+G(d,p) level of theory.

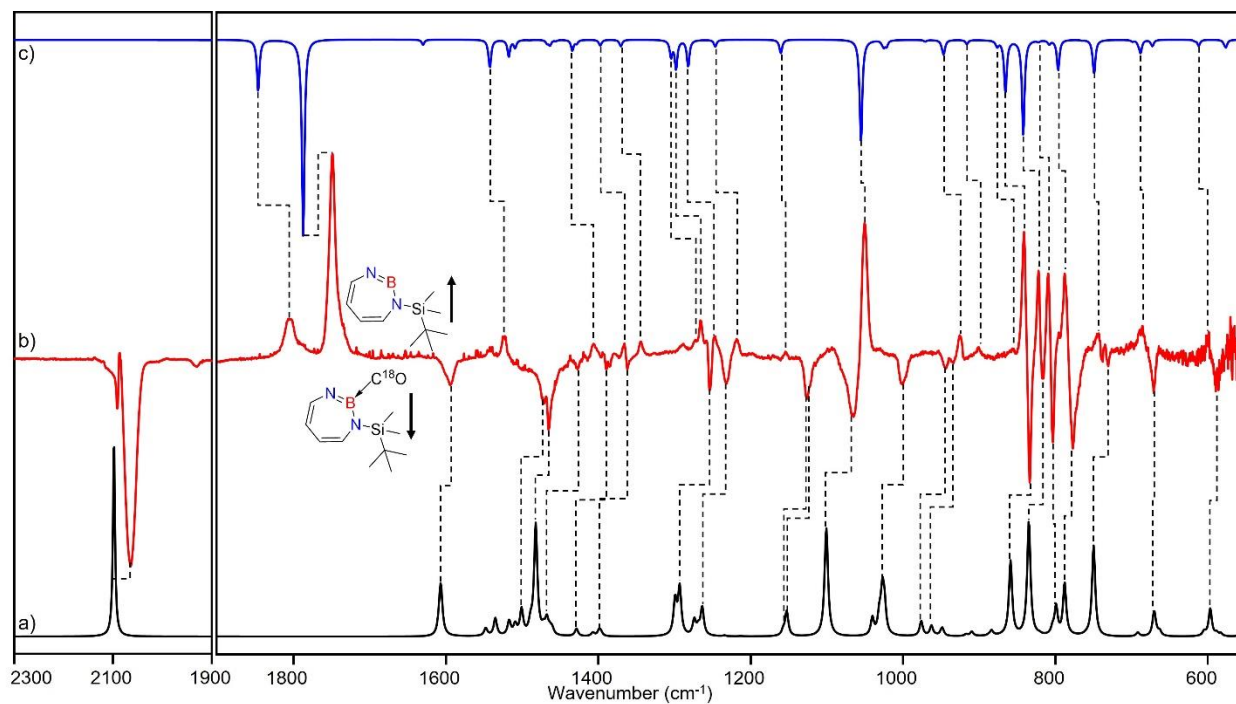

**Figure S12.** a) Spectrum for <sup>11</sup>B and <sup>10</sup>B (81:19) and C<sup>18</sup>O isotopologues of **4** calculated at the B3LYP-D3(BJ)/6–311+G(d,p) level of theory. b) Difference IR spectrum after irradiation with 435 nm > λ > 620 nm for 30 min (following the annealing step). c) Spectrum for <sup>11</sup>B and <sup>10</sup>B isotopologues (81:19) of **2** calculated at the B3LYP-D3(BJ)/6–311+G(d,p) level of theory.

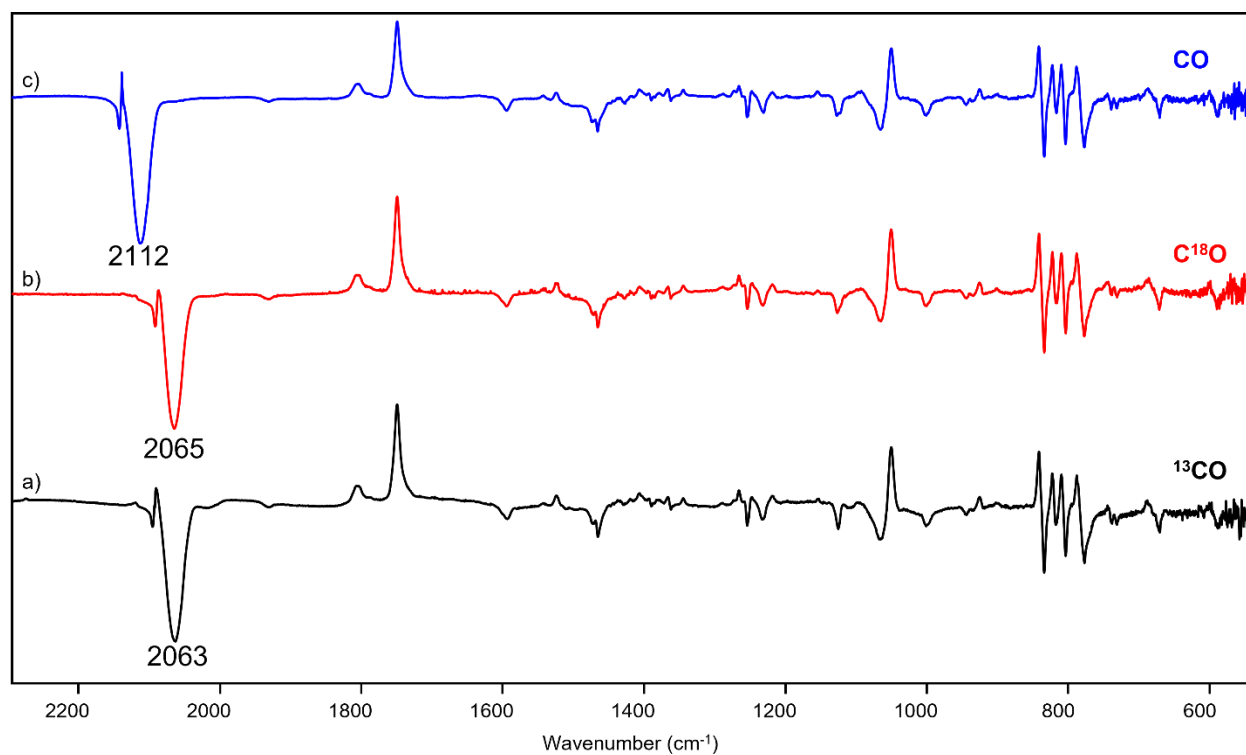

**Figure S13.** Difference IR spectrum after irradiation with  $435\text{ nm} > \lambda > 620\text{ nm}$  for 30 min (following the annealing step) with a)  $^{13}\text{C}^{16}\text{O}$  isotope, b)  $^{12}\text{C}^{18}\text{O}$  isotope and c)  $^{12}\text{C}^{16}\text{O}$  isotopes of **4** in Ar matrix.

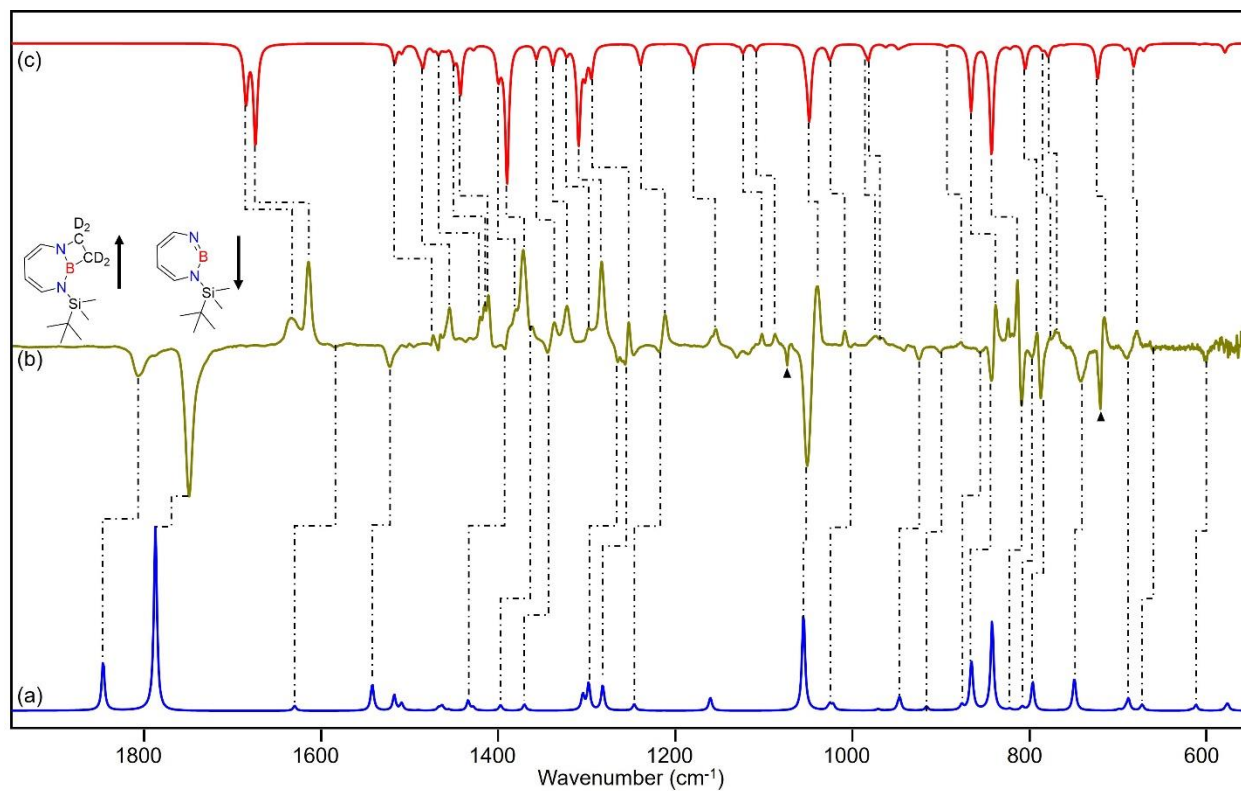

**Figure S14.** a) Spectrum for  $^{11}\text{B}$  and  $^{10}\text{B}$  isotopologues (81:19) of **2** calculated at the B3LYP-D3(BJ)/6–311+G(d,p) level of theory. b) Difference IR spectrum after annealing to 30 K for 60 min (following the irradiation step). c) Spectrum for  $^{11}\text{B}$  and  $^{10}\text{B}$  (81:19) and  $\text{C}_2\text{D}_4$  isotopologues of **5** calculated at the B3LYP-D3(BJ)/6–311+G(d,p) level of theory. ( $\blacktriangle$  corresponds to the peaks of  $\text{C}_2\text{D}_4$ )

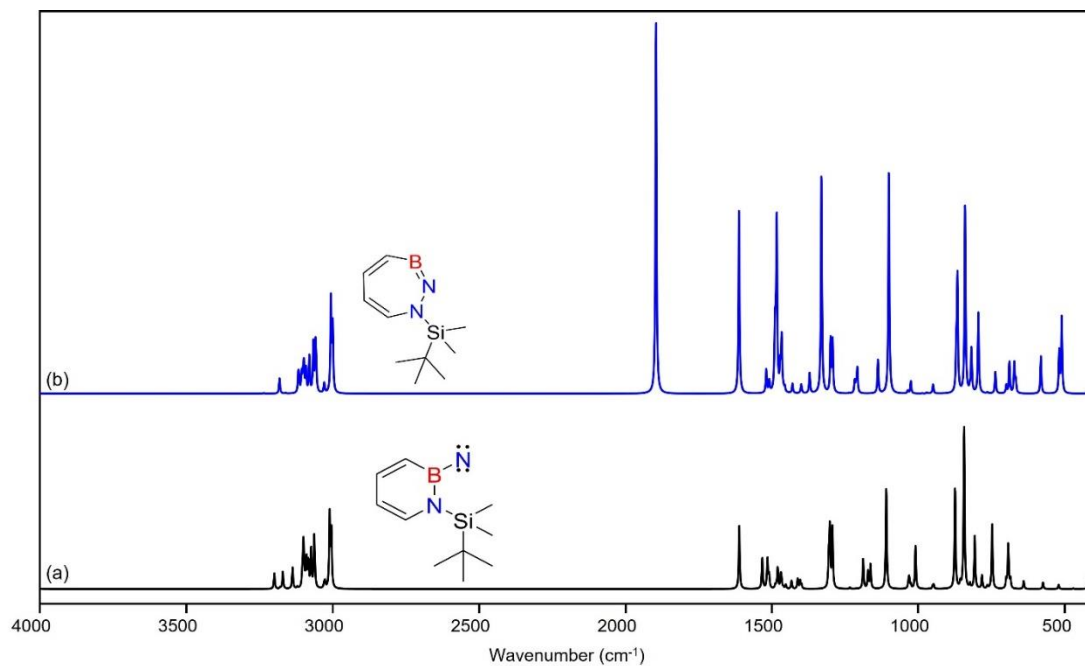

**Figure S15.** Spectrum for a) triplet boryl nitrene and b) 1H-1,2,3-diazaborepine calculated at the B3LYP-D3(BJ)/6–311+G(d,p) level of theory.

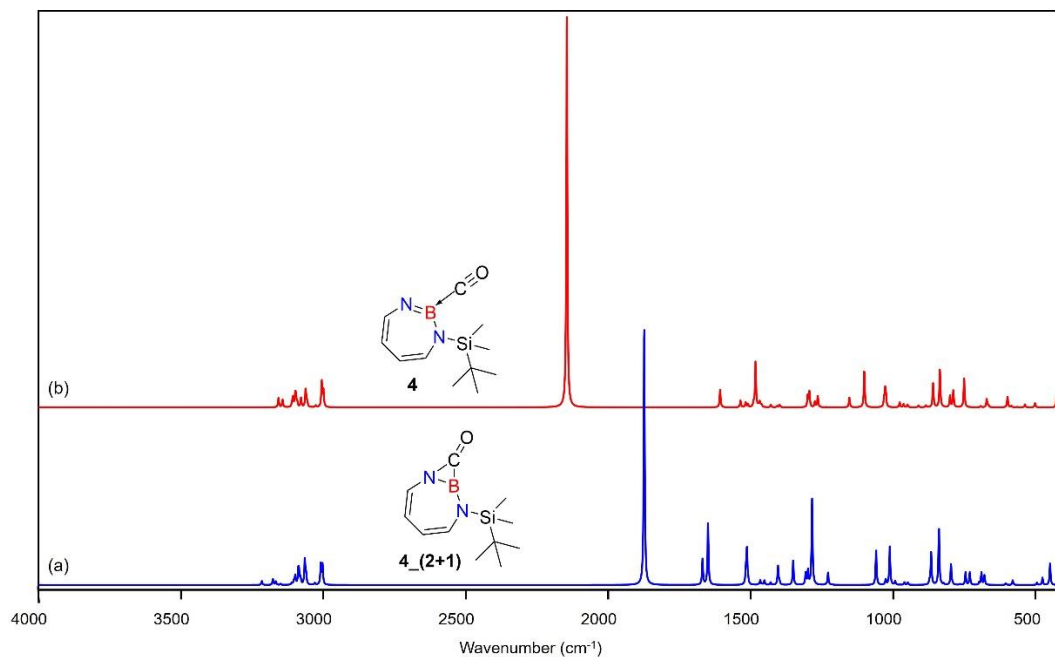

**Figure S16.** Spectrum for a) 4<sub>(2 + 1)</sub> and b) 4 calculated at the B3LYP-D3(BJ)/6–311+G(d,p) level of theory.



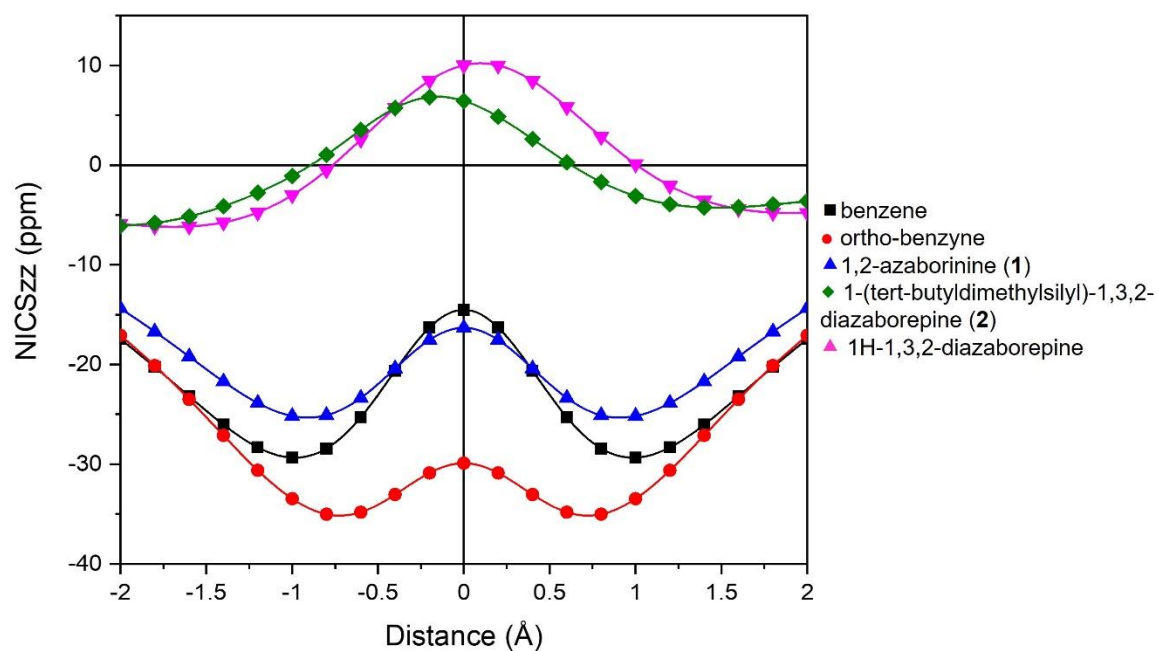

**Figure S17.** Plot of NICS<sub>zz</sub> value calculated along a line perpendicular to the molecular plane, starting at the ring center, at B3LYP/6-311+G(d,p)//M06-2X/6-311+G(d,p) level of theory.

**Table S1.** The relative ZPVE corrected energies in kcal/mol for the reaction of **2** with CO as computed at the different level of theories.

|                                                                                            | 2 + CO       | 4_comp         | 4_comp'        | TS <sub>4comp'-4</sub> | 4               | TS <sub>4-4_(2+1)</sub> | 4_(2+1)        | TS <sub>4_comp-4_(2+2)</sub> | 4_(2+2)          |
|--------------------------------------------------------------------------------------------|--------------|----------------|----------------|------------------------|-----------------|-------------------------|----------------|------------------------------|------------------|
| <i>B3LYP-D3(BJ)/6-311+G(d,p)</i><br>[DLPNO-CCSD(T)/cc-pVTZ//<br>B3LYP-D3(BJ)/6-311+G(d,p)] | 0.0<br>[0.0] | -2.0<br>[-2.9] | -2.7<br>[-3.2] | -2.4<br>[-2.1]         | -12.8<br>[-7.0] | -4.6<br>[-1.4]          | -8.4<br>[-4.6] | 19.6<br>[20.0]               | -10.2<br>[-11.1] |
| <i>M06-2X/6-311+G(d,p)</i><br>[DLPNO-CCSD(T)/cc-pVTZ//<br>M06-2X/6-311+G(d,p)]             | 0.0<br>[0.0] | -2.0<br>[-2.9] | -2.5<br>[-3.4] | -1.2<br>[-2.1]         | -6.3<br>[-7.9]  | 0.1<br>[-1.5]           | -6.5<br>[-4.4] | 20.9<br>[20.2]               | -11.3<br>[-11.2] |

**Table S2.** The relative free energies ( $\Delta G$  at 298 K in kcal/mol) for the reaction of **2** with CO as computed at the different level of theories.

|                                                                                            | 2+ CO        | 4_comp         | 4_comp'        | TS <sub>4comp'-4</sub> | 4               | TS <sub>4-4_(2+1)</sub> | 4_(2+1)        | TS <sub>4_comp-4_(2+2)</sub> | 4_(2+2)          |
|--------------------------------------------------------------------------------------------|--------------|----------------|----------------|------------------------|-----------------|-------------------------|----------------|------------------------------|------------------|
| <i>B3LYP-D3(BJ)/6-311+G(d,p)</i><br>[DLPNO-CCSD(T)/cc-pVTZ//<br>B3LYP-D3(BJ)/6-311+G(d,p)] | 0.0<br>[0.0] | -2.0<br>[-2.9] | -2.7<br>[-3.2] | -2.4<br>[-2.1]         | -12.8<br>[-7.0] | -4.6<br>[-1.4]          | -8.4<br>[-4.6] | 19.6<br>[20.0]               | -10.2<br>[-11.1] |
| <i>M06-2X/6-311+G(d,p)</i><br>[DLPNO-CCSD(T)/cc-pVTZ//<br>M06-2X/6-311+G(d,p)]             | 0.0<br>[0.0] | -2.0<br>[-2.9] | -2.5<br>[-3.4] | -1.2<br>[-2.1]         | -6.3<br>[-7.9]  | 0.1<br>[-1.5]           | -6.5<br>[-4.4] | 20.9<br>[20.2]               | -11.3<br>[-11.2] |

**Table S3.** The relative ZPVE corrected energies in kcal/mol for the reaction of **2** with ethene (C<sub>2</sub>H<sub>4</sub>) as computed at the different level of theories.

|                                                                                            | 2+ C <sub>2</sub> H <sub>4</sub> | 5_comp'        | TS <sub>comp_5'-comp_5</sub> | 5_comp         | TS <sub>comp_5-5</sub> | 5                | TS <sub>comp_5'-6</sub> | 6                |
|--------------------------------------------------------------------------------------------|----------------------------------|----------------|------------------------------|----------------|------------------------|------------------|-------------------------|------------------|
| <i>B3LYP-D3(BJ)/6-311+G(d,p)</i><br>[DLPNO-CCSD(T)/cc-pVTZ//<br>B3LYP-D3(BJ)/6-311+G(d,p)] | 0.0<br>[0.0]                     | -3.8<br>[-4.3] | -3.3<br>[-3.3]               | -7.8<br>[-6.6] | -5.9<br>[-5.7]         | -41.6<br>[-46.9] | 15.8<br>[18.6]          | -49.6<br>[53.1]  |
| <i>M06-2X/6-311+G(d,p)</i><br>[DLPNO-CCSD(T)/cc-pVTZ//<br>M06-2X/6-311+G(d,p)]             | 0.0<br>[0.0]                     | -4.2<br>[-4.6] | -2.8<br>[-3.4]               | -6.9<br>[-6.7] | -5.5<br>[-5.7]         | -45.8<br>[-47.0] | 19.4<br>[18.4]          | -51.6<br>[-57.1] |

**Table S4.** The relative free energies (ΔG at 298 K in kcal/mol) for the reaction of **2** with ethene (C<sub>2</sub>H<sub>4</sub>) as computed at the different level of theories.

|                                                                                            | 2 + C <sub>2</sub> H <sub>4</sub> | 5_comp'      | TS <sub>comp_5'-comp_5</sub> | 5_comp       | TS <sub>comp_5-5</sub> | 5                | TS <sub>comp_5'-6</sub> | 6                |
|--------------------------------------------------------------------------------------------|-----------------------------------|--------------|------------------------------|--------------|------------------------|------------------|-------------------------|------------------|
| <i>B3LYP-D3(BJ)/6-311+G(d,p)</i><br>[DLPNO-CCSD(T)/cc-pVTZ//<br>B3LYP-D3(BJ)/6-311+G(d,p)] | 0.0<br>[0.0]                      | 4.0<br>[3.6] | 6.6<br>[6.7]                 | 3.5<br>[4.7] | 5.5<br>[5.7]           | -30.1<br>[-35.4] | 26.7<br>[29.5]          | -38.0<br>[-41.5] |
| <i>M06-2X/6-311+G(d,p)</i><br>[DLPNO-CCSD(T)/cc-pVTZ//<br>M06-2X/6-311+G(d,p)]             | 0.0<br>[0.0]                      | 7.2<br>[6.6] | 4.7<br>[4.9]                 | 4.7<br>[4.9] | 6.6<br>[6.4]           | -34.9<br>[-36.1] | 30.4<br>[29.5]          | -39.9<br>[-41.2] |

## Isodesmic Reactions as Tool to Calculate Equilibrium Constants for determining Lewis Acidity

We determined the Lewis acidity of **1** and **2** using the computational protocol used by Ofial et al. by determining the Lewis acidity from equilibrium constants of Lewis acid-base adduct formation.<sup>29</sup> We used the following equations (Figure S17) for the computation of Gibbs energies of association of boranes and Lewis bases at the SMD(DCM)/MN15/def2-TZVP level of theory following Ofial et al.<sup>29</sup>  $\Delta G^{\text{exptl}}$  values are taken from the paper by Ofial et al.<sup>29</sup>

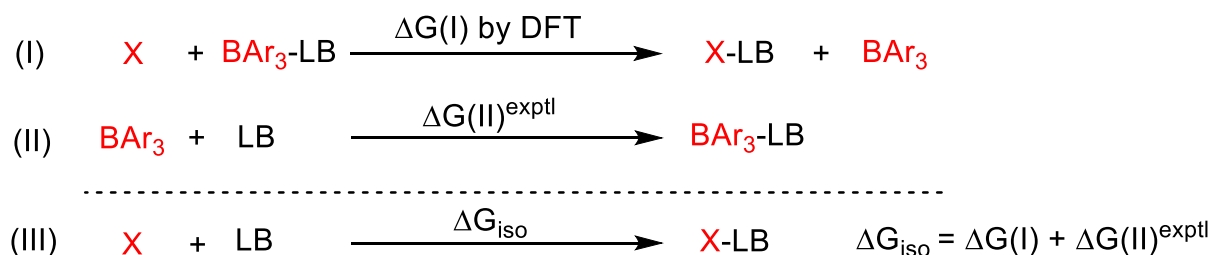

**Figure S17.** Combining the isodesmic reaction [Eq. (I)] with an experimental reference reaction [Eq.(II)] allows one to determine the Lewis acidities of X from  $\Delta G_{\text{iso}}$  [Eq.(III)].

To assess the Lewis acidity  $\text{LA}_\text{B}$  of 1,2-azaborinine **1** and 1,3,2-diazaborepine **2**, triaryl boranes ( $\text{BAr}_3$ ) ( $\text{Ar} = \text{C}_6\text{H}_5$  (**7a**), 4-Cl- $\text{C}_6\text{H}_4$  (**7b**), 3,4,5- $\text{F}_3\text{-C}_6\text{H}_2$  (**7c**)) were chosen as reference Lewis acids. We used three structurally diverse Lewis bases (pyridine (**8a**), acetonitrile (**8b**), and benzaldehyde (**8c**)) as reference to estimate the  $\text{LA}_\text{B}$  values. Based on the experimental  $\Delta G$  for the formation of Lewis adducts of **7a**•**8a**, **7b**•**8b**, and **7c**•**8c**, we estimate  $\text{LA}_\text{B}$  values of azaborinine **1** or 1,3,2-diazaborepine **2**. As outlined in Figure S17, the Gibbs reaction energies,  $\Delta G(\text{I})$ , for isodesmic Lewis base transfer reactions between the Lewis adduct  $\text{Ar}_3\text{B-LB}$  and X (**1** or **2**) were computed by using the

SMD(DCM)/MN15/def2-TZVP method. To determine  $LA_B$  of **1** and **2**, experimentally determined Gibbs energy,  $\Delta G^{exptl}$  (Figure S17), for the formation of a Lewis adduct of  $Ar_3B$  and the investigated Lewis base was added to  $\Delta G(I)$  to give  $\Delta G_{iso}$  (Figure S17). The Gibbs energy,  $\Delta G_{iso}$ , in Equation III (Figure S17) now describes the thermodynamics of Lewis adduct formation between X (X = **1** or **2**) and a Lewis base, which can be used to estimate the Lewis acidity,  $LA_B$ , of **1** or **2** if  $LB_B$  of the Lewis base is known according to the following equation:

$$\log K_B = LA_B + LB_B$$

**Table S5.** Energies of the reaction of equation (I), (II), and (III) with pyridine (**8a**) and  $BAr_3$  (**7a**) as reference Lewis base and acid, respectively, at the SMD(DCM)/MN15/def2-TZVP level of theory and calculation of  $LA_B$  via an isodesmic reaction.

| Species (X)                                                                                                                                                                                 | $\Delta G(I)$<br>(kJ/mol) | $\Delta G(II)_{exptl}^a$<br>(kJ/mol) | $\Delta G_{iso}$<br>(kJ/mol) | $K_B (M^{-1})^b$     | $LA_B^b$ |
|---------------------------------------------------------------------------------------------------------------------------------------------------------------------------------------------|---------------------------|--------------------------------------|------------------------------|----------------------|----------|
| <b>1</b>                                                                                                                                                                                    | -139.8                    | -34.5                                | -174.3                       | $1.2 \times 10^{31}$ | 25.0     |
| <b>2</b>                                                                                                                                                                                    | -71.6                     | -34.5                                | -106.1                       | $8.3 \times 10^{18}$ | 12.8     |
| <sup>a</sup> Experimental $K_B$ for the reaction of <b>7a</b> with <b>8a</b> (see SI of ref. <sup>29</sup> ) converted to $\Delta G$ with $\Delta G = -RT \ln K_B$ . <sup>b</sup> At 20 °C. |                           |                                      |                              |                      |          |

**Table S6.** Energies of the reaction of equation (I), (II), and (III) with acetonitrile (**8b**) and BAr<sub>3</sub> (**7b**) as reference Lewis base and acid, respectively, at the SMD(DCM)/MN15/def2-TZVP level of theory and calculation of LA<sub>B</sub> via an isodesmic reaction.

| Species (X)                                                                                                                                                                                 | $\Delta G(I)$<br>(kJ/mol) | $\Delta G(II)_{\text{exptl}}^a$<br>(kJ/mol) | $\Delta G_{\text{iso}}$<br>(kJ/mol) | $K_B (M^{-1})^b$ | LA <sub>B</sub> <sup>b</sup> |
|---------------------------------------------------------------------------------------------------------------------------------------------------------------------------------------------|---------------------------|---------------------------------------------|-------------------------------------|------------------|------------------------------|
| <b>1</b>                                                                                                                                                                                    | -109.9                    | -3.9                                        | -113.8                              | $1.9 * 10^{20}$  | 20.8                         |
| <b>2</b>                                                                                                                                                                                    | -36.2                     | -3.9                                        | -40.1                               | $1.4 * 10^7$     | 7.6                          |
| <sup>a</sup> Experimental $K_B$ for the reaction of <b>7b</b> with <b>8b</b> (see SI of ref. <sup>29</sup> ) converted to $\Delta G$ with $\Delta G = -RT \ln K_B$ . <sup>b</sup> At 20 °C. |                           |                                             |                                     |                  |                              |

**Table S7.** Energies of the reaction of equation (I), (II) and (III) with benzaldehyde (**8c**) and BAr<sub>3</sub> (**7c**) as reference Lewis base and acid, respectively, at the SMD(DCM)/MN15/def2-TZVP level of theory and calculation of LA<sub>B</sub> via an isodesmic reaction.

| Species (X)                                                                                                                                                                                 | $\Delta G(I)$<br>(kJ/mol) | $\Delta G(II)_{\text{exptl}}^a$<br>(kJ/mol) | $\Delta G_{\text{iso}}$<br>(kJ/mol) | $K_B (M^{-1})^b$ | LA <sub>B</sub> <sup>b</sup> |
|---------------------------------------------------------------------------------------------------------------------------------------------------------------------------------------------|---------------------------|---------------------------------------------|-------------------------------------|------------------|------------------------------|
| <b>1</b>                                                                                                                                                                                    | -81.7                     | -13.2                                       | -94.9                               | $8.4 * 10^{16}$  | 18.7                         |
| <b>2</b>                                                                                                                                                                                    | -15.8                     | -13.2                                       | -29.0                               | $1.5 * 10^5$     | 6.9                          |
| <sup>a</sup> Experimental $K_B$ for the reaction of <b>7c</b> with <b>8c</b> (see SI of ref. <sup>29</sup> ) converted to $\Delta G$ with $\Delta G = -RT \ln K_B$ . <sup>b</sup> At 20 °C. |                           |                                             |                                     |                  |                              |

**Table S8.** LA<sub>B</sub> from the three reference reactions and averaged LA<sub>B</sub>.

| Lewis Acid | LA <sub>B</sub> from <b>8a</b> | LA <sub>B</sub> from <b>8b</b> | LA <sub>B</sub> from <b>8c</b> | LA <sub>B</sub> Average |
|------------|--------------------------------|--------------------------------|--------------------------------|-------------------------|
| <b>1</b>   | 25.0                           | 20.8                           | 18.7                           | $21.5 \pm 2.6$          |
| <b>2</b>   | 12.8                           | 7.6                            | 6.9                            | $9.1 \pm 2.6$           |

### CASSCF Calculation to Understand the Ring Enlargement Process.

Complete active space self-consistent field (CASSCF) theory in combination with def2-SV(P)<sup>28</sup> basis set was used to compute the energies of nitrene electronic states. We considered a model system without the TBS group to interpret compound **2**. The active space consisted of 8 orbitals and 8 electrons (Figure S18). We also computed single point energies with fully internally contracted N-electron valence state perturbation theory (FIC-NEVPT2)<sup>30</sup> to include the effects of dynamic correlation. This results in singlet A'' state as the lowest singlet state which is energetically very close to the A' singlet state (Table S9).

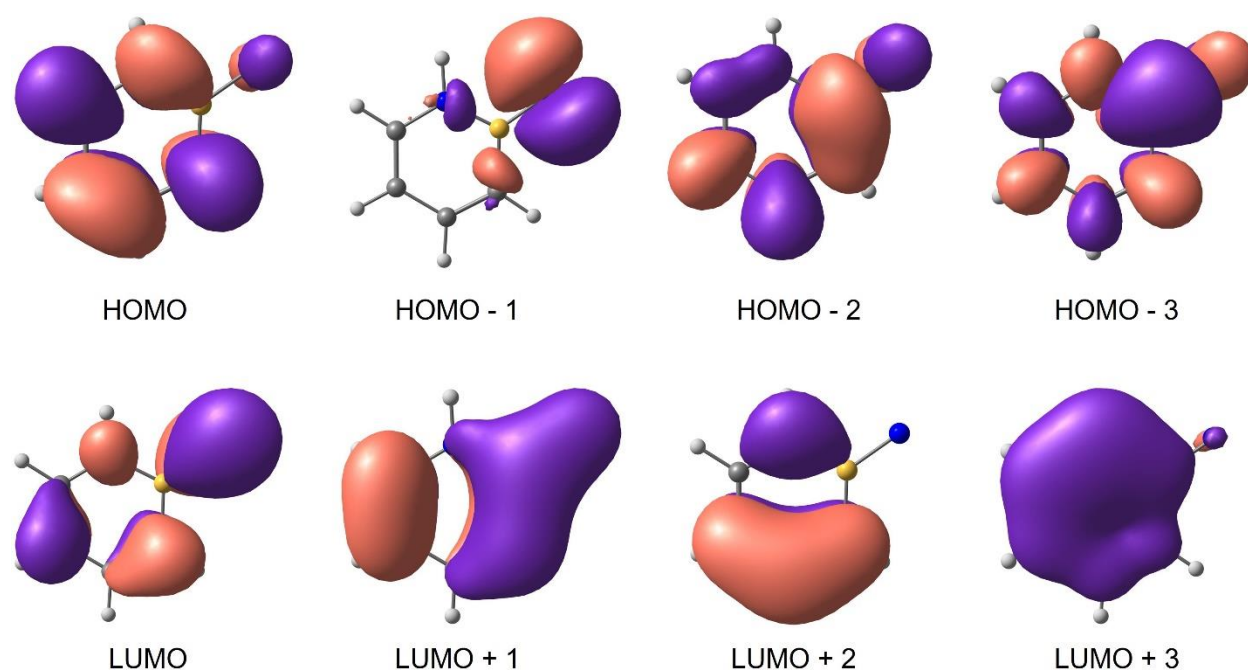

**Figure S18.** Active space orbitals used for the calculation of transition energies at CASSCF(8,8)/def2-SV(P) level of theory.

**Table S9.** Transition energies obtained with FIC-NEVPT2/def2-SV(P)//CASSCF(8,8)/def2-SV(P) (bold) and CASSCF(8,8)/def2-SV(P) (italics) level of theory.

| State | Root | Multiplicity | IRREP | $\Delta E$ (kcal/mol)         |
|-------|------|--------------|-------|-------------------------------|
| 0     | 0    | 3            | A''   | <b>0.0</b> / <i>0.0</i>       |
| 1     | 0    | 1            | A''   | <b>33.60</b> / <i>37.38</i>   |
| 2     | 0    | 1            | A'    | <b>34.89</b> / <i>37.54</i>   |
| 3     | 0    | 3            | A'    | <b>120.35</b> / <i>119.52</i> |

We also scanned the potential energy surface by fixing the C-B-N angle in the  $^1A'$  state to determine the barrier for the ring enlargement reaction (Figure 20). For this we considered an active space consisting of 10 orbitals and 10 electrons (Figure 19).

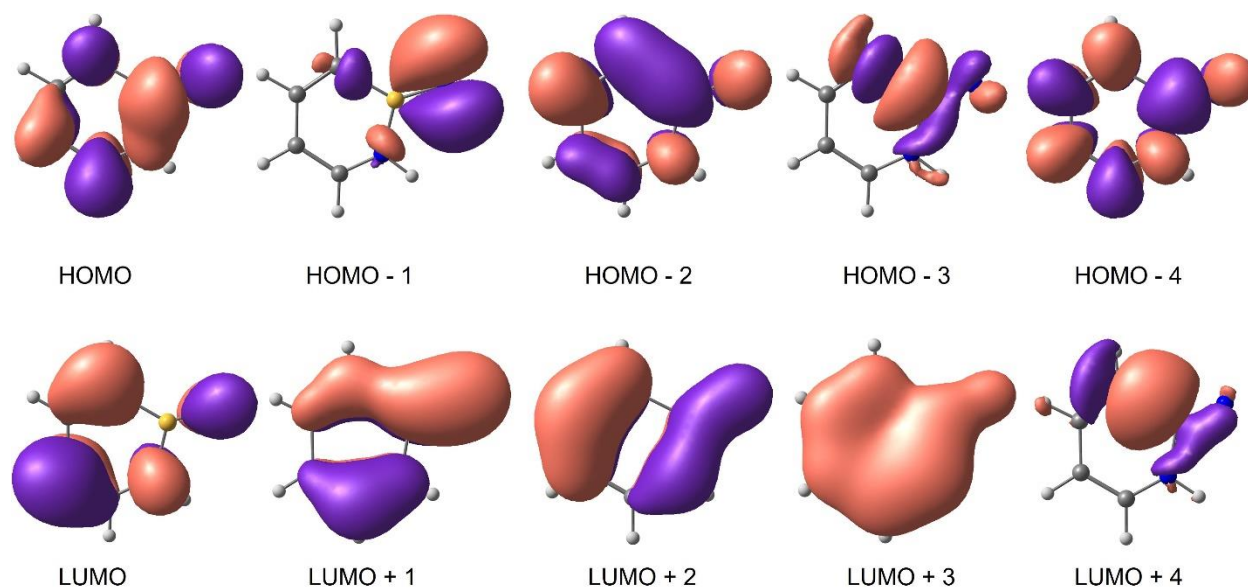

**Figure S19.** Active space orbitals used for the scan calculation of angle CBN at CASSCF(10,10)/def2-SV(P) level of theory.



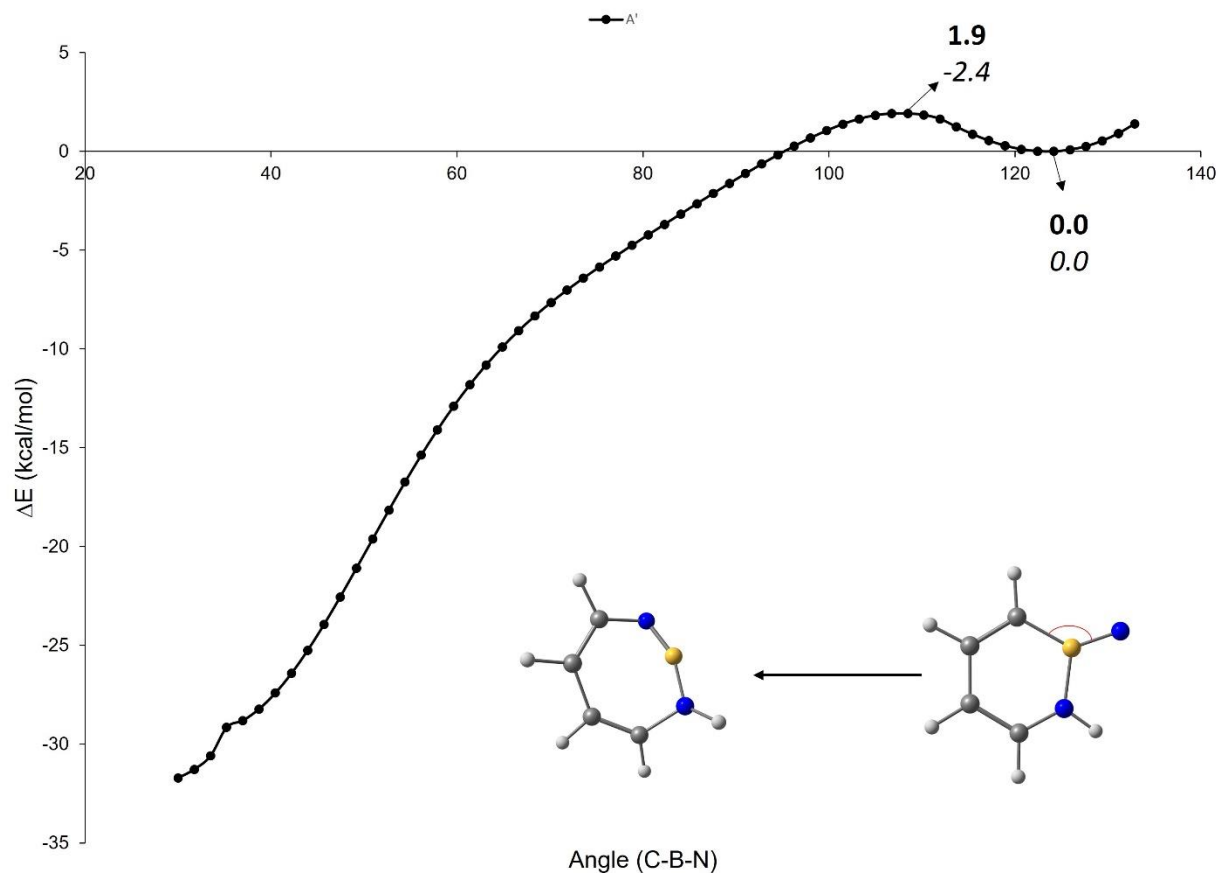

**Figure S20.** Scan calculation of angle CBN at CASSCF(10,10)/def2-SV(P) (**bold**) and single point at maximum and minimum at FIC-NEVPT2/def2-SV(P)//CASSCF(10,10)/def2-SV(P) (*italics*) level of theory.

The barrier is very small (1.9 kcal/mol) at the CASSCF level of theory, and it disappears entirely at NEVPT2//CASSCF. This implies that the singlet nitrene is not an observable species and  $N_2$  extrusion and ring enlargement are concerted.

**Table S10.** Intrinsic reaction coordinate (IRC) path for the reactions of **2** with CO and C<sub>2</sub>H<sub>4</sub> respectively at M06-2X/6-311+G(d,p) level of theory.

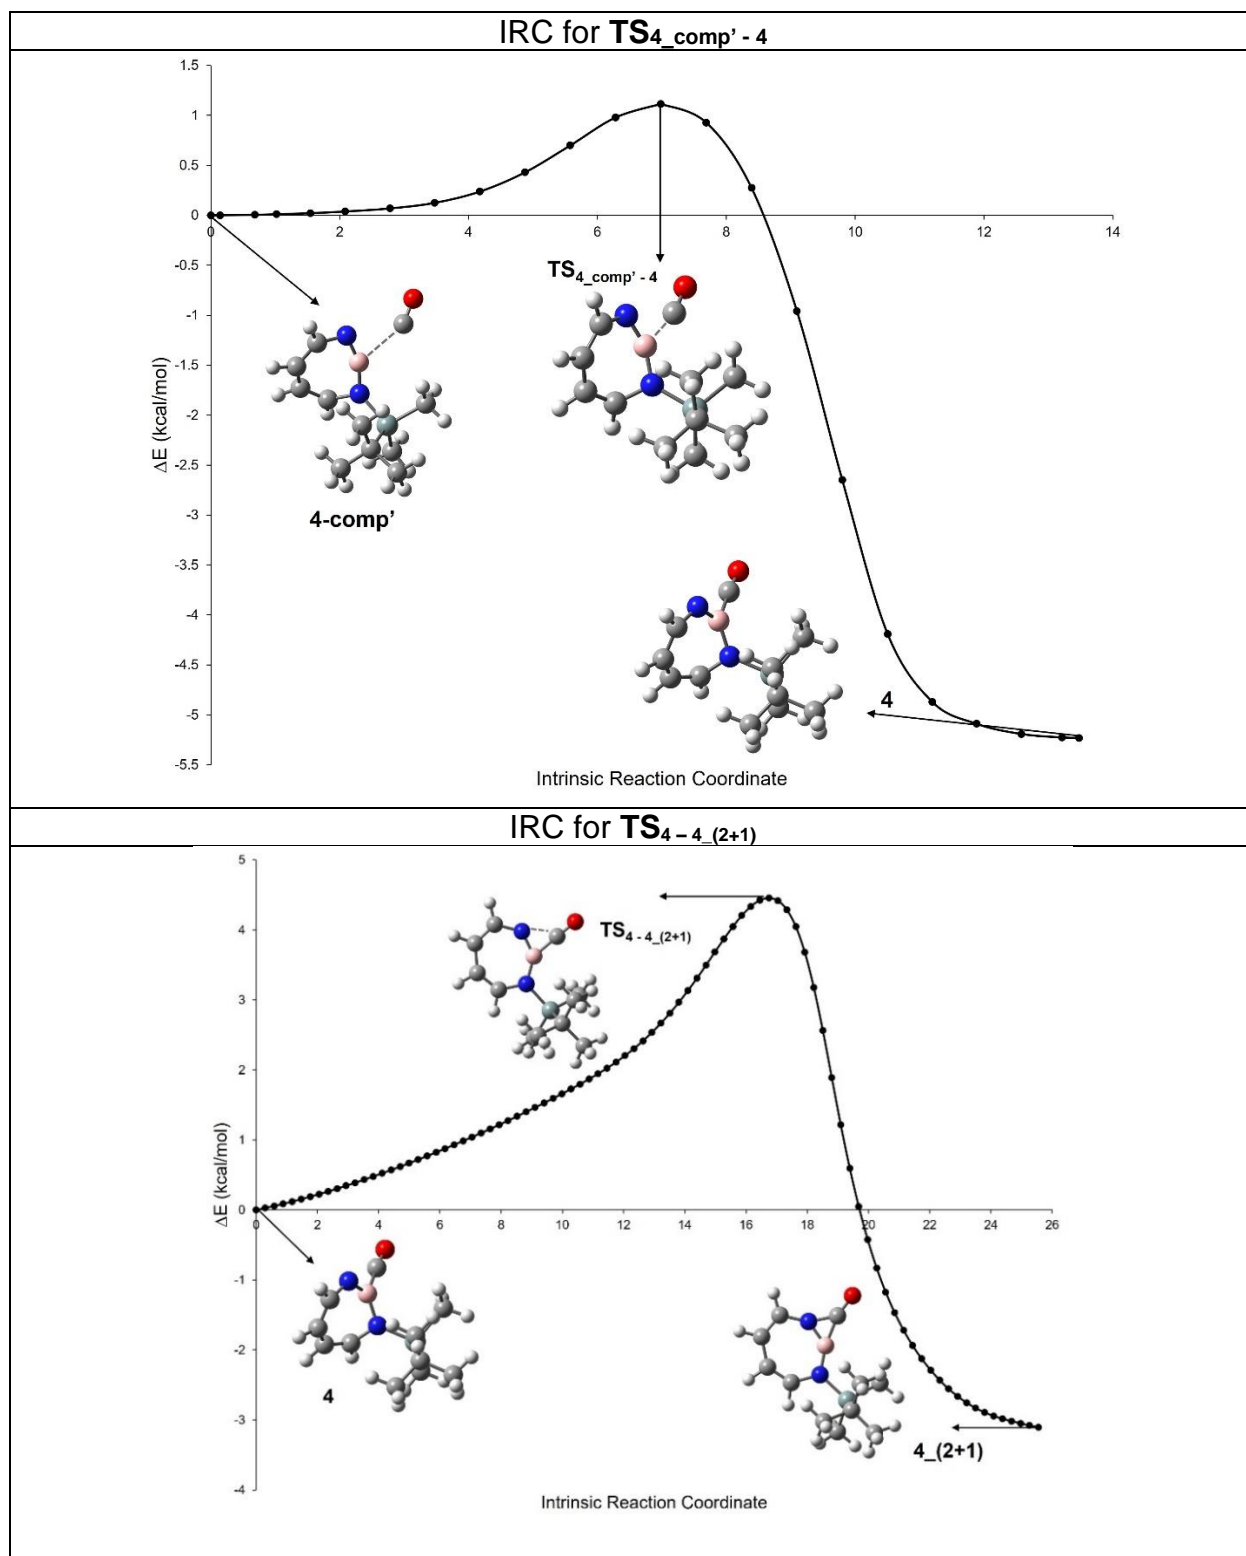

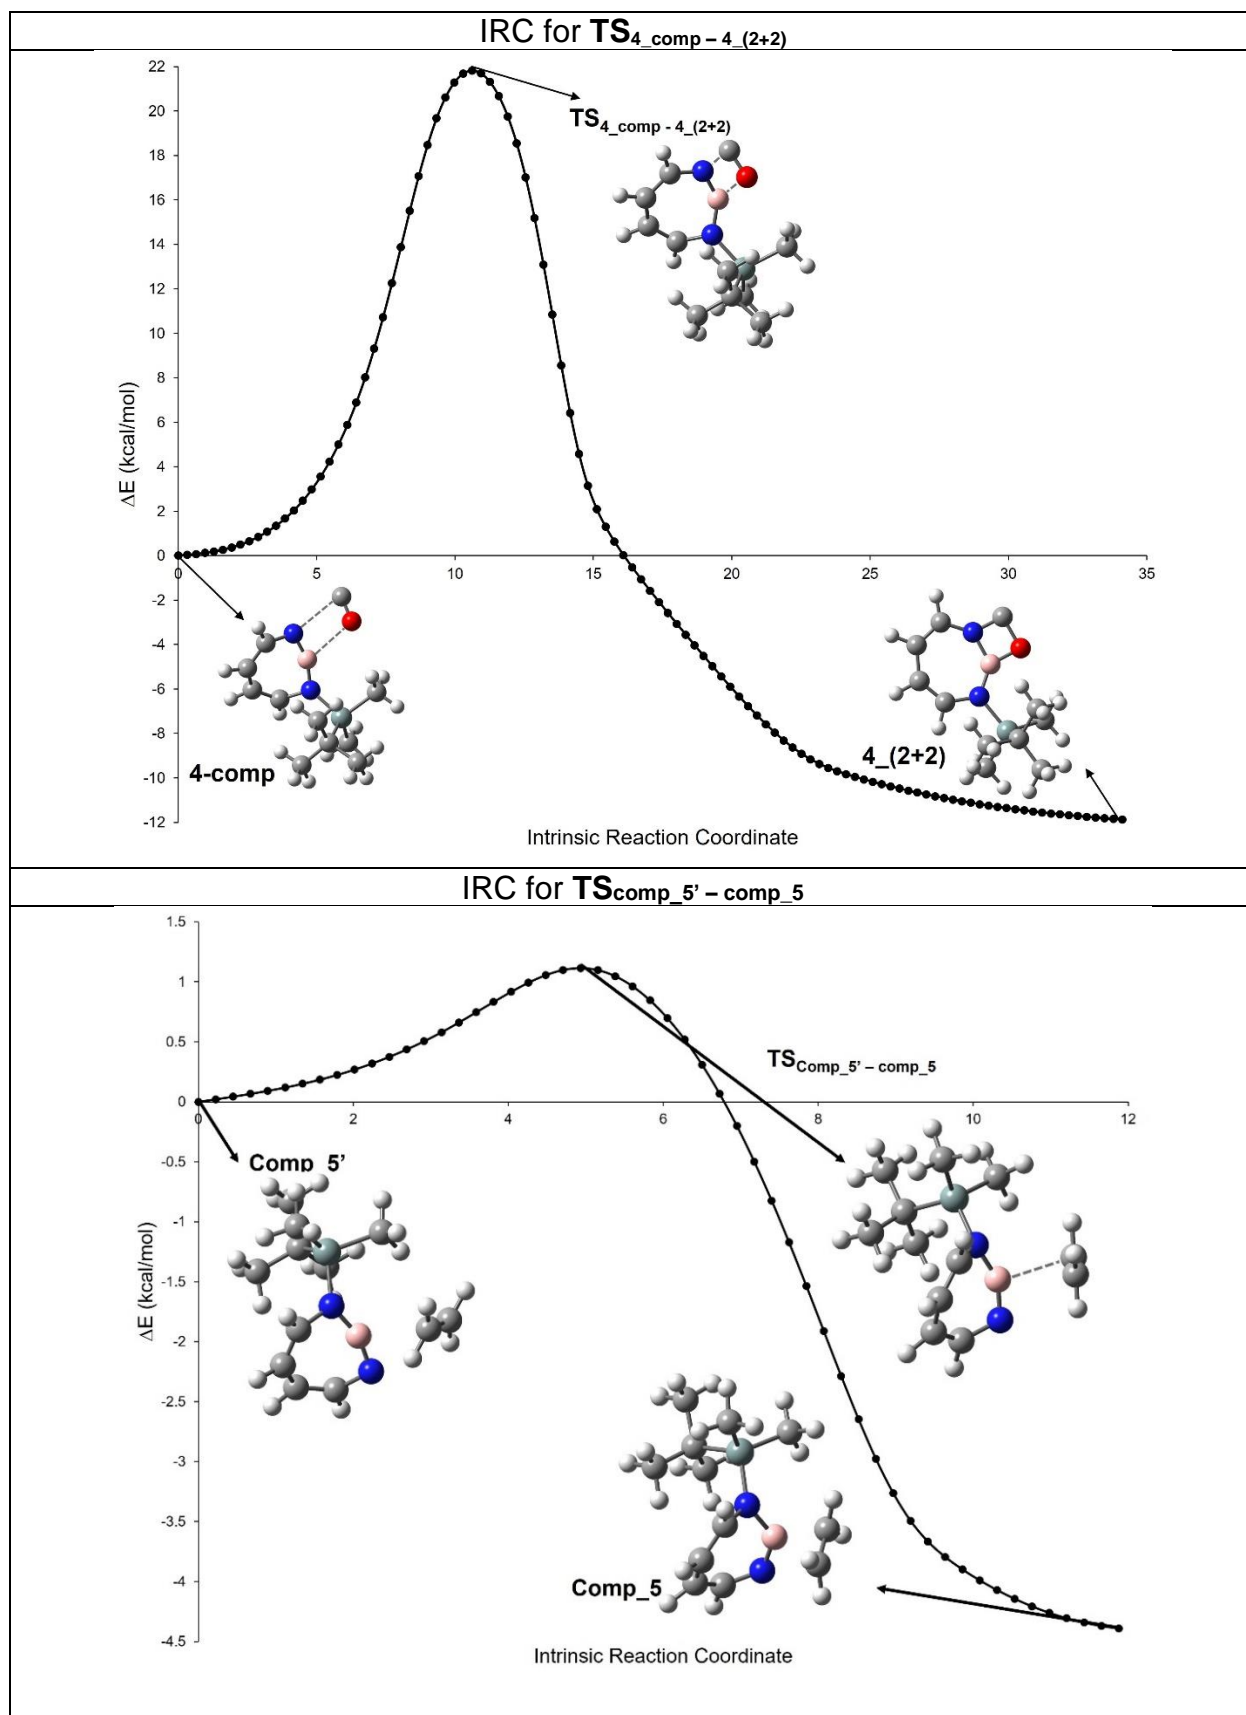

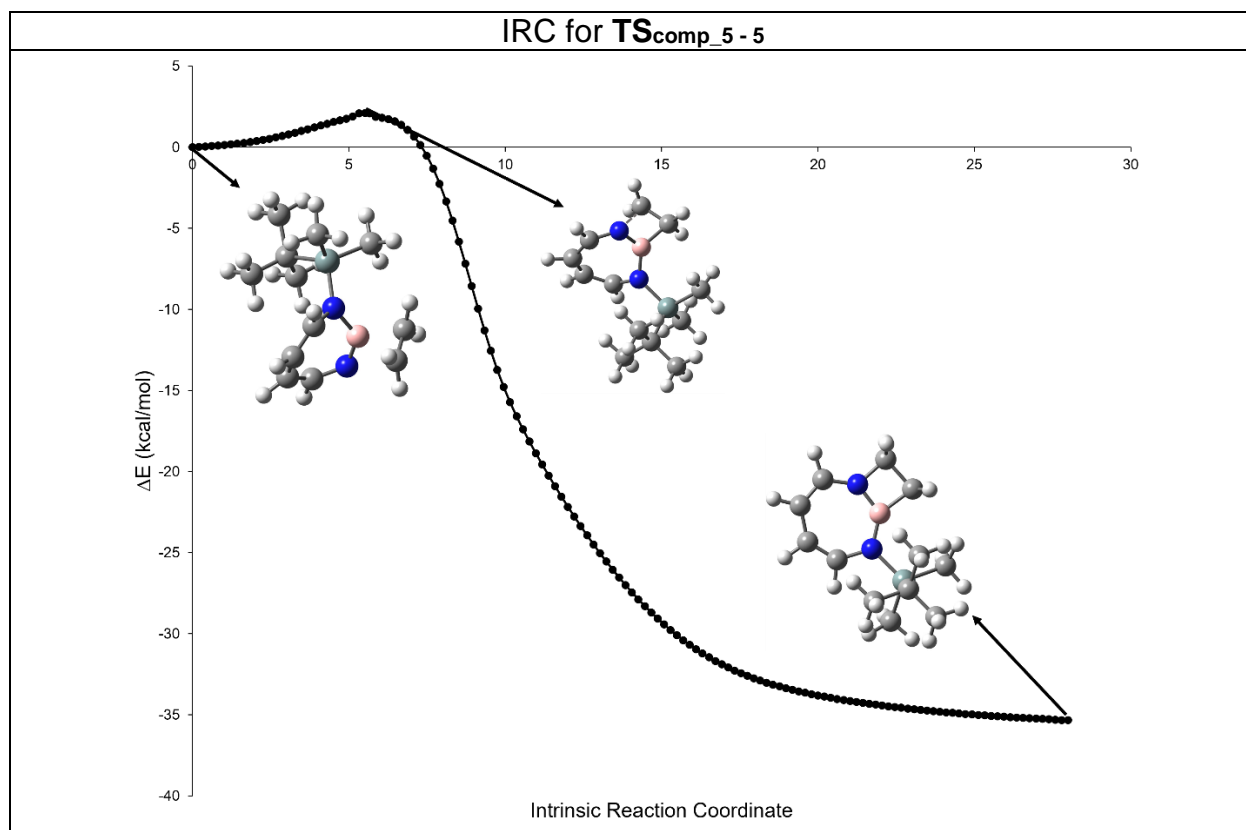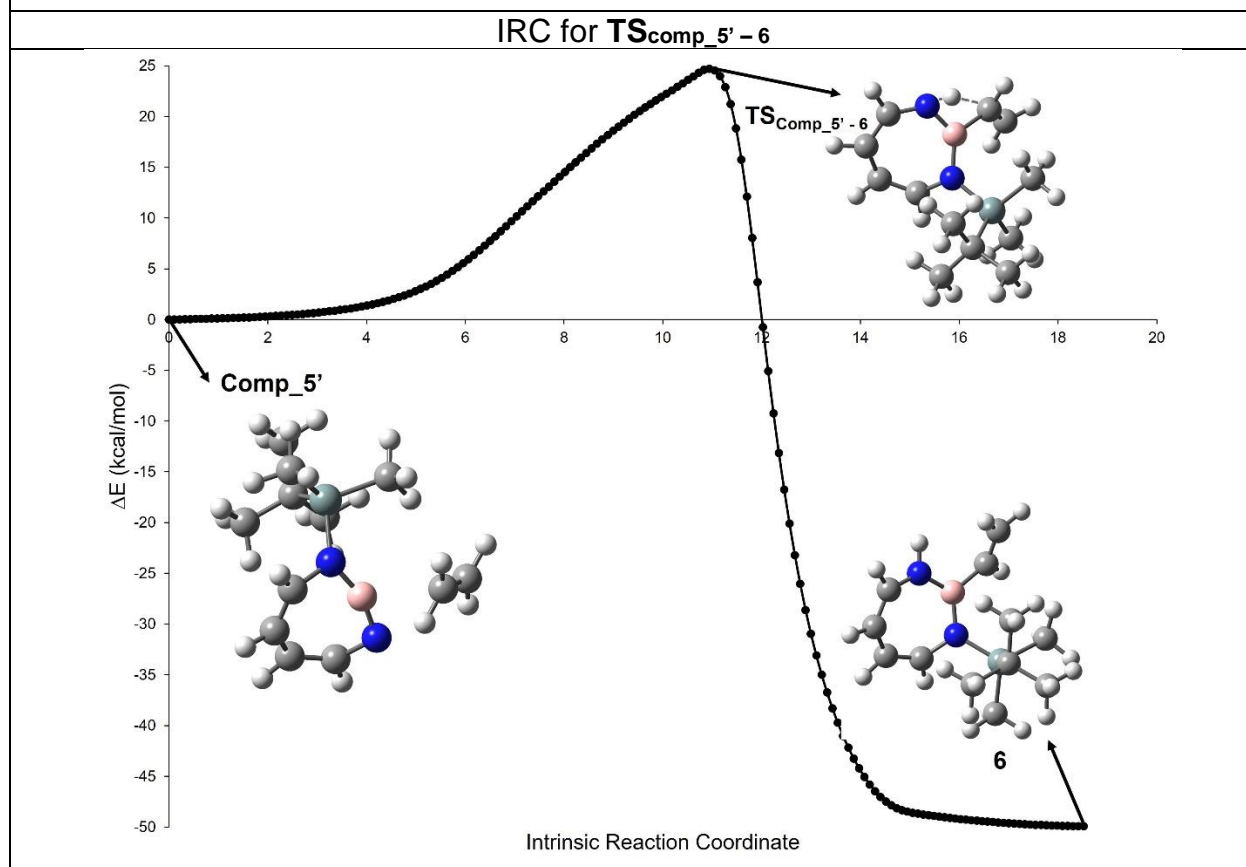

**Table S11.** NBO analysis of the C=C→B interaction for complex **5\_comp** formed at the M06-2X/6-311+G(d,p) level of theory.

|               | $\Delta E^{(a)}$ | %(C=C) <sup>(b)</sup> | %B <sup>(b)</sup> | Occ. (C=C) <sup>(c)</sup> | Occ.B <sup>(c)</sup> |
|---------------|------------------|-----------------------|-------------------|---------------------------|----------------------|
| <b>5_comp</b> | 314.8            | 78.4                  | 20.6              | 1.589                     | 0.497                |

(a) NBO second order perturbation interaction energy associated with the R→B interaction, in kcal mol<sup>-1</sup>. (b) Percentage of the donor and acceptor NBO in the corresponding NLMO. (c) Occupancy of the donor and acceptor NBO orbitals.

**Table S12.** NBO plots for the (a) donor NBO, (b) acceptor NBO and (c) corresponding NLMO associated with the C=C→B interaction for complex **5\_comp** at the M06-2X/6-311+G(d,p) level of theory.

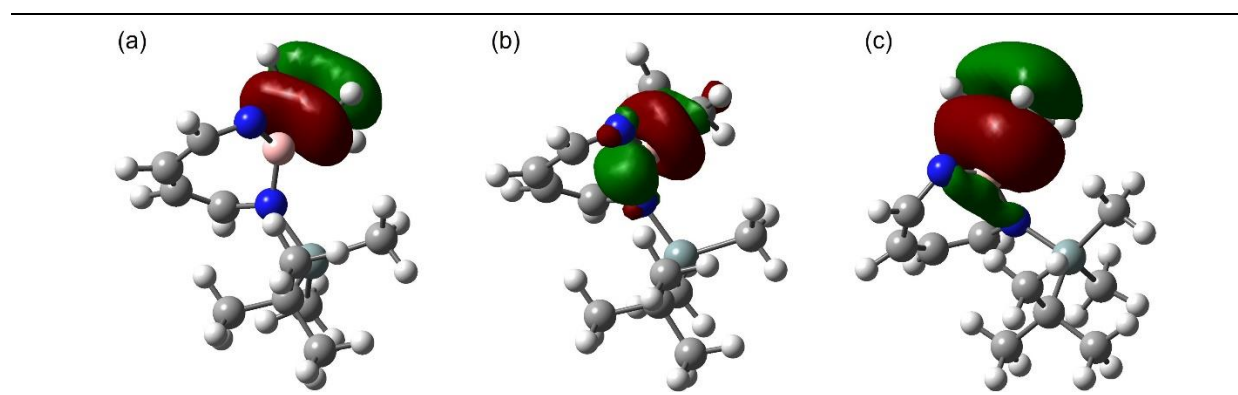

**Table S13.** Infrared spectroscopic data of experimental and computed (B3LYP-D3(BJ)/6-311+G(d,p)) vibrational frequencies of **3** in argon matrix.

| Vibrational Mode <sup>a</sup> | Experimental              |                | Computational             |                    | Assignments                             |
|-------------------------------|---------------------------|----------------|---------------------------|--------------------|-----------------------------------------|
|                               | $\nu$ (cm <sup>-1</sup> ) | I <sup>b</sup> | $\nu$ (cm <sup>-1</sup> ) | I <sup>b</sup>     |                                         |
| 99                            | 3079                      | 0.012          | 3246                      | 0.007              | CH str. (ring)                          |
| 98                            | 3043                      | 0.008          | 3193                      | 0.006              | CH str. (ring)                          |
| 97                            | 3007                      | 0.006          | 3155                      | 0.017              | CH str. (ring)                          |
| 96                            |                           |                | 3135                      | 0.016              | CH str. (ring)                          |
| 91                            | 2961                      | 0.070          | 3102                      | 0.072              | CH str. (tert-butyl grp)                |
| 89                            |                           |                | 3096                      | 0.021              | CH asym. str. (tert-butyl grp)          |
| 88                            | 2939                      | 0.028          | 3076                      | 0.053              | CH sym. str. (tert-butyl grp)           |
| 87                            | 2935                      | 0.050          | 3071                      | 0.015              | CH sym. str. (tert-butyl grp)           |
| 85                            | 2903                      | 0.016          | 3036                      | 0.011              | CH str. (methyl grp)                    |
| 83                            | 2888                      | 0.012          | 3016                      | 0.07               | CH sym. str. (tert-butyl grp)           |
| 82                            | 2864                      | 0.054          | 3010                      | 0.023              | CH sym. str. (tert-butyl grp)           |
| 80                            | 2141                      | 1.000          | 2266                      | 1.000 <sup>c</sup> | N3 str.                                 |
| 79                            | 1612                      | 0.262          | 1647                      | 0.117              | ring str.                               |
| 78                            | 1513                      | 0.431          | 1545                      | 0.129              | ring str.                               |
| 77                            | 1474                      | 0.093          | 1520                      | 0.009              | CH scissor (tert-butyl grp)             |
| 75                            | 1466                      | 0.063          | 1511                      | 0.016              | CH scissor (tert-butyl grp)             |
| 71                            | 1457                      | 0.070          | 1483                      | 0.083              | ring breathing                          |
| 66 [ <sup>10</sup> B]         | 1409                      | 0.062          | 1447 [ <sup>10</sup> B]   | 0.055              | CH bend (ring), BN str.                 |
| 66                            | 1402                      | 0.102          | 1438                      | 0.091              | CH bend (ring), BN str.                 |
| 65                            | 1399                      | 0.209          | 1433                      | 0.166              | CH wag (tert-butyl grp), CH bend (ring) |
| 64                            | 1363                      | 0.020          | 1408                      | 0.006              | CH wag (tert-butyl grp)                 |
| 62                            | 1327                      | 0.054          | 1396                      | 0.176              | CH bend (ring), N3 str.                 |
| 61 [ <sup>10</sup> B]         | 1291                      | 0.016          | 1310 [ <sup>10</sup> B]   | 0.021              | CH bend (ring)                          |
| 61                            | 1283                      | 0.206          | 1308                      | 0.097              | CH bend (ring)                          |
| 60                            | 1262                      | 0.053          | 1299                      | 0.013              | CH wag (methyl grp)                     |
| 59                            | 1255                      | 0.022          | 1293                      | 0.046              | CH wag (methyl grp)                     |
| 58 [ <sup>10</sup> B]         | 1251                      | 0.054          | 1260 [ <sup>10</sup> B]   | 0.016              | CH wag (tert-butyl grp), BN str.        |
| 58                            | 1232                      | 0.086          | 1234                      | 0.006              | CH wag (tert-butyl grp), BN str.        |
| 57                            | 1225                      | 0.039          | 1226                      | 0.039              | CH wag (tert-butyl grp), ring str.      |

|                                                                                                                                                                                                                        |      |       |                         |       |                                             |
|------------------------------------------------------------------------------------------------------------------------------------------------------------------------------------------------------------------------|------|-------|-------------------------|-------|---------------------------------------------|
| 54 [ <sup>10</sup> B]                                                                                                                                                                                                  | 1174 | 0.016 | 1193 [ <sup>10</sup> B] | 0.007 | CH bend (ring)                              |
| 54                                                                                                                                                                                                                     | 1162 | 0.034 | 1186                    | 0.006 | CH bend (ring)                              |
| 53 [ <sup>10</sup> B]                                                                                                                                                                                                  | 1151 | 0.043 | 1181 [ <sup>10</sup> B] | 0.014 | ring str., BN str                           |
| 53                                                                                                                                                                                                                     | 1142 | 0.257 | 1171                    | 0.088 | ring str., BN str                           |
| 52 [ <sup>10</sup> B]                                                                                                                                                                                                  | 1086 | 0.016 | 1118 [ <sup>10</sup> B] | 0.013 | ring deformation, BN str                    |
| 52                                                                                                                                                                                                                     | 1072 | 0.074 | 1103                    | 0.081 | ring deformation, BN str                    |
| 50                                                                                                                                                                                                                     | 1016 | 0.068 | 1032                    | 0.013 | CH bend (ring)                              |
| 49                                                                                                                                                                                                                     | 1004 | 0.007 | 1025                    | 0.003 | CH wag (tert-butyl grp)                     |
| 47                                                                                                                                                                                                                     | 988  | 0.161 | 1011                    | 0.065 | ring str.                                   |
| 44                                                                                                                                                                                                                     | 938  | 0.012 | 949                     | 0.002 | CH twist (tert-butyl grp)                   |
| 43                                                                                                                                                                                                                     | 935  | 0.004 | 939                     | 0.006 | CH wag (tert-butyl grp)                     |
| 42                                                                                                                                                                                                                     | 823  | 0.168 | 870                     | 0.065 | CH rock (methyl grp)                        |
| 41                                                                                                                                                                                                                     | 811  | 0.318 | 849                     | 0.231 | CH wag (methyl grp)                         |
| 38                                                                                                                                                                                                                     | 791  | 0.145 | 804                     | 0.061 | CH twist (methyl grp)                       |
| 36                                                                                                                                                                                                                     | 764  | 0.034 | 771                     | 0.02  | ring str., N3 bend                          |
| 35                                                                                                                                                                                                                     | 739  | 0.135 | 752                     | 0.061 | CH wag (ring)                               |
| 34                                                                                                                                                                                                                     | 701  | 0.060 | 706                     | 0.001 | CH wag (methyl grp)                         |
| 32                                                                                                                                                                                                                     | 684  | 0.054 | 695                     | 0.019 | ring breathing, N3 bend                     |
| 31                                                                                                                                                                                                                     | 669  | 0.017 | 669                     | 0.003 | ring breathing, N3 bend, CH wag(methyl grp) |
| 30                                                                                                                                                                                                                     | 614  | 0.028 | 630                     | 0.008 | ring deformation                            |
| <sup>a</sup> The numbering of the vibrational modes is according to calculated spectrum. <sup>b</sup> Intensity relative to the strongest band. <sup>c</sup> Computed absolute intensity: 880.3 km mol <sup>-1</sup> . |      |       |                         |       |                                             |

**Table S14.** Combination and overtone bands for **3** observed in experimental and computed (B3LYP-D3(BJ)/6-311+G(d,p)) spectra.

| Computational         |                           | Experimental              |
|-----------------------|---------------------------|---------------------------|
| Combination/overtone  | $\nu$ (cm <sup>-1</sup> ) | $\nu$ (cm <sup>-1</sup> ) |
| $\nu_{30} + \nu_{36}$ | 1379                      | 1366                      |
| $2\nu_{32}$           | 1371                      | 1341                      |
| $\nu_{31} + \nu_{32}$ | 1344                      | 1313                      |
| $\nu_4 + \nu_{57}$    | 1268                      | 1255                      |
| $2\nu_{29}$           | 1176                      | 1179                      |
| $\nu_{23} + \nu_{32}$ | 1095                      | 1079                      |
| $\nu_{15} + \nu_{30}$ | 862                       | 846                       |

**Table S15.** Infrared spectroscopic data of experimental and computed (B3LYP-D3(BJ)/6-311+G(d,p)) vibrational frequencies of **2** in argon matrix.

| Vibrational Mode      | Experimental              |                | Computational             |                    | Assignments                              |
|-----------------------|---------------------------|----------------|---------------------------|--------------------|------------------------------------------|
|                       | $\nu$ (cm <sup>-1</sup> ) | I <sup>b</sup> | $\nu$ (cm <sup>-1</sup> ) | I <sup>b</sup>     |                                          |
| 74 [ <sup>10</sup> B] | 1809                      | 0.161          | 1848 [ <sup>10</sup> B]   | 0.248              | BN str.                                  |
| 74                    | 1751                      | 1.000          | 1788                      | 1.000 <sup>c</sup> | BN str.                                  |
| 73 <sup>e</sup>       | 1587                      | 0.014          | 1631                      | 0.022              | C=C str. (ring)                          |
| 72                    | 1526                      | 0.123          | 1544                      | 0.116              | C=C str. (ring)                          |
| 71 <sup>e</sup>       | 1476                      | -              | 1518                      | 0.016              | CH scissor (tert-butyl grp)              |
| 69 <sup>e</sup>       | 1468                      | -              | 1519                      | 0.065              | CH scissor (tert-butyl grp)              |
| 61 <sup>d</sup>       | 1393                      | 0.123          | 1436                      | 0.043              | CH bend (ring)                           |
| 60                    | 1378                      | 0.018          | 1430                      | 0.014              | CH wag (tert-butyl grp)                  |
| 59 <sup>d</sup>       | 1365                      | 0.006          | 1399                      | 0.011              | CH str.(tert-butyl grp)                  |
| 58 <sup>d</sup>       | 1364                      | 0.008          | 1398                      | 0.013              | CH scissor (tert-butyl grp)              |
| 57 <sup>d</sup>       | 1345                      | 0.008          | 1372                      | 0.029              | CH bend (ring)                           |
| 56                    | 1293                      | 0.006          | 1306                      | 0.070              | CH wag (methyl grp)                      |
| 55                    | 1265                      | 0.017          | 1299                      | 0.121              | CH wag (methyl grp)                      |
| 54                    | 1257                      | 0.132          | 1283                      | 0.108              | CH bend (ring)                           |
| 53                    | 1219                      | 0.031          | 1248                      | 0.029              | CH bend (ring)                           |
| 49                    | 1155                      | 0.006          | 1162                      | 0.060              | ring str.                                |
| 48                    | 1050                      | 0.567          | 1057                      | 0.417              | ring str.                                |
| 46                    | 1008                      | 0.009          | 1027                      | 0.025              | CH twist (tert-butyl grp, methyl grp)    |
| 45                    | 1005                      | 0.009          | 1023                      | 0.023              | ring breathing                           |
| 40                    | 924                       | 0.013          | 948                       | 0.055              | CH wag (ring), CH twist (tert-butyl grp) |
| 39                    | 900                       | 0.005          | 918                       | 0.017              | CH bend (ring)                           |
| 38                    | 857                       | 0.005          | 878                       | 0.025              | ring deformation                         |
| 37                    | 840                       | 0.385          | 867                       | 0.226              | CH twist (methyl grp)                    |
| 36                    | 809                       | 0.232          | 844                       | 0.376              | CH rock (methyl grp)                     |
| 34                    | 796                       | 0.056          | 810                       | 0.016              | CH wag (ring)                            |
| 33                    | 787                       | 0.005          | 798                       | 0.123              | CH wag (methyl grp)                      |
| 31                    | 736                       | 0.101          | 751                       | 0.144              | CH wag (ring)                            |
| 30                    | 688                       | 0.120          | 701                       | 0.006              | CH twist (methyl grp)                    |



|                                                                                                                                                                                                                                                                                                                                                                                                                                                                                                                                                                                                |     |       |     |       |                                                       |
|------------------------------------------------------------------------------------------------------------------------------------------------------------------------------------------------------------------------------------------------------------------------------------------------------------------------------------------------------------------------------------------------------------------------------------------------------------------------------------------------------------------------------------------------------------------------------------------------|-----|-------|-----|-------|-------------------------------------------------------|
| 29                                                                                                                                                                                                                                                                                                                                                                                                                                                                                                                                                                                             | 684 | 0.010 | 690 | 0.064 | CH wag (ring), CH wag (methyl grp)                    |
| 28                                                                                                                                                                                                                                                                                                                                                                                                                                                                                                                                                                                             | 662 | 0.011 | 674 | 0.026 | ring str., CH wag (methyl grp)                        |
| 27                                                                                                                                                                                                                                                                                                                                                                                                                                                                                                                                                                                             | 600 | 0.031 | 614 | 0.030 | ring breathing, CH twist (tert-butyl grp, methyl grp) |
| 25                                                                                                                                                                                                                                                                                                                                                                                                                                                                                                                                                                                             | 504 | 0.077 | 522 | 0.110 | ring str., CH str. (tert-butyl grp)                   |
| <sup>a</sup> The numbering of the vibrational modes is according to calculated spectrum. <sup>b</sup> Intensity relative to the strongest band. <sup>c</sup> Computed absolute intensity: 352.9 km mol <sup>-1</sup> . <sup>d</sup> these peaks are observed in the irradiation spectrum see Figure1 but are not visible in the difference spectrum as their intensity is low. <sup>e</sup> these peaks are only observed in the experiment with C <sub>2</sub> H <sub>4</sub> but not observed in with CO and Ar due to the overlapping of peaks of <b>3</b> and <b>4</b> in the same region. |     |       |     |       |                                                       |

**Table S16.** Infrared spectroscopic data of experimental and computed (B3LYP-D3(BJ)/6-311+G(d,p)) vibrational frequencies of **4** in argon matrix.

| Vibrational Mode      | Experimental              |                | Computational             |                    | Assignments                          |
|-----------------------|---------------------------|----------------|---------------------------|--------------------|--------------------------------------|
|                       | $\nu$ (cm <sup>-1</sup> ) | I <sup>b</sup> | $\nu$ (cm <sup>-1</sup> ) | I <sup>b</sup>     |                                      |
| 80                    | 2112                      | 1.000          | 2146                      | 1.000 <sup>c</sup> | CO str.                              |
| 79                    | 1595                      | 0.029          | 1608                      | 0.045              | C=C str. (ring)                      |
| 74 [ <sup>10</sup> B] | 1474                      | 0.030          | 1502 [ <sup>10</sup> B]   | 0.025              | BN str., C=C str. (ring)             |
| 71                    | 1467                      | 0.074          | 1484                      | 0.113              | BN str., C=C str. (ring)             |
| 69                    | 1426                      | 0.014          | 1469                      | 0.013              | CH Scissor (methyl grp)              |
| 65                    | 1391                      | 0.003          | 1430                      | 0.006              | CH wag (tert-butyl grp)              |
| 63                    | 1363                      | 0.002          | 1400                      | 0.005              | CH wag (tert-butyl grp)              |
| 60                    | 1254                      | 0.028          | 1294                      | 0.039              | CH wag (methyl grp)                  |
| 58                    | 1232                      | 0.068          | 1265                      | 0.028              | CH bend (ring)                       |
| 54 [ <sup>10</sup> B] | 1128                      | 0.006          | 1159 [ <sup>10</sup> B]   | 0.005              | ring str.                            |
| 54                    | 1122                      | 0.014          | 1154                      | 0.024              | ring str.                            |
| 53                    | 1063                      | 0.068          | 1102                      | 0.093              | ring str.                            |
| 51                    | 1005                      | 0.018          | 1029                      | 0.041              | ring str. ,CH wag (tert-butyl grp)   |
| 52 [ <sup>10</sup> B] |                           |                | 1042 [ <sup>10</sup> B]   | 0.017              | ring str. ,CH wag (tert-butyl grp)   |
| 49                    | 945                       | 0.007          | 977                       | 0.012              | CH twist (ring)                      |
| 48                    | 934                       | -              | 964                       | 0.008              | CH twist (ring)                      |
| 41                    | 835                       | 0.034          | 860                       | 0.060              | CH twist (methyl grp)                |
| 40                    | 822                       | -              | 836                       | 0.097              | CH wag (ring), CH twist (methyl grp) |

|                                                                                                                                                                                                                         |     |       |     |       |                                                  |
|-------------------------------------------------------------------------------------------------------------------------------------------------------------------------------------------------------------------------|-----|-------|-----|-------|--------------------------------------------------|
| 38                                                                                                                                                                                                                      | 805 | 0.026 | 801 | 0.028 | CH wag (ring)                                    |
| 37                                                                                                                                                                                                                      | 778 | 0.016 | 790 | 0.042 | CH wag (methyl grp))                             |
| 35                                                                                                                                                                                                                      | 733 | 0.025 | 751 | 0.073 | CH wag (ring)                                    |
| 33                                                                                                                                                                                                                      | 671 | 0.015 | 672 | 0.021 | CH wag (methyl grp)                              |
| 31                                                                                                                                                                                                                      | 588 | 0.014 | 599 | 0.027 | ring str., CH twist (methyl grp, tert-butyl grp) |
| <sup>a</sup> The numbering of the vibrational modes is according to calculated spectrum. <sup>b</sup> Intensity relative to the strongest band. <sup>c</sup> Computed absolute intensity: 1064.2 km mol <sup>-1</sup> . |     |       |     |       |                                                  |

**Table S17.** Infrared spectroscopic data of experimental and computed (B3LYP-D3(BJ)/6-311+G(d,p)) vibrational frequencies of **4** (C<sup>18</sup>O) in argon matrix.

| Vibrational Mode      | Experimental              |                | Computational             |                    | Assignments                          |
|-----------------------|---------------------------|----------------|---------------------------|--------------------|--------------------------------------|
|                       | $\nu$ (cm <sup>-1</sup> ) | I <sup>b</sup> | $\nu$ (cm <sup>-1</sup> ) | I <sup>b</sup>     |                                      |
| 80                    | 2065                      | 1.000          | 2099                      | 1.000 <sup>c</sup> | CO str.                              |
| 79                    | 1595                      | 0.047          | 1608                      | 0.046              | C=C str. (ring)                      |
| 74 [ <sup>10</sup> B] | 1474                      | 0.045          | 1502 [ <sup>10</sup> B]   | 0.027              | BN str., C=C str. (ring)             |
| 71                    | 1467                      | 0.112          | 1483                      | 0.120              | BN str., C=C str. (ring)             |
| 69                    | 1424                      | 0.011          | 1469                      | 0.014              | CH Scissor (methyl grp)              |
| 65                    | 1391                      | 0.002          | 1430                      | 0.006              | CH wag (tert-butyl grp)              |
| 63                    | 1363                      | 0.003          | 1400                      | 0.005              | CH wag (tert-butyl grp)              |
| 60                    | 1254                      | 0.031          | 1294                      | 0.041              | CH wag (methyl grp)                  |
| 58                    | 1233                      | 0.053          | 1265                      | 0.029              | CH bend (ring)                       |
| 54 [ <sup>10</sup> B] | 1126                      | 0.008          | 1159 [ <sup>10</sup> B]   | 0.005              | ring str.                            |
| 54                    | 1121                      | 0.014          | 1154                      | 0.025              | ring str.                            |
| 53                    | 1063                      | 0.074          | 1102                      | 0.097              | ring str.                            |
| 51                    | 1005                      | 0.024          | 1029                      | 0.043              | ring str. ,CH wag (tert-butyl grp)   |
| 52 [ <sup>10</sup> B] |                           |                | 1042 [ <sup>10</sup> B]   | 0.018              | ring str. ,CH wag (tert-butyl grp)   |
| 49                    | 945                       | 0.006          | 977                       | 0.012              | CH twist (ring)                      |
| 48                    | 938                       | 0.005          | 964                       | 0.008              | CH twist (ring)                      |
| 41                    | 835                       | 0.047          | 860                       | 0.063              | CH twist (methyl grp)                |
| 40                    | 821                       | -              | 836                       | 0.100              | CH wag (ring), CH twist (methyl grp) |
| 38                    | 805                       | 0.036          | 801                       | 0.029              | CH wag (ring)                        |
| 37                    | 778                       | 0.030          | 790                       | 0.044              | CH wag (methyl grp))                 |

|                                                                                                                                                                                                                       |     |       |     |       |                                                  |
|-----------------------------------------------------------------------------------------------------------------------------------------------------------------------------------------------------------------------|-----|-------|-----|-------|--------------------------------------------------|
| 35                                                                                                                                                                                                                    | 732 | 0.025 | 751 | 0.076 | CH wag (ring)                                    |
| 33                                                                                                                                                                                                                    | 671 | 0.023 | 672 | 0.022 | CH wag (methyl grp)                              |
| 31                                                                                                                                                                                                                    | 590 | 0.011 | 598 | 0.029 | ring str., CH twist (methyl grp, tert-butyl grp) |
| <sup>a</sup> The numbering of the vibrational modes is according to calculated spectrum. <sup>b</sup> Intensity relative to the strongest band. <sup>c</sup> Computed absolute intensity: 1024.2 km mol <sup>-1</sup> |     |       |     |       |                                                  |

**Table S18.** Infrared spectroscopic data of experimental and computed (B3LYP-D3(BJ)/6-311+G(d,p)) vibrational frequencies of **4** (<sup>13</sup>CO) in argon matrix.

| Vibrational Mode      | Experimental              |                | Computational             |                    | Assignments                          |
|-----------------------|---------------------------|----------------|---------------------------|--------------------|--------------------------------------|
|                       | $\nu$ (cm <sup>-1</sup> ) | I <sup>b</sup> | $\nu$ (cm <sup>-1</sup> ) | I <sup>b</sup>     |                                      |
| 80                    | 2064                      | 1.000          | 2096                      | 1.000 <sup>c</sup> | CO str.                              |
| 79                    | 1595                      | 0.046          | 1608                      | 0.047              | C=C str. (ring)                      |
| 74 [ <sup>10</sup> B] | 1474                      | 0.052          | 1502 [ <sup>10</sup> B]   | 0.027              | BN str., C=C str. (ring)             |
| 71                    | 1467                      | 0.128          | 1483                      | 0.121              | BN str., C=C str. (ring)             |
| 69                    | 1425                      | 0.012          | 1469                      | 0.014              | CH Scissor (methyl grp)              |
| 65                    | 1392                      | 0.004          | 1430                      | 0.006              | CH wag (tert-butyl grp)              |
| 63                    | 1363                      | 0.006          | 1400                      | 0.005              | CH wag (tert-butyl grp)              |
| 60                    | 1255                      | 0.044          | 1294                      | 0.041              | CH wag (methyl grp)                  |
| 58                    | 1231                      | 0.057          | 1265                      | 0.030              | CH bend (ring)                       |
| 54 [ <sup>10</sup> B] | 1128                      | 0.012          | 1159 [ <sup>10</sup> B]   | 0.005              | ring str.                            |
| 54                    | 1125                      | 0.019          | 1154                      | 0.026              | ring str.                            |
| 53                    | 1063                      | 0.017          | 1102                      | 0.099              | ring str.                            |
| 51                    | 1004                      | 0.036          | 1029                      | 0.044              | ring str. ,CH wag (tert-butyl grp)   |
| 52 [ <sup>10</sup> B] |                           |                | 1042 [ <sup>10</sup> B]   | 0.018              | ring str. ,CH wag (tert-butyl grp)   |
| 49                    | 944                       | 0.007          | 977                       | 0.013              | CH twist (ring)                      |
| 48                    | 939                       | 0.004          | 964                       | 0.008              | CH twist (ring)                      |
| 41                    | 837                       | 0.057          | 860                       | 0.064              | CH twist (methyl grp)                |
| 40                    | 822                       | -              | 836                       | 0.102              | CH wag (ring), CH twist (methyl grp) |
| 38                    | 805                       | 0.046          | 801                       | 0.030              | CH wag (ring)                        |
| 37                    | 777                       | 0.033          | 790                       | 0.045              | CH wag (methyl grp))                 |
| 35                    | 733                       | 0.044          | 751                       | 0.078              | CH wag (ring)                        |
| 33                    | 671                       | 0.026          | 672                       | 0.023              | CH wag (methyl grp)                  |

|                                                                                                                                                                                                                       |     |       |     |       |                                                  |
|-----------------------------------------------------------------------------------------------------------------------------------------------------------------------------------------------------------------------|-----|-------|-----|-------|--------------------------------------------------|
| 31                                                                                                                                                                                                                    | 590 | 0.010 | 596 | 0.032 | ring str., CH twist (methyl grp, tert-butyl grp) |
| <sup>a</sup> The numbering of the vibrational modes is according to calculated spectrum. <sup>b</sup> Intensity relative to the strongest band. <sup>c</sup> Computed absolute intensity: 1004.0 km mol <sup>-1</sup> |     |       |     |       |                                                  |

**Table S19.** Isotopic shifts observed in experimental and computed (B3LYP-D3(BJ)/6-311+G(d,p)) vibrational frequencies of **4** in argon matrix.

| Experimental                      | Computational                     | Experimental                                     | Computational                                    | Experimental                                     | Computational                                    |
|-----------------------------------|-----------------------------------|--------------------------------------------------|--------------------------------------------------|--------------------------------------------------|--------------------------------------------------|
| $\nu$ (cm <sup>-1</sup> )<br>(CO) | $\nu$ (cm <sup>-1</sup> )<br>(CO) | $\nu$ (cm <sup>-1</sup> )<br>(C <sup>18</sup> O) | $\nu$ (cm <sup>-1</sup> )<br>(C <sup>18</sup> O) | $\nu$ (cm <sup>-1</sup> )<br>( <sup>13</sup> CO) | $\nu$ (cm <sup>-1</sup> )<br>( <sup>13</sup> CO) |
| 2112                              | 2146                              | 2065                                             | 2099                                             | 2064                                             | 2096                                             |
| Isotopic Difference               |                                   |                                                  |                                                  |                                                  |                                                  |

**Table S20.** Infrared spectroscopic data of experimental and computed (B3LYP-D3(BJ)/6-311+G(d,p)) vibrational frequencies of **5** in argon matrix.

| Vibrational Mode      | Experimental              |                | Computational             |                | Assignments                                                      |
|-----------------------|---------------------------|----------------|---------------------------|----------------|------------------------------------------------------------------|
|                       | $\nu$ (cm <sup>-1</sup> ) | I <sup>b</sup> | $\nu$ (cm <sup>-1</sup> ) | I <sup>b</sup> |                                                                  |
| 88                    | 1637                      | 0.402          | 1687                      | 0.522          | C=C str. (ring)                                                  |
| 87                    | 1615                      | 0.982          | 1675                      | 0.878          | C=C str. (ring)                                                  |
| 85                    | 1481                      | 0.049          | 1518                      | 0.178          | CH scissor (ter-butyl grp)                                       |
| 79                    | 1457                      | 0.144          | 1486                      | 0.191          | CH rock (ring),<br>CH scissor (tert-butyl grp)                   |
| 77                    | 1433                      | 0.022          | 1469                      | 0.081          | CH scissor (methyl grp)                                          |
| 74                    | 1417                      | 0.336          | 1449                      | 0.139          | CH scissor (C <sub>2</sub> H <sub>4</sub> )                      |
| 73                    | 1411                      | 0.445          | 1443                      | 0.492          | CH rock (ring)                                                   |
| 71 [ <sup>10</sup> B] | 1383                      | 0.441          | 1410                      | 0.338          | BN str., CH wag (C <sub>2</sub> H <sub>4</sub> ), CH bend (ring) |
| 71                    | 1376                      | 0.985          | 1402                      | 1.267          | BN str., CH wag (C <sub>2</sub> H <sub>4</sub> ), CH bend (ring) |
| 68 [ <sup>10</sup> B] | 1337                      | 0.151          | 1358                      | 0.179          | BN str., CH bend (ring)                                          |
| 68                    | 1321                      | 0.331          | 1338                      | 0.137          | BN str., CH bend (ring)                                          |
| 67 [ <sup>10</sup> B] | 1297                      | 0.041          | 1332                      | 0.054          | BN str., CH wag (C <sub>2</sub> H <sub>4</sub> ), CH bend (ring) |
| 67                    | 1290                      | 0.363          | 1320                      | 0.985          | BN str., CH wag (C <sub>2</sub> H <sub>4</sub> ), CH bend (ring) |
| 65                    | 1254                      | 0.333          | 1296                      | 0.269          | CH wag (methyl grp)                                              |

|                                                                                                                                                                                                                         |      |       |      |                |                                                                                                    |
|-------------------------------------------------------------------------------------------------------------------------------------------------------------------------------------------------------------------------|------|-------|------|----------------|----------------------------------------------------------------------------------------------------|
| 63                                                                                                                                                                                                                      | 1207 | 0.297 | 1237 | 0.192          | CH wag (C <sub>2</sub> H <sub>4</sub> ), CH bend (ring), CH twist (tert-butyl grp)                 |
| 58                                                                                                                                                                                                                      | 1145 | 0.115 | 1173 | 0.143          | CH wag (C <sub>2</sub> H <sub>4</sub> ), CH bend (ring)                                            |
| 56                                                                                                                                                                                                                      | 1105 | 0.066 | 1129 | 0.105          | BN str., NC str., CH wag (C <sub>2</sub> H <sub>4</sub> )                                          |
| 55 [ <sup>10</sup> B]                                                                                                                                                                                                   | 1059 | 0.041 | 1076 | 0.107          | Ring breathing, CH wag (C <sub>2</sub> H <sub>4</sub> )                                            |
| 54                                                                                                                                                                                                                      | 1035 | 0.010 | 1040 | 0.063          | Ring str., CH wag (C <sub>2</sub> H <sub>4</sub> )                                                 |
| 52                                                                                                                                                                                                                      | 1026 | 0.023 | 1027 | 0.087          | CH twist (tert-butyl grp)                                                                          |
| 51                                                                                                                                                                                                                      | 974  | 0.069 | 986  | 0.23           | Ring str., CC str. (C <sub>2</sub> H <sub>4</sub> )                                                |
| 47                                                                                                                                                                                                                      | 930  | 0.016 | 950  | 0.037          | CH twist (C <sub>2</sub> H <sub>4</sub> ), CH twist (tert-butyl grp), CH wag (ring)                |
| 43                                                                                                                                                                                                                      | 890  | 0.038 | 908  | 0.045          | Ring breathing, CH wag (C <sub>2</sub> H <sub>4</sub> ), CC str. (C <sub>2</sub> H <sub>4</sub> )  |
| 42                                                                                                                                                                                                                      | 839  | 0.578 | 867  | 0.555          | CH twist (methyl grp)                                                                              |
| 41                                                                                                                                                                                                                      | 828  | 1     | 848  | 1 <sup>c</sup> | Ring str., CH twist (methyl grp), CH wag (C <sub>2</sub> H <sub>4</sub> )                          |
| 39                                                                                                                                                                                                                      | 798  | 0.469 | 819  | 0.14           | Ring str., CH twist (methyl grp), CH wag (tert-butyl grp), CH wag (C <sub>2</sub> H <sub>4</sub> ) |
| 37                                                                                                                                                                                                                      | 777  | 0.044 | 790  | 0.196          | CH twist (methyl grp), CH wag (C <sub>2</sub> H <sub>4</sub> )                                     |
| 34                                                                                                                                                                                                                      | 720  | 0.073 | 730  | 0.188          | CH wag (ring), CH wag (C <sub>2</sub> H <sub>4</sub> )                                             |
| 33                                                                                                                                                                                                                      | 718  | 0.073 | 722  | 0.223          | Ring str., CH wag (ring), CH wag (C <sub>2</sub> H <sub>4</sub> )                                  |
| 31                                                                                                                                                                                                                      | 679  | 0.060 | 679  | 0.160          | CH str. (methyl grp)                                                                               |
| <sup>a</sup> The numbering of the vibrational modes is according to calculated spectrum. <sup>b</sup> Intensity relative to the strongest band. <sup>c</sup> Computed absolute intensity: 1064.2 km mol <sup>-1</sup> . |      |       |      |                |                                                                                                    |

**Table S21.** Infrared spectroscopic data of experimental and computed (B3LYP-D3(BJ)/6-311+G(d,p)) vibrational frequencies of **5** (C<sub>2</sub>D<sub>4</sub>) in argon matrix.

| Vibrational Mode | Experimental              |                | Computational             |                | Assignments                                 |
|------------------|---------------------------|----------------|---------------------------|----------------|---------------------------------------------|
|                  | $\nu$ (cm <sup>-1</sup> ) | I <sup>b</sup> | $\nu$ (cm <sup>-1</sup> ) | I <sup>b</sup> |                                             |
| 88               | 1636                      | 0.308          | 1686                      | 0.369          | C=C str. (ring)                             |
| 87               | 1615                      | 0.930          | 1675                      | 0.588          | C=C str. (ring)                             |
| 86               | 1474                      | 0.092          | 1518                      | 0.122          | CH scissor (tert-butyl grp)                 |
| 80               | 1455                      | 0.135          | 1486                      | 0.149          | CH rock (ring), CH scissor (tert-butyl grp) |
| 78               | 1421                      | 0.040          | 1469                      | 0.055          | CH scissor (methyl grp)                     |

|                                                                                                                                                                                                                       |      |       |      |                |                                                                                                    |
|-----------------------------------------------------------------------------------------------------------------------------------------------------------------------------------------------------------------------|------|-------|------|----------------|----------------------------------------------------------------------------------------------------|
| 75 [ <sup>10</sup> B]                                                                                                                                                                                                 | 1416 | 0.148 | 1451 | 0.111          | CH rock (ring)                                                                                     |
| 75                                                                                                                                                                                                                    | 1411 | 0.190 | 1443 | 0.372          | CH rock (ring)                                                                                     |
| 73 [ <sup>10</sup> B]                                                                                                                                                                                                 | 1380 | 0.127 | 1401 | 0.228          | BN str., CH bend (ring), CH wag (C <sub>2</sub> H <sub>4</sub> )                                   |
| 71                                                                                                                                                                                                                    | 1372 | 1     | 1391 | 1 <sup>c</sup> | BN str., CH bend (ring), CH wag (C <sub>2</sub> H <sub>4</sub> )                                   |
| 70 [ <sup>10</sup> B]                                                                                                                                                                                                 | 1337 | 0.102 | 1358 | 0.112          | BN str., CH bend (ring)                                                                            |
| 70                                                                                                                                                                                                                    | 1322 | 0.321 | 1340 | 0.152          | BN str., CH bend (ring)                                                                            |
| 69 [ <sup>10</sup> B]                                                                                                                                                                                                 | 1298 | 0.098 | 1324 | 0.074          | BN str., CH bend (ring)                                                                            |
| 69                                                                                                                                                                                                                    | 1283 | 0.765 | 1311 | 0.709          | BN str., CH bend (ring)                                                                            |
| 67                                                                                                                                                                                                                    | 1253 | 0.134 | 1296 | 0.189          | CH wag (methyl grp)                                                                                |
| 66                                                                                                                                                                                                                    | 1212 | 0.120 | 1241 | 0.148          | CH bend (ring), CH twist (tert-butyl grp)                                                          |
| 62                                                                                                                                                                                                                    | 1155 | 0.088 | 1181 | 0.171          | BN str., CH wag (C <sub>2</sub> H <sub>4</sub> ), CH bend (ring)                                   |
| 61                                                                                                                                                                                                                    | 1102 | 0.062 | 1125 | 0.068          | CH wag (C <sub>2</sub> H <sub>4</sub> ), CH bend (ring)                                            |
| 60                                                                                                                                                                                                                    | 1088 | 0.058 | 1110 | 0.046          | BN str., NC str., CH wag (C <sub>2</sub> H <sub>4</sub> )                                          |
| 58                                                                                                                                                                                                                    | 1041 | 0.325 | 1050 | 0.488          | Ring breathing, CH wag (C <sub>2</sub> H <sub>4</sub> )                                            |
| 56                                                                                                                                                                                                                    | 1008 | 0.014 | 1027 | 0.08           | CH twist (tert-butyl grp)                                                                          |
| 54 [ <sup>10</sup> B]                                                                                                                                                                                                 | 975  | 0.008 | 987  | 0.038          | Ring str., CC str. (C <sub>2</sub> H <sub>4</sub> )                                                |
| 54                                                                                                                                                                                                                    | 966  | 0.011 | 983  | 0.112          | Ring str., CC str. (C <sub>2</sub> H <sub>4</sub> )                                                |
| 46                                                                                                                                                                                                                    | 878  | 0.010 | 895  | 0.017          | Ring breathing, CH wag (C <sub>2</sub> H <sub>4</sub> ), CC str. (C <sub>2</sub> H <sub>4</sub> )  |
| 45                                                                                                                                                                                                                    | 840  | 0.330 | 867  | 0.401          | CH twist (methyl grp)                                                                              |
| 43                                                                                                                                                                                                                    | 813  | 0.384 | 844  | 0.709          | Ring str., CH twist (methyl grp), CH wag (C <sub>2</sub> H <sub>4</sub> )                          |
| 41                                                                                                                                                                                                                    | 790  | 0.154 | 806  | 0.157          | Ring str., CH twist (methyl grp), CH wag (tert-butyl grp), CH wag (C <sub>2</sub> H <sub>4</sub> ) |
| 38 [ <sup>10</sup> B]                                                                                                                                                                                                 | 778  | 0.013 | 782  | 0.024          | CH twist (methyl grp), CH wag (C <sub>2</sub> H <sub>4</sub> )                                     |
| 38                                                                                                                                                                                                                    | 767  | 0.099 | 780  | 0.081          | CH twist (methyl grp), CH wag (C <sub>2</sub> H <sub>4</sub> )                                     |
| 35                                                                                                                                                                                                                    | 716  | -     | 725  | 0.222          | CH wag (ring), CH wag (C <sub>2</sub> H <sub>4</sub> )                                             |
| 33                                                                                                                                                                                                                    | 680  | 0.030 | 684  | 0.133          | Ring str., CH wag (ring), CH wag (C <sub>2</sub> H <sub>4</sub> )                                  |
| <sup>a</sup> The numbering of the vibrational modes is according to calculated spectrum. <sup>b</sup> Intensity relative to the strongest band. <sup>c</sup> Computed absolute intensity: 1024.2 km mol <sup>-1</sup> |      |       |      |                |                                                                                                    |

**Table S22.** Isotopic shifts observed in experimental and computed (B3LYP-D3(BJ)/6-311+G(d,p)) vibrational frequencies of **5** in argon matrix.

| Experimental                                                  |                                                               | Computational                                                 |                                                               | Isotopic Difference |               |
|---------------------------------------------------------------|---------------------------------------------------------------|---------------------------------------------------------------|---------------------------------------------------------------|---------------------|---------------|
| $\nu$ (cm <sup>-1</sup> )<br>(C <sub>2</sub> H <sub>4</sub> ) | $\nu$ (cm <sup>-1</sup> )<br>(C <sub>2</sub> D <sub>4</sub> ) | $\nu$ (cm <sup>-1</sup> )<br>(C <sub>2</sub> H <sub>4</sub> ) | $\nu$ (cm <sup>-1</sup> )<br>(C <sub>2</sub> D <sub>4</sub> ) | Experimental        | Computational |
| 718                                                           | 680                                                           | ( $\nu_{33}$ ) 721                                            | ( $\nu_{33}$ ) 684                                            | 38                  | 37            |
| 777                                                           | 767                                                           | ( $\nu_{37}$ ) 790                                            | ( $\nu_{38}$ ) 780                                            | 10                  | 10            |
| 798                                                           | 790                                                           | ( $\nu_{39}$ ) 819                                            | ( $\nu_{41}$ ) 806                                            | 8                   | 13            |
| 828                                                           | 813                                                           | ( $\nu_{41}$ ) 848                                            | ( $\nu_{43}$ ) 844                                            | 15                  | 4             |
| 890                                                           | 878                                                           | ( $\nu_{43}$ ) 908                                            | ( $\nu_{46}$ ) 895                                            | 12                  | 13            |
| 974                                                           | 966                                                           | ( $\nu_{51}$ ) 986                                            | ( $\nu_{54}$ ) 984                                            | 8                   | 2             |
| -                                                             | 1041                                                          | ( $\nu_{55}$ ) 1065                                           | ( $\nu_{58}$ ) 1050                                           | -                   | -             |
| 1059                                                          | -                                                             | ( $\nu_{55}$ ) 1076<br>[ <sup>10</sup> B]                     | ( $\nu_{58}$ ) 1051<br>[ <sup>10</sup> B]                     | -                   | -             |
| 1145                                                          | 1102                                                          | ( $\nu_{58}$ ) 1173                                           | ( $\nu_{61}$ ) 1125                                           | 43                  | 48            |
| 1290                                                          | 1283                                                          | ( $\nu_{67}$ ) 1320                                           | ( $\nu_{69}$ ) 1311                                           | 7                   | 9             |
| 1376                                                          | 1372                                                          | ( $\nu_{71}$ ) 1401                                           | ( $\nu_{71}$ ) 1391                                           | 4                   | 10            |

**Table S23.** Cartesian coordinates of stationary points at different level of theories.

| CO                        |            |            |             |                     |            |            |             |
|---------------------------|------------|------------|-------------|---------------------|------------|------------|-------------|
| B3LYP-D3(BJ)/6-311+G(d,p) |            |            |             | M06-2X/6-311+G(d,p) |            |            |             |
| C                         | 0.00000000 | 0.00000000 | -0.64435700 | C                   | 0.00000000 | 0.00000000 | -0.64123200 |
| O                         | 0.00000000 | 0.00000000 | 0.48326800  | O                   | 0.00000000 | 0.00000000 | 0.48092400  |

| C <sub>2</sub> H <sub>4</sub> |            |             |             |                     |            |             |             |
|-------------------------------|------------|-------------|-------------|---------------------|------------|-------------|-------------|
| B3LYP-D3(BJ)/6-311+G(d,p)     |            |             |             | M06-2X/6-311+G(d,p) |            |             |             |
| C                             | 0.00000000 | 0.00000000  | 0.66432900  | C                   | 0.00000000 | 0.00000000  | 0.66289000  |
| C                             | 0.00000000 | 0.00000000  | -0.66432900 | C                   | 0.00000000 | 0.00000000  | -0.66289000 |
| H                             | 0.00000000 | 0.92290900  | -1.23478300 | H                   | 0.00000000 | 0.92339000  | -1.23097700 |
| H                             | 0.00000000 | -0.92290900 | -1.23478300 | H                   | 0.00000000 | -0.92339000 | -1.23097700 |
| H                             | 0.00000000 | -0.92290900 | 1.23478300  | H                   | 0.00000000 | -0.92339000 | 1.23097700  |
| H                             | 0.00000000 | 0.92290900  | 1.23478300  | H                   | 0.00000000 | 0.92339000  | 1.23097700  |

| 2                         |             |             |             |                     |             |             |             |
|---------------------------|-------------|-------------|-------------|---------------------|-------------|-------------|-------------|
| B3LYP-D3(BJ)/6-311+G(d,p) |             |             |             | M06-2X/6-311+G(d,p) |             |             |             |
| C                         | -3.23970600 | 0.32027300  | -0.94728100 | C                   | -3.25472900 | 0.16390800  | -0.94876400 |
| C                         | -1.32800700 | -0.30197100 | 1.51853300  | C                   | -1.28348600 | 0.00504600  | 1.52767600  |
| C                         | -3.04451500 | 1.03071500  | 0.20190200  | C                   | -3.02134300 | 1.07870000  | 0.02942000  |
| C                         | -2.35401000 | 0.56706800  | 1.40211500  | C                   | -2.30797600 | 0.84334300  | 1.28639200  |
| H                         | -3.84158400 | 0.76068500  | -1.73988100 | H                   | -3.85512200 | 0.46248300  | -1.80556500 |
| H                         | -0.97669100 | -0.63346000 | 2.48949100  | H                   | -0.89209500 | -0.13317400 | 2.53073600  |
| H                         | -3.55573000 | 1.98396600  | 0.28427900  | H                   | -3.49540100 | 2.04779900  | -0.07716400 |
| H                         | -2.73484800 | 0.95588200  | 2.34328900  | H                   | -2.66028000 | 1.40583900  | 2.14642300  |
| N                         | -2.78462400 | -0.98558200 | -1.17069300 | N                   | -2.84953600 | -1.17901400 | -0.92466000 |
| N                         | -0.65047900 | -0.88964700 | 0.37197300  | N                   | -0.65802400 | -0.79597400 | 0.49600300  |
| B                         | -1.64712500 | -1.11857000 | -0.54373800 | B                   | -1.69541800 | -1.17045200 | -0.32022200 |
| C                         | 1.58877700  | 1.01743700  | -0.27573300 | C                   | 1.61387800  | 0.95567400  | -0.36974400 |
| C                         | 1.94909700  | -1.41546800 | 1.65870600  | C                   | 1.95997500  | -1.30522500 | 1.73641900  |
| H                         | 1.67437500  | -2.45641500 | 1.84910500  | H                   | 1.70106900  | -2.33371300 | 1.99823700  |
| H                         | 3.03726500  | -1.36839100 | 1.56093000  | H                   | 3.04546300  | -1.24988100 | 1.61730900  |
| H                         | 1.67255800  | -0.82641200 | 2.53648700  | H                   | 1.68957100  | -0.66180600 | 2.57736100  |
| C                         | 1.43584400  | -1.91179500 | -1.36136100 | C                   | 1.31937500  | -2.02872900 | -1.21175000 |
| H                         | 1.13363400  | -2.93811100 | -1.13621400 | H                   | 0.92304100  | -3.00565900 | -0.92375800 |
| H                         | 0.88687500  | -1.58710400 | -2.24978400 | H                   | 0.81063900  | -1.71488200 | -2.12762300 |
| H                         | 2.49873400  | -1.92585600 | -1.61587500 | H                   | 2.37895300  | -2.15566100 | -1.44646800 |
| C                         | 3.06182100  | 1.06500700  | -0.72744400 | C                   | 2.99826500  | 0.87559400  | -1.03343600 |
| H                         | 3.22628500  | 0.49838900  | -1.64819700 | H                   | 2.97434100  | 0.27981900  | -1.95020200 |
| H                         | 3.35952600  | 2.10179600  | -0.92391100 | H                   | 3.34033500  | 1.88161600  | -1.30193800 |
| H                         | 3.73952700  | 0.67258100  | 0.03728700  | H                   | 3.75104500  | 0.44298000  | -0.36591800 |
| C                         | 0.68942000  | 1.56103800  | -1.40159600 | C                   | 0.59573700  | 1.51108100  | -1.37605300 |
| H                         | 0.78018000  | 0.97182500  | -2.31902100 | H                   | 0.48625900  | 0.85932600  | -2.24916600 |
| H                         | -0.36358800 | 1.57245900  | -1.10929100 | H                   | -0.39212200 | 1.63514800  | -0.92326200 |
| H                         | 0.97671500  | 2.59059800  | -1.64617400 | H                   | 0.92644700  | 2.49135600  | -1.73855700 |
| C                         | 1.41670500  | 1.89546600  | 0.97845700  | C                   | 1.69266500  | 1.89447500  | 0.84373600  |
| H                         | 1.68563000  | 2.93312300  | 0.74654300  | H                   | 1.97703500  | 2.90119100  | 0.51577900  |
| H                         | 0.38478600  | 1.89306000  | 1.33657000  | H                   | 0.73032200  | 1.97458900  | 1.35741600  |
| H                         | 2.06237200  | 1.56655900  | 1.79779900  | H                   | 2.44186500  | 1.55957200  | 1.56712100  |
| Si                        | 1.11305600  | -0.78659500 | 0.10275100  | Si                  | 1.09103400  | -0.78378400 | 0.16411200  |



| 3                         |             |             |             |                     |             |             |             |
|---------------------------|-------------|-------------|-------------|---------------------|-------------|-------------|-------------|
| B3LYP-D3(BJ)/6-311+G(d,p) |             |             |             | M06-2X/6-311+G(d,p) |             |             |             |
| C                         | 1.68701500  | 2.80708300  | -0.28495200 | C                   | 1.66622800  | 2.79807500  | -0.26797000 |
| C                         | 0.54357600  | 2.17273600  | 0.10585100  | C                   | 0.52822400  | 2.16082800  | 0.11932000  |
| C                         | 2.91807800  | 0.71402300  | -0.33578700 | C                   | 2.90597500  | 0.70825000  | -0.32504100 |
| C                         | 2.88436800  | 2.07181400  | -0.50659300 | C                   | 2.86662100  | 2.06158000  | -0.49016500 |
| H                         | 1.66671400  | 3.88066000  | -0.42004900 | H                   | 1.64465200  | 3.87131500  | -0.39997100 |
| H                         | -0.35727700 | 2.74797600  | 0.27291000  | H                   | -0.37635400 | 2.73348600  | 0.28838400  |
| H                         | 3.85151700  | 0.18862600  | -0.51528400 | H                   | 3.84286600  | 0.18898900  | -0.50563700 |
| H                         | 3.77166800  | 2.61868500  | -0.81492600 | H                   | 3.75268500  | 2.61177600  | -0.79528500 |
| B                         | 1.64646600  | 0.01916500  | 0.09147800  | B                   | 1.63020400  | 0.01017400  | 0.09971100  |
| N                         | 0.45739300  | 0.81364200  | 0.31018700  | N                   | 0.44512500  | 0.80234900  | 0.31932400  |
| Si                        | -1.16579100 | 0.11757300  | 0.74469500  | Si                  | -1.16759400 | 0.09544200  | 0.74400000  |
| C                         | -0.98906900 | -1.25577200 | 2.00573300  | C                   | -0.99118300 | -1.31410200 | 1.95942200  |
| H                         | -1.96732200 | -1.46410700 | 2.44961500  | H                   | -1.93798100 | -1.44943500 | 2.48992600  |
| H                         | -0.59576000 | -2.17318000 | 1.57123000  | H                   | -0.72227900 | -2.24991500 | 1.47056700  |
| H                         | -0.31445700 | -0.95248500 | 2.81072400  | H                   | -0.21693700 | -1.09304300 | 2.69772800  |
| C                         | -2.15958400 | 1.50051900  | 1.54961300  | C                   | -2.15538000 | 1.45533600  | 1.58565200  |
| H                         | -2.46228100 | 2.29147700  | 0.86049400  | H                   | -2.47597100 | 2.25743100  | 0.91835700  |
| H                         | -3.07221500 | 1.07393100  | 1.97518000  | H                   | -3.05588400 | 1.01401800  | 2.02135800  |
| H                         | -1.60072900 | 1.95881800  | 2.37039900  | H                   | -1.58253500 | 1.90063500  | 2.40377000  |
| C                         | -2.01844500 | -0.45352000 | -0.86158100 | C                   | -2.01321400 | -0.43505900 | -0.86589400 |
| C                         | -1.23795500 | -1.59354700 | -1.53901600 | C                   | -1.18106300 | -1.49126300 | -1.60591600 |
| H                         | -1.12354100 | -2.45955500 | -0.88280000 | H                   | -0.99225700 | -2.37333600 | -0.98849800 |
| H                         | -1.77207300 | -1.92366900 | -2.43822600 | H                   | -1.71640400 | -1.81644500 | -2.50578700 |
| H                         | -0.23875700 | -1.27566600 | -1.84328000 | H                   | -0.21271400 | -1.09175000 | -1.91868500 |
| C                         | -2.12516300 | 0.72944400  | -1.84195400 | C                   | -2.19980600 | 0.78113600  | -1.78469900 |
| H                         | -2.62001200 | 0.40701700  | -2.76569400 | H                   | -2.67581500 | 0.47014600  | -2.72187200 |
| H                         | -2.71343500 | 1.55412600  | -1.42942000 | H                   | -2.83968700 | 1.54352400  | -1.33111000 |
| H                         | -1.14045500 | 1.11846000  | -2.11474000 | H                   | -1.24144200 | 1.24406400  | -2.03997400 |
| C                         | -3.43366500 | -0.95309200 | -0.50664900 | C                   | -3.38743800 | -1.02764700 | -0.51453200 |
| H                         | -3.95205500 | -1.28456700 | -1.41404200 | H                   | -3.90676900 | -1.33420800 | -1.42972700 |
| H                         | -3.40444400 | -1.80329200 | 0.18117100  | H                   | -3.29515400 | -1.91192600 | 0.12340300  |
| H                         | -4.04424400 | -0.16868500 | -0.05019600 | H                   | -4.02674300 | -0.30204300 | -0.00213300 |
| N                         | 1.51590000  | -1.43072400 | 0.29162000  | N                   | 1.49515000  | -1.44282600 | 0.29724100  |
| N                         | 3.25425900  | -2.97921200 | -0.04659200 | N                   | 3.30631700  | -2.88452300 | -0.07378800 |
| N                         | 2.45287300  | -2.19149900 | 0.10275800  | N                   | 2.46715500  | -2.15830500 | 0.09287600  |

| 4_comp                    |             |             |             |                     |             |             |             |
|---------------------------|-------------|-------------|-------------|---------------------|-------------|-------------|-------------|
| B3LYP-D3(BJ)/6-311+G(d,p) |             |             |             | M06-2X/6-311+G(d,p) |             |             |             |
| C                         | -2.34416700 | 2.03077200  | -0.94334700 | C                   | -2.39978700 | 1.95309200  | -0.93564700 |
| C                         | -0.64739600 | 1.02342100  | 1.55313500  | C                   | -0.61653500 | 1.02656100  | 1.51424700  |
| C                         | -1.68404300 | 2.75318100  | 0.00764000  | C                   | -1.71365000 | 2.70311400  | -0.03372700 |
| C                         | -1.14260200 | 2.24558200  | 1.26563300  | C                   | -1.13510100 | 2.23460100  | 1.22744100  |
| H                         | -2.75831700 | 2.55187700  | -1.80430400 | H                   | -2.82393400 | 2.44841300  | -1.80651600 |
| H                         | -0.36273900 | 0.75400700  | 2.56438900  | H                   | -0.28074100 | 0.78062300  | 2.51694300  |
| H                         | -1.65884300 | 3.83003900  | -0.12142200 | H                   | -1.67195500 | 3.77197000  | -0.21035000 |
| H                         | -1.15899100 | 2.94239600  | 2.09988500  | H                   | -1.13393500 | 2.94849200  | 2.04614800  |
| N                         | -2.60533000 | 0.65480700  | -0.87037200 | N                   | -2.68371300 | 0.58300400  | -0.81391500 |
| N                         | -0.49926100 | -0.02691300 | 0.55913400  | N                   | -0.50156600 | -0.03355700 | 0.53775500  |
| B                         | -1.59366400 | 0.09849300  | -0.25831700 | B                   | -1.63134400 | 0.07733600  | -0.23143000 |
| C                         | 2.30718400  | 0.28883100  | -0.47409300 | C                   | 2.31263300  | 0.31792100  | -0.41290100 |
| C                         | 1.58730100  | -1.62781500 | 1.89354200  | C                   | 1.54102300  | -1.74820800 | 1.78119800  |
| H                         | 0.84224400  | -2.32673100 | 2.28296700  | H                   | 0.80850500  | -2.50045800 | 2.08285500  |
| H                         | 2.52885400  | -2.17160700 | 1.77655700  | H                   | 2.50588200  | -2.24680700 | 1.65485000  |
| H                         | 1.74804600  | -0.85087300 | 2.64493800  | H                   | 1.64726500  | -1.03042400 | 2.59842800  |
| C                         | 0.55214300  | -2.25566700 | -0.96354200 | C                   | 0.54167600  | -2.14715300 | -1.12813400 |
| H                         | -0.22123200 | -2.90462000 | -0.54517600 | H                   | -0.28573100 | -2.77795800 | -0.79410700 |
| H                         | 0.16857300  | -1.83705400 | -1.89826000 | H                   | 0.23508100  | -1.64984700 | -2.05277700 |
| H                         | 1.41638500  | -2.87808500 | -1.20934500 | H                   | 1.38623800  | -2.79902200 | -1.36434000 |
| C                         | 3.53419800  | -0.51393700 | -0.94918800 | C                   | 3.45686600  | -0.46149600 | -1.08116500 |
| H                         | 3.27773100  | -1.22228900 | -1.74186400 | H                   | 3.11658600  | -0.99727100 | -1.97176900 |
| H                         | 4.29415700  | 0.16640800  | -1.35143100 | H                   | 4.24598100  | 0.23181000  | -1.39402700 |
| H                         | 4.00028700  | -1.07411100 | -0.13243500 | H                   | 3.91276000  | -1.18822000 | -0.40040100 |
| C                         | 1.68813100  | 1.03629100  | -1.66992800 | C                   | 1.67870700  | 1.27282100  | -1.43478000 |
| H                         | 1.36154100  | 0.34979700  | -2.45677700 | H                   | 1.23985200  | 0.73310300  | -2.28036800 |
| H                         | 0.82773000  | 1.63961400  | -1.36946400 | H                   | 0.89256200  | 1.88407100  | -0.98218100 |
| H                         | 2.42891000  | 1.71192100  | -2.11391400 | H                   | 2.44230600  | 1.94826600  | -1.83779600 |
| C                         | 2.75323900  | 1.31252300  | 0.58728700  | C                   | 2.87861000  | 1.13215000  | 0.76030300  |
| H                         | 3.48649900  | 2.00356300  | 0.15408600  | H                   | 3.61776100  | 1.85212200  | 0.38985200  |
| H                         | 1.91401200  | 1.90829700  | 0.95359100  | H                   | 2.09700300  | 1.69820400  | 1.27514400  |
| H                         | 3.22829600  | 0.82886300  | 1.44564200  | H                   | 3.37966900  | 0.49262300  | 1.49287500  |
| Si                        | 1.02267400  | -0.91203400 | 0.25517100  | Si                  | 1.00810000  | -0.91225800 | 0.19485400  |
| C                         | -4.16904200 | -2.25609300 | -0.18014400 | C                   | -4.07677000 | -2.24604100 | -0.09845900 |
| O                         | -3.07372500 | -2.47039800 | -0.00522100 | O                   | -2.97461600 | -2.41063100 | 0.05620000  |

| 4_comp'                   |             |             |             |  |                     |             |             |             |  |
|---------------------------|-------------|-------------|-------------|--|---------------------|-------------|-------------|-------------|--|
| B3LYP-D3(BJ)/6-311+G(d,p) |             |             |             |  | M06-2X/6-311+G(d,p) |             |             |             |  |
| C                         | 2.65479200  | -1.46222200 | -1.05956800 |  | C                   | 2.45673000  | -1.73921500 | -0.84256900 |  |
| C                         | 0.90509000  | -0.91266300 | 1.53692600  |  | C                   | 0.91506400  | -0.71371300 | 1.72385700  |  |
| C                         | 2.17342300  | -2.34237200 | -0.13504600 |  | C                   | 2.00267300  | -2.43866900 | 0.23122900  |  |
| C                         | 1.59904700  | -2.00840800 | 1.16505100  |  | C                   | 1.55426100  | -1.87643700 | 1.50656000  |  |
| H                         | 3.12988300  | -1.85372000 | -1.95692100 |  | H                   | 2.82519800  | -2.29366600 | -1.70319400 |  |
| H                         | 0.61788300  | -0.75364100 | 2.57079000  |  | H                   | 0.69132300  | -0.36880100 | 2.72822800  |  |
| H                         | 2.34241700  | -3.39714100 | -0.32472200 |  | H                   | 2.08285000  | -3.51900700 | 0.18589900  |  |
| H                         | 1.77445900  | -2.73230900 | 1.95702000  |  | H                   | 1.77197300  | -2.46498800 | 2.39315900  |  |
| N                         | 2.66049600  | -0.07035500 | -0.91770100 |  | N                   | 2.56862800  | -0.34382700 | -0.92380500 |  |
| N                         | 0.52958500  | 0.14395500  | 0.61223400  |  | N                   | 0.51853400  | 0.17672800  | 0.65333100  |  |
| B                         | 1.60784600  | 0.29026000  | -0.22841000 |  | B                   | 1.55909400  | 0.12634300  | -0.24109900 |  |
| C                         | -2.17129700 | -0.65659500 | -0.44702400 |  | C                   | -2.10446200 | -0.59468500 | -0.55688400 |  |
| C                         | -1.81960400 | 1.15016200  | 2.08256100  |  | C                   | -1.88049400 | 1.03543000  | 2.09200900  |  |
| H                         | -1.22576000 | 1.94728700  | 2.53787100  |  | H                   | -1.24768800 | 1.71613400  | 2.66725200  |  |
| H                         | -2.85317800 | 1.50032800  | 2.01187700  |  | H                   | -2.86975000 | 1.49203900  | 2.00695700  |  |
| H                         | -1.80918800 | 0.29201600  | 2.75895200  |  | H                   | -1.98957000 | 0.10894100  | 2.66093300  |  |
| C                         | -0.99951800 | 2.22999700  | -0.70574600 |  | C                   | -1.00071200 | 2.30816000  | -0.60058400 |  |
| H                         | -0.39425600 | 2.99928900  | -0.22015200 |  | H                   | -0.52465800 | 3.09362200  | -0.00906600 |  |
| H                         | -0.53349800 | 1.99317000  | -1.66629000 |  | H                   | -0.39265500 | 2.14972400  | -1.49599300 |  |
| H                         | -1.98441400 | 2.65709200  | -0.91120600 |  | H                   | -1.97980200 | 2.67076500  | -0.92365900 |  |
| C                         | -3.55186400 | -0.09160500 | -0.83451100 |  | C                   | -3.58207500 | -0.18917100 | -0.66382900 |  |
| H                         | -3.47172400 | 0.72398900  | -1.55860600 |  | H                   | -3.70910800 | 0.77392900  | -1.16820300 |  |
| H                         | -4.16284800 | -0.87774800 | -1.29383900 |  | H                   | -4.13337700 | -0.93743300 | -1.24488000 |  |
| H                         | -4.10276100 | 0.28059500  | 0.03503200  |  | H                   | -4.05620000 | -0.12386300 | 0.32006500  |  |
| C                         | -1.44158300 | -1.14220400 | -1.71335700 |  | C                   | -1.50612500 | -0.73466600 | -1.96469600 |  |
| H                         | -1.28755900 | -0.33259500 | -2.43305400 |  | H                   | -1.60356300 | 0.18837400  | -2.54353000 |  |
| H                         | -0.46629900 | -1.57517700 | -1.47728600 |  | H                   | -0.44581900 | -1.00832400 | -1.92825800 |  |
| H                         | -2.03556700 | -1.91542000 | -2.21516600 |  | H                   | -2.02811500 | -1.52605400 | -2.51491400 |  |
| C                         | -2.36345700 | -1.84579100 | 0.51336900  |  | C                   | -1.99482200 | -1.94540600 | 0.16559800  |  |
| H                         | -2.94624300 | -2.63322800 | 0.02014800  |  | H                   | -2.57733700 | -2.70146900 | -0.37405400 |  |
| H                         | -1.40817800 | -2.28081800 | 0.81553400  |  | H                   | -0.95850600 | -2.29110400 | 0.21124100  |  |
| H                         | -2.90672600 | -1.55571300 | 1.41734400  |  | H                   | -2.38503000 | -1.89850500 | 1.18703100  |  |
| Si                        | -1.14584300 | 0.71388200  | 0.38749700  |  | Si                  | -1.15175100 | 0.73310200  | 0.39604700  |  |
| C                         | 2.70398700  | 2.77504100  | -0.13645200 |  | C                   | 2.73568200  | 2.63614800  | -0.64054600 |  |
| O                         | 3.54221100  | 3.45270100  | -0.46571300 |  | O                   | 3.59936100  | 3.20960600  | -1.06819400 |  |

| 4                         |             |             |             |                     |             |                         |
|---------------------------|-------------|-------------|-------------|---------------------|-------------|-------------------------|
| B3LYP-D3(BJ)/6-311+G(d,p) |             |             |             | M06-2X/6-311+G(d,p) |             |                         |
| C                         | 2.42502200  | -1.71401100 | -0.99516600 | C                   | 2.42027100  | -1.65526500 -1.00224500 |
| C                         | 1.01210400  | -0.66239000 | 1.60510100  | C                   | 0.97431200  | -0.77341200 1.63890700  |
| C                         | 2.08916100  | -2.40257800 | 0.15098800  | C                   | 2.04047200  | -2.41153800 0.06569100  |
| C                         | 1.66288000  | -1.84003100 | 1.40163900  | C                   | 1.61677500  | -1.92686300 1.36754400  |
| H                         | 2.81869900  | -2.29166700 | -1.83046000 | H                   | 2.80245800  | -2.17212900 -1.88007700 |
| H                         | 0.77570300  | -0.36356600 | 2.62493800  | H                   | 0.73934800  | -0.52215500 2.67178000  |
| H                         | 2.30141000  | -3.46777000 | 0.15245900  | H                   | 2.18444300  | -3.48390900 -0.02194100 |
| H                         | 1.86472300  | -2.42806700 | 2.29248200  | H                   | 1.83061400  | -2.56741900 2.21788400  |
| N                         | 2.49316400  | -0.36771300 | -1.10078800 | N                   | 2.51287000  | -0.28716300 -1.02110400 |
| N                         | 0.58928000  | 0.19945200  | 0.57190400  | N                   | 0.57331500  | 0.17019700 0.65428200   |
| B                         | 1.74116000  | 0.44225300  | -0.30611800 | B                   | 1.70117800  | 0.43747400 -0.22314400  |
| C                         | -2.08821300 | -0.58410500 | -0.54476900 | C                   | -2.03581800 | -0.52056200 -0.64957700 |
| C                         | -1.79574600 | 1.10223100  | 2.06007600  | C                   | -1.87384800 | 0.82933200 2.14421300   |
| H                         | -1.19562500 | 1.84721100  | 2.59038600  | H                   | -1.28283800 | 1.47914700 2.79505300   |
| H                         | -2.81255600 | 1.49475500  | 1.97280100  | H                   | -2.87865500 | 1.25329500 2.07221700   |
| H                         | -1.84276700 | 0.20403800  | 2.68096000  | H                   | -1.95971900 | -0.14611800 2.62952300  |
| C                         | -0.98593400 | 2.32400300  | -0.66306300 | C                   | -0.99612900 | 2.38448300 -0.37990300  |
| H                         | -0.47270900 | 3.12403100  | -0.12207500 | H                   | -0.51454500 | 3.11815000 0.27296700   |
| H                         | -0.46629200 | 2.16759000  | -1.61232100 | H                   | -0.44296000 | 2.34697700 -1.32320200  |
| H                         | -1.99206500 | 2.68178600  | -0.89823600 | H                   | -1.99691900 | 2.75939500 -0.60995600  |
| C                         | -3.54260400 | -0.10991800 | -0.72104400 | C                   | -3.51278500 | -0.11426700 -0.74691700 |
| H                         | -3.60579300 | 0.80925500  | -1.31120000 | H                   | -3.63582800 | 0.89044500 -1.16358800  |
| H                         | -4.12772700 | -0.87457100 | -1.24652300 | H                   | -4.05031600 | -0.80812400 -1.40410600 |
| H                         | -4.03315300 | 0.07137400  | 0.23994800  | H                   | -4.00539800 | -0.14037600 0.22973600  |
| C                         | -1.46371300 | -0.84916500 | -1.92700000 | C                   | -1.40948200 | -0.52825200 -2.05169800 |
| H                         | -1.48580500 | 0.04119400  | -2.56227300 | H                   | -1.50893100 | 0.44224700 -2.54727400  |
| H                         | -0.42565000 | -1.17998400 | -1.84176500 | H                   | -0.34662900 | -0.78958200 -2.01367800 |
| H                         | -2.02174500 | -1.63640500 | -2.44852500 | H                   | -1.91069500 | -1.27199000 -2.68247600 |
| C                         | -2.07287100 | -1.89087800 | 0.27025400  | C                   | -1.93092700 | -1.93223300 -0.05375000 |
| H                         | -2.65379000 | -2.66363700 | -0.24834600 | H                   | -2.48594100 | -2.64230300 -0.67867900 |
| H                         | -1.05756200 | -2.27103800 | 0.40193200  | H                   | -0.89102900 | -2.26728600 -0.00714300 |
| H                         | -2.51763400 | -1.75982900 | 1.26132300  | H                   | -2.35315500 | -1.98377900 0.95479000  |
| Si                        | -1.06914100 | 0.74944900  | 0.36197600  | Si                  | -1.08610300 | 0.69928800 0.44754800   |
| C                         | 2.36473600  | 1.86965700  | -0.27597900 | C                   | 2.32472300  | 1.92778100 -0.25113600  |
| O                         | 2.75080900  | 2.93908700  | -0.26207600 | O                   | 2.76219600  | 2.95895700 -0.32260100  |

| 4_(2+1)                   |             |             |             |                     |             |                         |
|---------------------------|-------------|-------------|-------------|---------------------|-------------|-------------------------|
| B3LYP-D3(BJ)/6-311+G(d,p) |             |             |             | M06-2X/6-311+G(d,p) |             |                         |
| C                         | 3.66899500  | -0.43420100 | -0.42701600 | C                   | 3.67512500  | -0.48656700 -0.41110700 |
| C                         | 0.79603100  | -1.75371500 | 0.33086200  | C                   | 0.76454400  | -1.72839900 0.33285900  |
| C                         | 3.29689800  | -1.72317000 | -0.39062200 | C                   | 3.28050100  | -1.76176500 -0.34919800 |
| C                         | 1.98871600  | -2.28664000 | -0.01891700 | C                   | 1.94786100  | -2.28875800 0.01105700  |
| H                         | 4.65685100  | -0.09905800 | -0.71085300 | H                   | 4.67339100  | -0.17276000 -0.68154500 |
| H                         | 0.00967900  | -2.46813900 | 0.54836900  | H                   | -0.04026700 | -2.42590500 0.54859900  |
| H                         | 4.04909900  | -2.45559100 | -0.66303500 | H                   | 4.02226100  | -2.51583400 -0.58660900 |
| H                         | 1.97519700  | -3.37118700 | -0.02795500 | H                   | 1.91036200  | -3.37218800 0.01920200  |
| N                         | 2.71692500  | 0.53679900  | -0.07830400 | N                   | 2.72871500  | 0.50789900 -0.10830300  |
| N                         | 0.37283100  | -0.40458800 | 0.47719700  | N                   | 0.36368800  | -0.37144300 0.45306400  |
| B                         | 1.36123400  | 0.57723600  | 0.26799200  | B                   | 1.37414800  | 0.58364400 0.22862400   |
| C                         | -2.24954400 | 0.06225600  | -0.90347100 | C                   | -2.27787300 | 0.03908200 -0.88304500  |
| C                         | -2.07672300 | -1.26981200 | 1.91653100  | C                   | -2.05241700 | -1.17761800 1.96258200  |
| H                         | -1.45336300 | -1.39692400 | 2.80585200  | H                   | -1.37021000 | -1.34370500 2.80015400  |
| H                         | -3.06747400 | -0.94772400 | 2.24923200  | H                   | -2.99305100 | -0.79682000 2.36945700  |
| H                         | -2.19477600 | -2.24730500 | 1.44316400  | H                   | -2.26603300 | -2.14435900 1.50027100  |
| C                         | -1.32780600 | 1.70628500  | 1.58966700  | C                   | -1.30468800 | 1.78415600 1.50135000   |
| H                         | -0.83318800 | 1.65690700  | 2.56362700  | H                   | -0.82974600 | 1.77033000 2.48558300   |
| H                         | -0.80582800 | 2.45513500  | 0.99009000  | H                   | -0.75381400 | 2.49025300 0.87533500   |
| H                         | -2.35002500 | 2.05899600  | 1.75285100  | H                   | -2.32118000 | 2.16711300 1.62600700   |
| C                         | -3.73938600 | 0.37910500  | -0.67261400 | C                   | -3.78180600 | 0.20081100 -0.61617200  |
| H                         | -3.88080300 | 1.34899300  | -0.18673100 | H                   | -4.00578500 | 1.13398400 -0.08983000  |
| H                         | -4.27094300 | 0.41431600  | -1.63099900 | H                   | -4.33151700 | 0.22037000 -1.56424400  |
| H                         | -4.22770700 | -0.38187000 | -0.05669000 | H                   | -4.17895200 | -0.62783400 -0.02230600 |
| C                         | -1.62760600 | 1.14894200  | -1.79975300 | C                   | -1.78843100 | 1.19036600 -1.77309000  |
| H                         | -1.71647800 | 2.14515500  | -1.35858600 | H                   | -2.00039600 | 2.16623700 -1.32765600  |
| H                         | -0.56723900 | 0.95988000  | -1.99059000 | H                   | -0.71090700 | 1.13045100 -1.95853700  |
| H                         | -2.13491000 | 1.17275500  | -2.77148300 | H                   | -2.29106900 | 1.15355600 -2.74643500  |
| C                         | -2.12139200 | -1.30203100 | -1.60639800 | C                   | -2.02984000 | -1.29365900 -1.60470400 |
| H                         | -2.64298800 | -1.27856100 | -2.57069000 | H                   | -2.59216800 | -1.31931600 -2.54535900 |
| H                         | -1.07771400 | -1.56011500 | -1.80523500 | H                   | -0.97203300 | -1.43069900 -1.84755200 |
| H                         | -2.56496600 | -2.11037900 | -1.01746400 | H                   | -2.35671300 | -2.15114500 -1.00747000 |
| Si                        | -1.33960900 | 0.02235900  | 0.76915800  | Si                  | -1.33655000 | 0.06953100 0.75959600   |
| C                         | 2.19234900  | 1.84194900  | 0.03619800  | C                   | 2.25509800  | 1.82140500 -0.00251900  |
| O                         | 2.57680500  | 2.97077800  | -0.09876500 | O                   | 2.68419000  | 2.92838900 -0.13074000  |

| 4_(2+2)                   |             |             |             |                     |             |                         |
|---------------------------|-------------|-------------|-------------|---------------------|-------------|-------------------------|
| B3LYP-D3(BJ)/6-311+G(d,p) |             |             |             | M06-2X/6-311+G(d,p) |             |                         |
| C                         | 3.72828000  | -0.10805200 | -0.43733500 | C                   | 3.72550000  | -0.12156500 -0.43849200 |
| C                         | 0.96980300  | -1.59833100 | 0.35444600  | C                   | 0.96287200  | -1.58496300 0.37861100  |
| C                         | 3.45644600  | -1.42429600 | -0.33688600 | C                   | 3.45066300  | -1.42948500 -0.33258300 |
| C                         | 2.20094800  | -2.06190000 | 0.03230600  | C                   | 2.18698100  | -2.05532500 0.05977200  |
| H                         | 4.69876300  | 0.27429000  | -0.72881900 | H                   | 4.68904700  | 0.26353500 -0.74871300  |
| H                         | 0.22711600  | -2.35130600 | 0.58437900  | H                   | 0.21856600  | -2.33542600 0.62254700  |
| H                         | 4.27135200  | -2.10298600 | -0.55905800 | H                   | 4.25458600  | -2.11645000 -0.56637500 |
| H                         | 2.25629100  | -3.14516100 | 0.05432700  | H                   | 2.23766500  | -3.13773600 0.09963100  |
| N                         | 2.75213500  | 0.82832000  | -0.16810000 | N                   | 2.75136800  | 0.81610700 -0.14833600  |
| N                         | 0.46592500  | -0.27649000 | 0.45394900  | N                   | 0.45762600  | -0.26273600 0.45996400  |
| B                         | 1.33194900  | 0.78713200  | 0.21442500  | B                   | 1.33352200  | 0.79210600 0.22105100   |
| C                         | -2.19255400 | -0.05019300 | -0.91785400 | C                   | -2.18598500 | -0.07195900 -0.91249400 |
| C                         | -1.88711800 | -1.40192000 | 1.88411000  | C                   | -1.88941200 | -1.35352300 1.90245600  |
| H                         | -1.22883300 | -1.50692700 | 2.75080600  | H                   | -1.19430000 | -1.49282900 2.73437800  |
| H                         | -2.88728300 | -1.16313300 | 2.25693900  | H                   | -2.85779300 | -1.07012900 2.32381300  |
| H                         | -1.94910800 | -2.37084900 | 1.38410700  | H                   | -2.02113500 | -2.31528200 1.40145500  |
| C                         | -1.48432200 | 1.63228500  | 1.62896500  | C                   | -1.47881900 | 1.67562500 1.57041700   |
| H                         | -0.98365000 | 1.61332700  | 2.60073400  | H                   | -0.98758900 | 1.68245400 2.54660000   |
| H                         | -1.05799600 | 2.45399400  | 1.05257200  | H                   | -1.04203600 | 2.47626100 0.97156200   |
| H                         | -2.54349200 | 1.84212800  | 1.80395200  | H                   | -2.53803900 | 1.89770100 1.72800100   |
| C                         | -3.70897100 | 0.09544300  | -0.68287300 | C                   | -3.70409100 | -0.07009400 -0.67514400 |
| H                         | -3.95716000 | 1.03837200  | -0.18712400 | H                   | -4.03223500 | 0.82374000 -0.13554200  |
| H                         | -4.24033000 | 0.08184800  | -1.64167800 | H                   | -4.23262700 | -0.08477400 -1.63510700 |
| H                         | -4.10986400 | -0.72213900 | -0.07635700 | H                   | -4.02721600 | -0.94831600 -0.10807300 |
| C                         | -1.69764500 | 1.11344400  | -1.79620800 | C                   | -1.79824000 | 1.14806800 -1.76012800  |
| H                         | -1.88606200 | 2.08578700  | -1.33437500 | H                   | -2.11085700 | 2.08453800 -1.29046700  |
| H                         | -0.62549200 | 1.04480500  | -1.99827600 | H                   | -0.71801200 | 1.20302300 -1.92704800  |
| H                         | -2.21505400 | 1.09934100  | -2.76268600 | H                   | -2.28136100 | 1.08986400 -2.74218900  |
| C                         | -1.91478200 | -1.38142800 | -1.64048000 | C                   | -1.78995300 | -1.35327200 -1.66051300 |
| H                         | -2.43449600 | -1.39875300 | -2.60572200 | H                   | -2.32522500 | -1.40731500 -2.61551000 |
| H                         | -0.84907800 | -1.52174600 | -1.83927300 | H                   | -0.71856800 | -1.37948000 -1.87914000 |
| H                         | -2.26883600 | -2.24258400 | -1.06605300 | H                   | -2.04384700 | -2.25498800 -1.09388600 |
| Si                        | -1.30050300 | -0.01408000 | 0.76244600  | Si                  | -1.29920000 | 0.00707700 0.75613900   |
| O                         | 1.25519900  | 2.17787200  | 0.17730200  | O                   | 1.26192800  | 2.17936100 0.15599000   |
| C                         | 2.65699600  | 2.17950800  | -0.23054700 | C                   | 2.63611600  | 2.15874600 -0.26631200  |

| TS <sub>4</sub> _comp - 4_(2+2) |             |             |             |                     |             |                         |
|---------------------------------|-------------|-------------|-------------|---------------------|-------------|-------------------------|
| B3LYP-D3(BJ)/6-311+G(d,p)       |             |             |             | M06-2X/6-311+G(d,p) |             |                         |
| C                               | 3.02606500  | -1.15947000 | -0.88604200 | C                   | 2.90395400  | -1.24595600 -0.89427000 |
| C                               | 0.85095300  | -0.88258700 | 1.40622500  | C                   | 0.81930000  | -0.81932400 1.45366500  |
| C                               | 2.60496600  | -2.08129500 | 0.01770200  | C                   | 2.44597100  | -2.13090600 0.01989300  |
| C                               | 1.75603200  | -1.85626200 | 1.17469800  | C                   | 1.65892000  | -1.84195200 1.21453700  |
| H                               | 3.71698100  | -1.46901500 | -1.66564600 | H                   | 3.54039300  | -1.60887000 -1.69631300 |
| H                               | 0.34418800  | -0.85702300 | 2.36636700  | H                   | 0.34173700  | -0.74251000 2.42746600  |
| H                               | 2.99754300  | -3.08768900 | -0.09047600 | H                   | 2.75667900  | -3.16357200 -0.10015900 |
| H                               | 1.86697400  | -2.57455900 | 1.98168300  | H                   | 1.76716700  | -2.54950500 2.03070500  |
| N                               | 2.69645800  | 0.18355300  | -0.87093000 | N                   | 2.68673100  | 0.12575700 -0.87338400  |
| N                               | 0.48674500  | 0.16622100  | 0.51080100  | N                   | 0.49293600  | 0.22548700 0.54065600   |
| B                               | 1.59490000  | 0.63894800  | -0.21383900 | B                   | 1.61207600  | 0.61590800 -0.21627800  |
| C                               | -2.18950000 | -0.66476100 | -0.53559100 | C                   | -2.14881700 | -0.67227800 -0.49513100 |
| C                               | -1.89024100 | 1.09572500  | 2.03153100  | C                   | -1.91440400 | 1.26125800 1.92830000   |
| H                               | -1.30306700 | 1.88098900  | 2.51533400  | H                   | -1.38445000 | 2.12372400 2.33933700   |
| H                               | -2.92296400 | 1.44804600  | 1.95691400  | H                   | -2.96667100 | 1.53575000 1.81260100   |
| H                               | -1.89000000 | 0.22142900  | 2.68679100  | H                   | -1.86719500 | 0.45229500 2.66127100   |
| C                               | -1.12231500 | 2.26333200  | -0.72631100 | C                   | -1.05392200 | 2.21631200 -0.88663500  |
| H                               | -0.54635100 | 3.05014200  | -0.23418800 | H                   | -0.44014400 | 3.01274500 -0.45975400  |
| H                               | -0.66687700 | 2.07476200  | -1.70237500 | H                   | -0.61611800 | 1.93092100 -1.84785900  |
| H                               | -2.13043700 | 2.64740900  | -0.90279900 | H                   | -2.04626500 | 2.62846400 -1.08531700  |
| C                               | -3.60174300 | -0.14701100 | -0.86999900 | C                   | -3.44160900 | -0.12669900 -1.12149000 |
| H                               | -3.57405000 | 0.70357100  | -1.55679000 | H                   | -3.23281500 | 0.56349000 -1.94363000  |
| H                               | -4.18706800 | -0.93828500 | -1.35336900 | H                   | -4.03781200 | -0.95252500 -1.52647100 |
| H                               | -4.14921000 | 0.15980500  | 0.02663000  | H                   | -4.06495600 | 0.39656100 -0.38854500  |
| C                               | -1.46873600 | -1.06866100 | -1.83513900 | C                   | -1.29112000 | -1.33395500 -1.58384600 |
| H                               | -1.38051600 | -0.22916300 | -2.53112900 | H                   | -0.98452100 | -0.61810600 -2.35363900 |
| H                               | -0.46340100 | -1.44869900 | -1.63663000 | H                   | -0.38586900 | -1.78281800 -1.16452000 |
| H                               | -2.02996000 | -1.85934100 | -2.34726700 | H                   | -1.86355300 | -2.12576000 -2.08107400 |
| C                               | -2.30826300 | -1.89841800 | 0.37934400  | C                   | -2.51009300 | -1.71970500 0.56903500  |
| H                               | -2.87947000 | -2.68565100 | -0.12760700 | H                   | -3.04778100 | -2.55353000 0.10234500  |
| H                               | -1.32918500 | -2.31277600 | 0.63121900  | H                   | -1.61881100 | -2.13250900 1.05079700  |
| H                               | -2.83035000 | -1.66632000 | 1.31211500  | H                   | -3.15843500 | -1.30237800 1.34509200  |
| Si                              | -1.19808200 | 0.71427400  | 0.32847400  | Si                  | -1.17769100 | 0.75919400 0.28146400   |
| C                               | 3.24115000  | 1.96719700  | -0.13054900 | C                   | 3.27270200  | 1.88847400 -0.05191300  |
| O                               | 2.06040400  | 2.23658200  | -0.06156700 | O                   | 2.12921900  | 2.23369300 -0.07065200  |

| TS4_comp' - 4             |             |             |             |                     |             |                         |
|---------------------------|-------------|-------------|-------------|---------------------|-------------|-------------------------|
| B3LYP-D3(BJ)/6-311+G(d,p) |             |             |             | M06-2X/6-311+G(d,p) |             |                         |
| C                         | 2.58305100  | -1.58367600 | -0.99747900 | C                   | 2.42246900  | -1.78333600 -0.85645300 |
| C                         | 0.93978700  | -0.83673600 | 1.60793900  | C                   | 0.96070100  | -0.68714500 1.71516200  |
| C                         | 2.10754700  | -2.39787100 | -0.01200600 | C                   | 1.97195400  | -2.46031900 0.23178500  |
| C                         | 1.58609800  | -1.97478300 | 1.28233300  | C                   | 1.55907500  | -1.87150100 1.50516500  |
| H                         | 3.02569300  | -2.04003600 | -1.88072700 | H                   | 2.77906000  | -2.35874900 -1.70832500 |
| H                         | 0.68910800  | -0.61408900 | 2.63994300  | H                   | 0.76399400  | -0.33013600 2.72170400  |
| H                         | 2.24608700  | -3.46569700 | -0.14589600 | H                   | 2.03743700  | -3.54239800 0.20200300  |
| H                         | 1.76400100  | -2.65757000 | 2.10957500  | H                   | 1.77358000  | -2.45466000 2.39634800  |
| N                         | 2.63145000  | -0.19332700 | -0.93818500 | N                   | 2.55523100  | -0.40100100 -0.96270800 |
| N                         | 0.56663000  | 0.17779900  | 0.64019200  | N                   | 0.57185300  | 0.20696600 0.64852900   |
| B                         | 1.64285800  | 0.29541100  | -0.22331900 | B                   | 1.62437100  | 0.20152700 -0.25816200  |
| C                         | -2.11229100 | -0.61672600 | -0.48868900 | C                   | -2.05792300 | -0.57123800 -0.56177700 |
| C                         | -1.81524300 | 1.09226700  | 2.11274200  | C                   | -1.83329300 | 1.03264200 2.10020700   |
| H                         | -1.22913700 | 1.86639700  | 2.61561900  | H                   | -1.21387800 | 1.72519000 2.67601600   |
| H                         | -2.84596600 | 1.44942000  | 2.03650300  | H                   | -2.83197500 | 1.46860100 2.01672300   |
| H                         | -1.82095600 | 0.20488100  | 2.75015400  | H                   | -1.92201400 | 0.10387300 2.66890300   |
| C                         | -0.99469600 | 2.29273900  | -0.61978200 | C                   | -0.98696400 | 2.33860400 -0.57558900  |
| H                         | -0.44137800 | 3.07091300  | -0.08791400 | H                   | -0.47914400 | 3.11496800 0.00256500   |
| H                         | -0.49501000 | 2.11492300  | -1.57599500 | H                   | -0.44122300 | 2.19925300 -1.51317300  |
| H                         | -1.99170000 | 2.68456300  | -0.83721700 | H                   | -1.98289400 | 2.71055000 -0.82966700  |
| C                         | -3.51309100 | -0.07118600 | -0.82737800 | C                   | -3.52958100 | -0.15065500 -0.68827900 |
| H                         | -3.46635000 | 0.78720900  | -1.50349100 | H                   | -3.64061300 | 0.80916200 -1.20248900  |
| H                         | -4.10686700 | -0.84686400 | -1.32559100 | H                   | -4.08263700 | -0.89799000 -1.26905600 |
| H                         | -4.06341800 | 0.23302200  | 0.06845900  | H                   | -4.01434300 | -0.07185000 0.28948200  |
| C                         | -1.38700200 | -1.01072300 | -1.78886700 | C                   | -1.44369500 | -0.72160800 -1.96164700 |
| H                         | -1.26701900 | -0.15929400 | -2.46550200 | H                   | -1.52520300 | 0.20066200 -2.54449500  |
| H                         | -0.39705300 | -1.42770900 | -1.58799700 | H                   | -0.38711000 | -1.00596400 -1.91010900 |
| H                         | -1.96506400 | -1.77333500 | -2.32447200 | H                   | -1.96785800 | -1.50848700 -2.51645300 |
| C                         | -2.25706500 | -1.86309200 | 0.40518200  | C                   | -1.97238300 | -1.92195600 0.16413800  |
| H                         | -2.82558100 | -2.63763100 | -0.12395200 | H                   | -2.55193900 | -2.67386500 -0.38461800 |
| H                         | -1.28581900 | -2.28637100 | 0.66980600  | H                   | -0.93983000 | -2.27560200 0.22749700  |
| H                         | -2.79433500 | -1.63991100 | 1.33153700  | H                   | -2.37997600 | -1.86990500 1.17848200  |
| Si                        | -1.10978000 | 0.72909200  | 0.41249600  | Si                  | -1.09798600 | 0.74402200 0.40338400   |
| C                         | 2.48521600  | 2.48123700  | -0.37708600 | C                   | 2.42048900  | 2.27682100 -0.63049600  |
| O                         | 3.07704800  | 3.32679800  | -0.82949200 | O                   | 3.00200400  | 3.13556800 -1.05315700  |



| TS <sub>4</sub> – 4 (2+1) |             |             |             |                     |             |                         |
|---------------------------|-------------|-------------|-------------|---------------------|-------------|-------------------------|
| B3LYP-D3(BJ)/6-311+G(d,p) |             |             |             | M06-2X/6-311+G(d,p) |             |                         |
| C                         | 3.66975800  | -0.32113300 | -0.26074600 | C                   | 3.68290400  | -0.31374600 -0.04103800 |
| C                         | 0.81104800  | -1.74568900 | 0.24963100  | C                   | 0.80192400  | -1.74719000 0.19487900  |
| C                         | 3.35233400  | -1.62915800 | -0.20999700 | C                   | 3.37392900  | -1.61777600 0.02832000  |
| C                         | 2.03618600  | -2.25063300 | -0.00812600 | C                   | 2.04114100  | -2.24728300 0.04439500  |
| H                         | 4.69067200  | 0.00003200  | -0.43044200 | H                   | 4.71700500  | 0.00846700 -0.07410100  |
| H                         | 0.00896800  | -2.46936700 | 0.34396300  | H                   | -0.01557600 | -2.46235800 0.16103100  |
| H                         | 4.17025200  | -2.32994200 | -0.34744000 | H                   | 4.20722500  | -2.31278700 0.04744900  |
| H                         | 2.04814600  | -3.33279900 | -0.07990100 | H                   | 2.06065200  | -3.32354700 -0.08567500 |
| N                         | 2.70767600  | 0.68305500  | -0.11403600 | N                   | 2.71145700  | 0.69523400 -0.09653700  |
| N                         | 0.38278500  | -0.40468900 | 0.42351800  | N                   | 0.37882400  | -0.40742000 0.39003700  |
| B                         | 1.36421800  | 0.59372100  | 0.14670400  | B                   | 1.36532700  | 0.57739100 0.08011100   |
| C                         | -2.28435500 | 0.07313400  | -0.88755000 | C                   | -2.28833100 | 0.07389500 -0.89923200  |
| C                         | -2.02078500 | -1.33691600 | 1.88749200  | C                   | -2.00598000 | -1.33536300 1.85954900  |
| H                         | -1.39405400 | -1.45169100 | 2.77606500  | H                   | -1.34432800 | -1.48122400 2.71714100  |
| H                         | -3.02286300 | -1.05246300 | 2.22065600  | H                   | -2.98460200 | -1.03042500 2.23955100  |
| H                         | -2.10256800 | -2.31352500 | 1.40524900  | H                   | -2.13195700 | -2.30071400 1.36449600  |
| C                         | -1.33704000 | 1.65046100  | 1.63039100  | C                   | -1.31587800 | 1.64961500 1.59246600   |
| H                         | -0.70249100 | 1.62420100  | 2.52062900  | H                   | -0.66681700 | 1.62216200 2.47170000   |
| H                         | -0.99266900 | 2.47017200  | 0.99645200  | H                   | -0.97962300 | 2.46723900 0.95044400   |
| H                         | -2.35276800 | 1.89185000  | 1.95586500  | H                   | -2.32474200 | 1.89588400 1.93406400   |
| C                         | -3.75053300 | 0.45513700  | -0.61067100 | C                   | -3.75488500 | 0.42052200 -0.60383800  |
| H                         | -3.83332800 | 1.43492700  | -0.13135300 | H                   | -3.85132600 | 1.39061600 -0.10691200  |
| H                         | -4.31348900 | 0.50275500  | -1.55056200 | H                   | -4.32526500 | 0.47252000 -1.53853700  |
| H                         | -4.24902900 | -0.27786000 | 0.03068000  | H                   | -4.23058800 | -0.33503000 0.02889900  |
| C                         | -1.64453300 | 1.13072300  | -1.80593500 | C                   | -1.68052600 | 1.15218200 -1.80799900  |
| H                         | -1.65841200 | 2.12832100  | -1.35836300 | H                   | -1.70639700 | 2.14378200 -1.34640200  |
| H                         | -0.60709000 | 0.88164800  | -2.04679300 | H                   | -0.64232500 | 0.92002300 -2.06642700  |
| H                         | -2.19298100 | 1.19006300  | -2.75356500 | H                   | -2.24280900 | 1.21323400 -2.74704500  |
| C                         | -2.23698500 | -1.29411500 | -1.59484200 | C                   | -2.21923300 | -1.27742900 -1.62575300 |
| H                         | -2.77886100 | -1.24515300 | -2.54704200 | H                   | -2.78058500 | -1.22645800 -2.56612800 |
| H                         | -1.21104900 | -1.59959500 | -1.81831400 | H                   | -1.18841700 | -1.54866200 -1.87347700 |
| H                         | -2.70362400 | -2.08145400 | -0.99574700 | H                   | -2.65416300 | -2.08568300 -1.02995300 |
| Si                        | -1.32077100 | -0.01077600 | 0.75562100  | Si                  | -1.31438700 | -0.01275100 0.72616600  |
| C                         | 1.61839700  | 2.06004400  | -0.13717300 | C                   | 1.53736600  | 2.04195400 -0.35264800  |
| O                         | 1.78118600  | 3.19219900  | -0.33697800 | O                   | 1.70233500  | 3.13660800 -0.65165400  |

| 5_Comp'                   |             |             |             |                     |             |                         |
|---------------------------|-------------|-------------|-------------|---------------------|-------------|-------------------------|
| B3LYP-D3(BJ)/6-311+G(d,p) |             |             |             | M06-2X/6-311+G(d,p) |             |                         |
| C                         | -2.23111000 | 2.10853400  | -0.97404600 | C                   | 2.17437800  | -2.04386100 -1.01458100 |
| C                         | -0.69868200 | 1.00435900  | 1.57458900  | C                   | 0.76285400  | -1.02676200 1.62404900  |
| C                         | -1.59827200 | 2.79589000  | 0.02068300  | C                   | 1.61048600  | -2.75982000 -0.00568500 |
| C                         | -1.14030200 | 2.24766900  | 1.29279900  | C                   | 1.23204000  | -2.24751100 1.31206600  |
| H                         | -2.59367200 | 2.66065400  | -1.83928000 | H                   | 2.47218500  | -2.57166500 -1.91845500 |
| H                         | -0.47839800 | 0.70402800  | 2.59344100  | H                   | 0.57699000  | -0.73790000 2.65366600  |
| H                         | -1.54184300 | 3.87431400  | -0.08360700 | H                   | 1.53648500  | -3.83281300 -0.14296200 |
| H                         | -1.18250700 | 2.92528500  | 2.14214400  | H                   | 1.35257400  | -2.93204300 2.14685900  |
| N                         | -2.53432100 | 0.74535600  | -0.94468400 | N                   | 2.48814100  | -0.67936500 -0.97523700 |
| N                         | -0.52314900 | -0.02628500 | 0.56449400  | N                   | 0.50930800  | -0.00486900 0.63153200  |
| B                         | -1.60122100 | 0.10487400  | -0.28451000 | B                   | 1.55076200  | -0.11496900 -0.25983200 |
| C                         | 2.27060000  | 0.31602400  | -0.50480700 | C                   | -2.18563800 | -0.28333100 -0.62935700 |
| C                         | 1.61814000  | -1.47263000 | 1.97670200  | C                   | -1.75401200 | 1.05394500 2.15358300   |
| H                         | 0.88973600  | -2.15531300 | 2.42278200  | H                   | -1.03493200 | 1.58166700 2.78551700   |
| H                         | 2.56596800  | -2.00975700 | 1.88209400  | H                   | -2.66618000 | 1.65460300 2.11397100   |
| H                         | 1.77712900  | -0.64540600 | 2.67254800  | H                   | -2.00081600 | 0.10571100 -2.63722200  |
| C                         | 0.62018400  | -2.31522700 | -0.83056500 | C                   | -0.68953200 | 2.42941300 -0.41522500  |
| H                         | -0.07743800 | -3.00188600 | -0.34624000 | H                   | -0.09534600 | 3.07575600 0.23518400   |
| H                         | 0.16417800  | -1.98139100 | -1.76647300 | H                   | -0.11894100 | 2.27098800 -1.33479700  |
| H                         | 1.52553700  | -2.87397300 | -1.08135900 | H                   | -1.60936000 | 2.95826700 -0.67795400  |
| C                         | 3.53784300  | -0.46658600 | -0.90036800 | C                   | -3.59283000 | 0.32963800 -0.68385200  |
| H                         | 3.32504600  | -1.24412800 | -1.63934100 | H                   | -3.58402300 | 1.34468300 -1.09349300  |
| H                         | 4.27467300  | 0.21334000  | -1.34440400 | H                   | -4.23991000 | -0.27702700 -1.32788600 |
| H                         | 4.01409000  | -0.94151500 | -0.03683800 | H                   | -4.05692000 | 0.36577300 0.30631900   |
| C                         | 1.64061500  | 0.94223700  | -1.76295000 | C                   | -1.60749000 | -0.37255800 -2.04957700 |
| H                         | 1.35332600  | 0.18437100  | -2.49798300 | H                   | -1.57823200 | 0.60460800 -2.54028800  |
| H                         | 0.75351800  | 1.53214400  | -1.51916100 | H                   | -0.59356100 | -0.78789300 -2.04785100 |
| H                         | 2.36039500  | 1.61157100  | -2.24926500 | H                   | -2.22935000 | -1.03285100 -2.66510300 |
| C                         | 2.65543000  | 1.43763000  | 0.47857000  | C                   | -2.26504000 | -1.69771700 -0.03635300 |
| H                         | 3.36628500  | 2.12382400  | 0.00221100  | H                   | -2.94515900 | -2.31293700 -0.63733900 |
| H                         | 1.78570000  | 2.02184800  | 0.78657600  | H                   | -1.28617800 | -2.18491600 -0.03410700 |
| H                         | 3.13615600  | 1.04311100  | 1.37846800  | H                   | -2.64694500 | -1.69307000 0.98931800  |
| Si                        | 1.02186900  | -0.87548600 | 0.30100400  | Si                  | -1.06066100 | 0.80522300 0.43360200   |
| C                         | -3.10692900 | -2.44551000 | -0.76475200 | C                   | 2.92607300  | 2.53340700 -0.84634500  |
| C                         | -3.18870300 | -2.17231300 | 0.53554200  | C                   | 3.16628500  | 2.24331200 0.42805300   |
| H                         | -2.71913000 | -2.80254300 | 1.28367700  | H                   | 2.85474300  | 2.90222400 1.23177500   |
| H                         | -2.57128300 | -3.31519800 | -1.13064800 | H                   | 2.41255700  | 3.44554700 -1.13201600  |
| H                         | -3.73261200 | -1.30586000 | 0.89540800  | H                   | 3.69112900  | 1.33449300 0.70483900   |
| H                         | -3.56552400 | -1.79904300 | -1.50330800 | H                   | 3.23703800  | 1.86121800 -1.63840400  |

| 5_Comp                    |             |             |             |                     |             |                         |
|---------------------------|-------------|-------------|-------------|---------------------|-------------|-------------------------|
| B3LYP-D3(BJ)/6-311+G(d,p) |             |             |             | M06-2X/6-311+G(d,p) |             |                         |
| C                         | 2.26659100  | -1.67011000 | -0.98550000 | C                   | 2.21834200  | -1.68690600 -0.98909700 |
| C                         | 1.04626900  | -0.38063400 | 1.57999900  | C                   | 1.04321400  | -0.42527600 1.60506300  |
| C                         | 2.07372000  | -2.23718700 | 0.26613900  | C                   | 1.96010100  | -2.28400200 0.21960800  |
| C                         | 1.74376400  | -1.55547300 | 1.47037400  | C                   | 1.67139000  | -1.61948900 1.46174500  |
| H                         | 2.59008900  | -2.33897700 | -1.78378300 | H                   | 2.50718500  | -2.33616800 -1.81452500 |
| H                         | 0.82141200  | -0.00759000 | 2.57976300  | H                   | 0.87192600  | -0.03796500 2.61013100  |
| H                         | 2.33988900  | -3.28609400 | 0.36194100  | H                   | 2.12014300  | -3.35668800 0.27169900  |
| H                         | 2.00804300  | -2.04198300 | 2.40478200  | H                   | 1.93957800  | -2.13930800 2.37648800  |
| N                         | 2.32943800  | -0.35577500 | -1.23609800 | N                   | 2.36760700  | -0.35498800 -1.18851200 |
| N                         | 0.54914600  | 0.33718000  | 0.49694100  | N                   | 0.56868200  | 0.34752800 0.52997600   |
| B                         | 1.66831800  | 0.57705400  | -0.45887800 | B                   | 1.68630400  | 0.54580800 -0.41757600  |
| C                         | -2.10863200 | -0.67441200 | -0.47125900 | C                   | -2.08147400 | -0.63808800 -0.50233200 |
| C                         | -1.82874700 | 1.12844500  | 2.05065600  | C                   | -1.82178500 | 1.05738800 2.07665500   |
| H                         | -1.24304000 | 1.90983900  | 2.54383100  | H                   | -1.22440200 | 1.80030100 2.61224300   |
| H                         | -2.86221900 | 1.47976900  | 1.98650000  | H                   | -2.84556200 | 1.43536800 2.01464300   |
| H                         | -1.82138000 | 0.24520400  | 2.69420000  | H                   | -1.84163300 | 0.14416600 2.67680600   |
| C                         | -1.28086600 | 2.29679400  | -0.75285900 | C                   | -1.25532100 | 2.31926300 -0.68122700  |
| H                         | -0.89849600 | 3.18519500  | -0.24363100 | H                   | -0.92040100 | 3.20116500 -0.12905300  |
| H                         | -0.73083700 | 2.18010900  | -1.68955400 | H                   | -0.66718300 | 2.24447700 -1.59981900  |
| H                         | -2.32741400 | 2.48846600  | -1.00530600 | H                   | -2.29538300 | 2.49154500 -0.97076400  |
| C                         | -3.61316700 | -0.34916900 | -0.51329500 | C                   | -3.58546200 | -0.32969100 -0.50560400 |
| H                         | -3.82253600 | 0.55886000  | -1.08687800 | H                   | -3.81330900 | 0.61298100 -1.01281400  |
| H                         | -4.16314300 | -1.16910900 | -0.99147600 | H                   | -4.12901700 | -1.12275600 -1.03301400 |
| H                         | -4.03067400 | -0.21842500 | 0.48940900  | H                   | -3.98930500 | -0.27551100 0.50986300  |
| C                         | -1.59218600 | -0.89273800 | -1.90527000 | C                   | -1.58101100 | -0.77023800 -1.94792500 |
| H                         | -1.76940300 | -0.01899400 | -2.53930100 | H                   | -1.78934600 | 0.13086800 -2.53294200  |
| H                         | -0.52109800 | -1.10924000 | -1.91808900 | H                   | -0.50309600 | -0.95981100 -1.98120200 |
| H                         | -2.10852800 | -1.74300400 | -2.36782200 | H                   | -2.08185200 | -1.60952100 -2.44535400 |
| C                         | -1.88993200 | -1.96374600 | 0.34113900  | C                   | -1.84035900 | -1.96509000 0.23076400  |
| H                         | -2.44889300 | -2.79239400 | -0.11149600 | H                   | -2.40988900 | -2.76754900 -0.25402700 |
| H                         | -0.83612300 | -2.24742100 | 0.36654900  | H                   | -0.78371900 | -2.24278500 0.21048200  |
| H                         | -2.23931400 | -1.86154500 | 1.37321800  | H                   | -2.16263600 | -1.91991700 1.27602200  |
| Si                        | -1.14748800 | 0.76700000  | 0.33295100  | Si                  | -1.12488400 | 0.75852800 0.35814500   |
| C                         | 2.12146100  | 2.20496700  | -0.66486400 | C                   | 2.13784200  | 2.23594500 -0.69488300  |
| C                         | 3.17736000  | 1.61952100  | 0.06644700  | C                   | 3.13379900  | 1.65090100 0.07573700   |
| H                         | 3.17093200  | 1.62453500  | 1.14921600  | H                   | 3.07641400  | 1.67115700 1.15831100   |
| H                         | 1.42993100  | 2.86073400  | -0.15479400 | H                   | 1.37337700  | 2.83769400 -0.22447900  |
| H                         | 4.06640400  | 1.25088500  | -0.42017400 | H                   | 4.04128700  | 1.27094000 -0.36722900  |
| H                         | 2.27575100  | 2.40051500  | -1.72018600 | H                   | 2.29400000  | 2.36281200 -1.75888700  |

| 5                         |             |             |             |                     |             |             |             |
|---------------------------|-------------|-------------|-------------|---------------------|-------------|-------------|-------------|
| B3LYP-D3(BJ)/6-311+G(d,p) |             |             |             | M06-2X/6-311+G(d,p) |             |             |             |
| C                         | -3.54119700 | -0.46036000 | 0.51033300  | C                   | -3.52184400 | -0.45950700 | 0.52331400  |
| C                         | -0.80384300 | -1.68304800 | -0.57736900 | C                   | -0.80419000 | -1.67949200 | -0.60305400 |
| C                         | -3.19302200 | -1.75164200 | 0.38698600  | C                   | -3.17232400 | -1.74668900 | 0.41205300  |
| C                         | -1.95134100 | -2.27374400 | -0.19091300 | C                   | -1.94617200 | -2.26831600 | -0.21016000 |
| H                         | -4.49876700 | -0.17618400 | 0.93395900  | H                   | -4.46371300 | -0.16973100 | 0.97801200  |
| H                         | -0.05112900 | -2.34447100 | -0.99005000 | H                   | -0.06257800 | -2.33762300 | -1.04573000 |
| H                         | -3.90972500 | -2.49151600 | 0.72207600  | H                   | -3.86962800 | -2.48553300 | 0.78621500  |
| H                         | -1.95345500 | -3.34774700 | -0.34877100 | H                   | -1.96197600 | -3.33751500 | -0.39381400 |
| N                         | -2.71708000 | 0.58289000  | 0.11860100  | N                   | -2.71689800 | 0.57963400  | 0.08198600  |
| N                         | -0.39276900 | -0.31636000 | -0.55263000 | N                   | -0.38561000 | -0.31919900 | -0.55292700 |
| B                         | -1.35166900 | 0.70060200  | -0.27709900 | B                   | -1.34758400 | 0.69795600  | -0.28801200 |
| C                         | 2.18490000  | -0.04746500 | 0.96134500  | C                   | 2.17175400  | -0.05081500 | 0.96112700  |
| C                         | 2.09842900  | -1.20576500 | -1.92703100 | C                   | 2.10496700  | -1.19313200 | -1.91970900 |
| H                         | 1.51770100  | -1.26917200 | -2.85165200 | H                   | 1.49808300  | -1.29324700 | -2.82364300 |
| H                         | 3.11047900  | -0.88781300 | -2.19358300 | H                   | 3.09487800  | -0.84191700 | -2.22343800 |
| H                         | 2.17305200  | -2.21036300 | -1.50551300 | H                   | 2.22964100  | -2.18653400 | -1.48350900 |
| C                         | 1.54571400  | 1.75887400  | -1.49790200 | C                   | 1.53417700  | 1.76506200  | -1.47735600 |
| H                         | 0.96603800  | 1.84942700  | -2.42013800 | H                   | 0.94852200  | 1.85631300  | -2.39567000 |
| H                         | 1.23883200  | 2.56204300  | -0.82736300 | H                   | 1.22408900  | 2.56181800  | -0.79986400 |
| H                         | 2.59837000  | 1.91718400  | -1.75019800 | H                   | 2.58420600  | 1.93118700  | -1.73435200 |
| C                         | 3.68746800  | 0.25761000  | 0.81858300  | C                   | 3.68119900  | 0.19007500  | 0.81929100  |
| H                         | 3.86387800  | 1.26261700  | 0.42392800  | H                   | 3.89744800  | 1.17895200  | 0.40306600  |
| H                         | 4.18165200  | 0.19854000  | 1.79608400  | H                   | 4.16716400  | 0.13305100  | 1.80051300  |
| H                         | 4.18698700  | -0.45671200 | 0.15740900  | H                   | 4.15166600  | -0.55981800 | 0.17603700  |
| C                         | 1.54537100  | 0.97617900  | 1.91681500  | C                   | 1.57085700  | 1.00800400  | 1.89635900  |
| H                         | 1.66225700  | 2.00200100  | 1.55580200  | H                   | 1.73915300  | 2.02345200  | 1.52506100  |
| H                         | 0.47759200  | 0.78491900  | 2.05449200  | H                   | 0.49310800  | 0.86412700  | 2.02379900  |
| H                         | 2.01978500  | 0.91985900  | 2.90411500  | H                   | 2.03227200  | 0.93900200  | 2.88861500  |
| C                         | 2.00243500  | -1.45843100 | 1.55136300  | C                   | 1.92788000  | -1.44075700 | 1.56739500  |
| H                         | 2.46607100  | -1.51506100 | 2.54398900  | H                   | 2.39169900  | -1.50406700 | 2.55908000  |
| H                         | 0.94634000  | -1.71737400 | 1.66364200  | H                   | 0.85974100  | -1.64696800 | 1.68426200  |
| H                         | 2.47281200  | -2.22496100 | 0.92877300  | H                   | 2.36144900  | -2.23574100 | 0.95306800  |
| Si                        | 1.33836100  | 0.04956500  | -0.74711300 | Si                  | 1.33830600  | 0.05242300  | -0.74035500 |
| C                         | -1.44126800 | 2.29503200  | -0.21562100 | C                   | -1.42684400 | 2.29251900  | -0.20926900 |
| H                         | -1.35697700 | 2.83726600  | -1.15871800 | H                   | -1.33579500 | 2.84393400  | -1.14545400 |
| C                         | -2.91293600 | 2.03559400  | 0.24216800  | C                   | -2.89728500 | 2.02816500  | 0.23582400  |
| H                         | -3.68336900 | 2.43178600  | -0.42833200 | H                   | -3.66214800 | 2.44400200  | -0.42625700 |
| H                         | -3.13211100 | 2.35401500  | 1.26780400  | H                   | -3.11183900 | 2.32213200  | 1.26820000  |
| H                         | -0.83033600 | 2.80208900  | 0.53297400  | H                   | -0.81932000 | 2.78327600  | 0.55252800  |

| 6                         |             |             |             |                     |             |                         |
|---------------------------|-------------|-------------|-------------|---------------------|-------------|-------------------------|
| B3LYP-D3(BJ)/6-311+G(d,p) |             |             |             | M06-2X/6-311+G(d,p) |             |                         |
| C                         | 3.03108100  | -0.64497100 | -0.93258700 | C                   | -3.02845000 | -0.56386200 0.92153100  |
| C                         | 1.03655500  | -1.41145900 | 1.29453400  | C                   | -1.05010100 | -1.43357900 -1.27261800 |
| C                         | 2.70890300  | -1.87640900 | -0.51100100 | C                   | -2.71054600 | -1.81089200 0.55849500  |
| C                         | 1.96082900  | -2.17889500 | 0.70091800  | C                   | -1.98307500 | -2.16633200 -0.65760800 |
| H                         | 3.66345100  | -0.52394400 | -1.80657000 | H                   | -3.64486200 | -0.40183700 1.80028100  |
| H                         | 0.59927000  | -1.76986700 | 2.22163200  | H                   | -0.61991900 | -1.82138700 -2.19227600 |
| H                         | 3.09975300  | -2.71205300 | -1.08075000 | H                   | -3.08653200 | -2.61841200 1.17572200  |
| H                         | 2.19498700  | -3.11756400 | 1.19470400  | H                   | -2.24118500 | -3.11205700 -1.12352000 |
| N                         | 2.64269300  | 0.55608600  | -0.32683500 | N                   | -2.64687200 | 0.60602900 0.25441400   |
| N                         | 0.52927400  | -0.15061000 | 0.85911600  | N                   | -0.52722700 | -0.16969300 -0.87017000 |
| B                         | 1.45035700  | 0.86576000  | 0.39614800  | B                   | -1.42867000 | 0.87458600 -0.44103800  |
| C                         | -1.72392400 | -0.28440000 | -1.09996300 | C                   | 1.68982600  | -0.27096600 1.10607000  |
| C                         | -2.02020300 | -1.32636700 | 1.81515100  | C                   | 1.99873900  | -1.41475100 -1.75808400 |
| H                         | -1.73738300 | -1.19310500 | 2.86348300  | H                   | 1.74731900  | -1.29495200 -2.81565400 |
| H                         | -3.10954100 | -1.24677700 | 1.75856500  | H                   | 3.08814800  | -1.37242300 -1.67462300 |
| H                         | -1.74333200 | -2.33921900 | 1.51636900  | H                   | 1.67579000  | -2.40902700 -1.44311500 |
| C                         | -1.87041500 | 1.66889000  | 1.31219400  | C                   | 1.90452900  | 1.59504000 -1.35164000  |
| H                         | -1.51716400 | 1.89014000  | 2.32272600  | H                   | 1.52251600  | 1.82065600 -2.35018600  |
| H                         | -1.57249000 | 2.49087300  | 0.66100600  | H                   | 1.66618500  | 2.43436500 -0.69646800  |
| H                         | -2.96402500 | 1.64080100  | 1.34293700  | H                   | 2.99378100  | 1.51923300 -1.42332600  |
| C                         | -3.25009400 | -0.15991200 | -1.26330100 | C                   | 3.20023500  | -0.07702100 1.30153900  |
| H                         | -3.60981100 | 0.83752900  | -0.99411500 | H                   | 3.51524900  | 0.93789900 1.04092700   |
| H                         | -3.53487900 | -0.33936100 | -2.30742600 | H                   | 3.46893300  | -0.24604700 2.35114700  |
| H                         | -3.78759700 | -0.88947100 | -0.65016800 | H                   | 3.78365200  | -0.77976800 0.69833800  |
| C                         | -1.03280300 | 0.76088700  | -1.99436100 | C                   | 0.93455000  | 0.75430100 1.96472100   |
| H                         | -1.30206700 | 1.78408000  | -1.71843700 | H                   | 1.14555400  | 1.78441000 1.66131000   |
| H                         | 0.05578200  | 0.67455300  | -1.94562700 | H                   | -0.14816500 | 0.59902200 1.91200000   |
| H                         | -1.32606000 | 0.61221300  | -3.04105200 | H                   | 1.23001000  | 0.64926200 3.01572500   |
| C                         | -1.27333300 | -1.68942400 | -1.54110300 | C                   | 1.28750400  | -1.68256900 1.55790400  |
| H                         | -1.52270200 | -1.85046500 | -2.59743100 | H                   | 1.49544600  | -1.80777600 2.62752500  |
| H                         | -0.19408400 | -1.81894600 | -1.42949100 | H                   | 0.21895300  | -1.86227500 1.40091400  |
| H                         | -1.76923000 | -2.47569400 | -0.96491200 | H                   | 1.84665500  | -2.45463800 1.02129700  |
| Si                        | -1.23898300 | -0.00367200 | 0.72725200  | Si                  | 1.23656900  | -0.04404000 -0.72520500 |
| C                         | 1.17764300  | 2.39279800  | 0.64160100  | C                   | -1.09870800 | 2.39714100 -0.68053600  |
| C                         | 1.41635200  | 3.35834300  | -0.25198800 | C                   | -1.30366200 | 3.34383700 0.23742200   |
| H                         | 1.79674200  | 3.13539300  | -1.24597400 | H                   | -1.69308500 | 3.10155400 1.22389700   |
| H                         | 1.21895400  | 4.40634200  | -0.04643300 | H                   | -1.07043300 | 4.38924000 0.05996500   |
| H                         | 0.75498600  | 2.69324700  | 1.59820200  | H                   | -0.66781700 | 2.70345300 -1.63182900  |
| H                         | 3.23309900  | 1.34108800  | -0.56004800 | H                   | -3.22115600 | 1.40870400 0.46714100   |

| TS5_comp' - 5_comp        |             |             |             |                     |              |              |
|---------------------------|-------------|-------------|-------------|---------------------|--------------|--------------|
| B3LYP-D3(BJ)/6-311+G(d,p) |             |             |             | M06-2X/6-311+G(d,p) |              |              |
| C                         | 2.15196600  | -1.95927600 | -0.98840600 | C                   | 2.106024000  | -1.945334000 |
| C                         | 0.91351300  | -0.73627200 | 1.64307700  | C                   | 0.941006000  | -0.680868000 |
| C                         | 1.67027600  | -2.60286900 | 0.11761700  | C                   | 1.642335000  | -2.568340000 |
| C                         | 1.35979900  | -1.98654900 | 1.39693200  | C                   | 1.384333000  | -1.931728000 |
| H                         | 2.43353300  | -2.56023000 | -1.85178200 | H                   | 2.345588000  | -2.561846000 |
| H                         | 0.81583400  | -0.36751200 | 2.65896400  | H                   | 0.859149000  | -0.288955000 |
| H                         | 1.65215900  | -3.68739400 | 0.08786900  | H                   | 1.589760000  | -3.651274000 |
| H                         | 1.53125000  | -2.60117600 | 2.27758300  | H                   | 1.586236000  | -2.528563000 |
| N                         | 2.42198900  | -0.60251800 | -1.07506200 | N                   | 2.413222000  | -0.598665000 |
| N                         | 0.56588100  | 0.20402700  | 0.59228100  | N                   | 0.572050000  | 0.226970000  |
| B                         | 1.60018900  | 0.11618300  | -0.33456300 | B                   | 1.607005000  | 0.122400000  |
| C                         | -2.13944100 | -0.42616600 | -0.59961700 | C                   | -2.137060000 | -0.451107000 |
| C                         | -1.78232800 | 1.04223600  | 2.13663300  | C                   | -1.748497000 | 1.120304000  |
| H                         | -1.14997000 | 1.71981200  | 2.71735900  | H                   | -1.089922000 | 1.796487000  |
| H                         | -2.78496200 | 1.47636600  | 2.09611500  | H                   | -2.738765000 | 1.580678000  |
| H                         | -1.85129000 | -0.09638300 | 2.67872000  | H                   | -1.835910000 | 0.192577000  |
| C                         | -0.99385900 | 2.45885800  | -0.49016000 | C                   | -0.986001000 | 2.414955000  |
| H                         | -0.47505000 | 3.20236500  | 0.12010700  | H                   | -0.526512000 | 3.208572000  |
| H                         | -0.46859700 | 2.37433500  | -1.44458200 | H                   | -0.402010000 | 2.289827000  |
| H                         | -1.99668300 | 2.84167600  | -0.69779600 | H                   | -1.984601000 | 2.752698000  |
| C                         | -3.57565800 | 0.11325700  | -0.74360300 | C                   | -3.586337000 | 0.049418000  |
| H                         | -3.60522200 | 1.07221600  | -1.26922900 | H                   | -3.659637000 | 1.006427000  |
| H                         | -4.18437600 | -0.59293200 | -1.32101800 | H                   | -4.193231000 | -0.674839000 |
| H                         | -4.06328500 | 0.24395500  | 0.22711000  | H                   | -4.041362000 | 0.166602000  |
| C                         | -1.51924500 | -0.60621100 | -1.99790600 | C                   | -1.564807000 | -0.637628000 |
| H                         | -1.49589700 | 0.33225000  | -2.55963400 | H                   | -1.601375000 | 0.289490000  |
| H                         | -0.49969500 | -0.99531400 | -1.94142400 | H                   | -0.527163000 | -0.986004000 |
| H                         | -2.11157400 | -1.32122000 | -2.58156600 | H                   | -2.149157000 | -1.389284000 |
| C                         | -2.17966300 | -1.79178100 | 0.11090900  | C                   | -2.116935000 | -1.802488000 |
| H                         | -2.79344600 | -2.49376900 | -0.46688600 | H                   | -2.751781000 | -2.519423000 |
| H                         | -1.18241100 | -2.22422500 | 0.20848000  | H                   | -1.106934000 | -2.217060000 |
| H                         | -2.61947400 | -1.72008500 | 1.11001400  | H                   | -2.500574000 | -1.722688000 |
| Si                        | -1.09538900 | 0.81145100  | 0.40536100  | Si                  | -1.086251000 | 0.818535000  |
| C                         | 2.60627100  | 2.45112200  | -0.74468200 | C                   | 2.578825000  | 2.400429000  |
| C                         | 3.36637500  | 1.95136300  | 0.23478200  | C                   | 3.343418000  | 1.894850000  |
| H                         | 3.18520900  | 2.20023700  | 1.27501500  | H                   | 3.169249000  | 2.142760000  |
| H                         | 1.79720600  | 3.14075400  | -0.53815600 | H                   | 1.775245000  | 3.093790000  |
| H                         | 4.18380100  | 1.27385200  | 0.02456600  | H                   | 4.157744000  | 1.216735000  |
| H                         | 2.79707700  | 2.20817200  | -1.78321200 | H                   | 2.763733000  | 2.158890000  |

| TS <sub>5</sub> _comp - 5 |             |             |             |                     |             |                         |
|---------------------------|-------------|-------------|-------------|---------------------|-------------|-------------------------|
| B3LYP-D3(BJ)/6-311+G(d,p) |             |             |             | M06-2X/6-311+G(d,p) |             |                         |
| C                         | 2.75890600  | -1.40817000 | -0.99995200 | C                   | 2.50012900  | -1.48063500 -0.97417300 |
| C                         | 0.81735600  | -0.77861600 | 1.35786400  | C                   | 0.97285000  | -0.50420600 1.56035800  |
| C                         | 2.42323700  | -2.20133700 | 0.06541400  | C                   | 2.30944800  | -2.12432500 0.21161200  |
| C                         | 1.69949700  | -1.81054200 | 1.23831800  | C                   | 1.81433600  | -1.56043000 1.44217600  |
| H                         | 3.34335500  | -1.86209300 | -1.79934400 | H                   | 2.93266700  | -2.05030800 -1.79409700 |
| H                         | 0.30558800  | -0.66542400 | 2.31284300  | H                   | 0.62043600  | -0.23948400 2.55773600  |
| H                         | 2.80280000  | -3.21963000 | 0.05364900  | H                   | 2.63680900  | -3.15894900 0.25844200  |
| H                         | 1.80236900  | -2.44385200 | 2.11370600  | H                   | 2.07127900  | -2.07569500 2.36148700  |
| N                         | 2.59752100  | -0.05696900 | -1.07650300 | N                   | 2.39797800  | -0.13039800 -1.18405500 |
| N                         | 0.47327800  | 0.13563100  | 0.36786800  | N                   | 0.49114000  | 0.27507800 0.50900400   |
| B                         | 1.63060600  | 0.66658100  | -0.38942600 | B                   | 1.54339200  | 0.67727100 -0.45788300  |
| C                         | -2.30163200 | -0.65844000 | -0.38995500 | C                   | -2.10781200 | -0.67969700 -0.55865900 |
| C                         | -1.76765900 | 1.38812000  | 1.90264100  | C                   | -1.91510900 | 0.86060900 2.12517400   |
| H                         | -1.10994500 | 2.18364400  | 2.26460000  | H                   | -1.31422400 | 1.54702000 2.72801000   |
| H                         | -2.77806500 | 1.80009900  | 1.82768100  | H                   | -2.93062700 | 1.26288700 2.07857600   |
| H                         | -1.79108800 | -0.60220800 | 2.66169100  | H                   | -1.96408600 | -0.09733100 2.64881900  |
| C                         | -1.14698900 | 2.15903800  | -1.01889800 | C                   | -1.36599200 | 2.32039100 -0.53480200  |
| H                         | -0.62040900 | 3.03323200  | -0.63054800 | H                   | -1.01745800 | 3.15985900 0.07175700   |
| H                         | -0.66142900 | 1.86215000  | -1.95181400 | H                   | -0.79068300 | 2.31237100 -1.46397300  |
| H                         | -2.16796500 | 2.46802000  | -1.25850600 | H                   | -2.41168500 | 2.50973500 -0.79275200  |
| C                         | -3.73230700 | -0.13141100 | -0.60994400 | C                   | -3.62739400 | -0.47620900 -0.49074400 |
| H                         | -3.76659800 | 0.66294300  | -1.36088300 | H                   | -3.93125500 | 0.49262000 -0.90014800  |
| H                         | -4.38150100 | -0.94168000 | -0.96343900 | H                   | -4.13815200 | -1.25156800 -1.07411600 |
| H                         | -4.17187800 | 0.25759400  | 0.31360700  | H                   | -3.99744900 | -0.54117100 0.53689000  |
| C                         | -1.74132700 | -1.19679900 | -1.71946400 | C                   | -1.64862300 | -0.65614600 -2.02373900 |
| H                         | -1.73181500 | -0.42784000 | -2.49766700 | H                   | -1.93710100 | 0.27284800 -2.52470400  |
| H                         | -0.72020100 | -1.56820600 | -1.60168900 | H                   | -0.56171500 | -0.76673200 -2.10392900 |
| H                         | -2.36184100 | -2.02440900 | -2.08446100 | H                   | -2.10635300 | -1.48560500 -2.57591100 |
| C                         | -2.34397800 | -1.80521800 | 0.63718300  | C                   | -1.74465000 | -2.04108700 0.05190400  |
| H                         | -3.00057900 | -2.60651000 | 0.27602200  | H                   | -2.27548000 | -2.84148400 -0.47769500 |
| H                         | -1.35526300 | -2.23964100 | 0.80109600  | H                   | -0.67160800 | -2.23783100 -0.02661900 |
| H                         | -2.73576000 | -1.47467600 | 1.60387600  | H                   | -2.02553600 | -2.10503000 1.10829000  |
| Si                        | -1.17769100 | 0.75555400  | 0.22932900  | Si                  | -1.21108400 | 0.69608100 0.39167200   |
| C                         | 2.10967600  | 2.22436700  | -0.16604000 | C                   | 2.00919000  | 2.27407900 -0.49883300  |
| C                         | 3.32107200  | 1.53787800  | 0.23557900  | C                   | 3.14407300  | 1.54739100 -0.01527200  |
| H                         | 3.42928700  | 1.18282600  | 1.25422400  | H                   | 3.23998200  | 1.33489700 1.04488600   |
| H                         | 1.54623700  | 2.71331400  | 0.62238400  | H                   | 1.43108900  | 2.84765900 0.21386300   |
| H                         | 4.20373400  | 1.51884300  | -0.38153200 | H                   | 4.02374300  | 1.39477700 -0.61857100  |
| H                         | 2.18491100  | 2.81457000  | -1.07501100 | H                   | 2.08912100  | 2.69385300 -1.49488200  |

| TS5_comp' - 6             |             |             |             |                     |             |                         |
|---------------------------|-------------|-------------|-------------|---------------------|-------------|-------------------------|
| B3LYP-D3(BJ)/6-311+G(d,p) |             |             |             | M06-2X/6-311+G(d,p) |             |                         |
| C                         | 2.76049900  | -1.80321500 | -1.11864400 | C                   | 2.65874300  | -1.72833900 -1.30560300 |
| C                         | 0.82363700  | -1.01930500 | 1.22114900  | C                   | 0.86113000  | -1.03121400 1.15505300  |
| C                         | 2.32915600  | -2.56858700 | -0.06750800 | C                   | 2.19096000  | -2.55180700 -0.33053000 |
| C                         | 1.59833600  | -2.12882600 | 1.08744700  | C                   | 1.56359200  | -2.15889500 0.91364900  |
| H                         | 3.34839300  | -2.29648500 | -1.89114500 | H                   | 3.17383200  | -2.18338000 -2.14880600 |
| H                         | 0.34248500  | -0.85646700 | 2.18400300  | H                   | 0.45839500  | -0.87621200 2.15625500  |
| H                         | 2.63312900  | -3.61156000 | -0.07038200 | H                   | 2.38925300  | -3.61224700 -0.45190800 |
| H                         | 1.63775200  | -2.77478400 | 1.95898800  | H                   | 1.64831800  | -2.85333600 1.74343700  |
| N                         | 2.64556400  | -0.45029600 | -1.23062300 | N                   | 2.67556300  | -0.35360800 -1.27235900 |
| N                         | 0.55863400  | -0.06029600 | 0.23981500  | N                   | 0.58689800  | -0.01987600 0.21721400  |
| B                         | 1.73077900  | 0.33596600  | -0.54191400 | B                   | 1.75827100  | 0.37348400 -0.55007200  |
| C                         | -2.35612400 | -0.56029800 | -0.18999000 | C                   | -2.31248300 | -0.57464700 -0.13626800 |
| C                         | -1.35278000 | 1.64232000  | 1.78586900  | C                   | -1.32709900 | 1.68007000 1.75290500   |
| H                         | -0.60492400 | 2.42222500  | 1.95368400  | H                   | -0.66904100 | 2.54847300 1.84293000   |
| H                         | -2.33619900 | 2.12088300  | 1.77582000  | H                   | -2.35933300 | 2.03928200 1.79365100   |
| H                         | -1.32681200 | 0.96289700  | 2.64173000  | H                   | -1.16666000 | 1.04241700 2.62637500   |
| C                         | -0.91916800 | 1.98770100  | -1.24993300 | C                   | -0.93151200 | 1.95723800 -1.29173600  |
| H                         | -0.24099200 | 2.80899800  | -1.01170400 | H                   | -0.18156300 | 2.73443300 -1.13011900  |
| H                         | -0.57087900 | 1.51979900  | -2.17459500 | H                   | -0.69341200 | 1.44563000 -2.22855500  |
| H                         | -1.90655900 | 2.41457500  | -1.44415900 | H                   | -1.89933500 | 2.44992800 -1.41434200  |
| C                         | -3.70371300 | 0.14167000  | -0.44762200 | C                   | -3.61184900 | 0.09518600 -0.61096900  |
| H                         | -3.66360300 | 0.80089000  | -1.31889100 | H                   | -3.48394000 | 0.58716200 -1.57899100  |
| H                         | -4.48424800 | -0.60452600 | -0.63897400 | H                   | -4.39944800 | -0.65868800 -0.72558900 |
| H                         | -4.02755500 | 0.73668800  | 0.41199600  | H                   | -3.97592900 | 0.84104700 0.10378200   |
| C                         | -1.95130500 | -1.36796000 | -1.43710100 | C                   | -1.82084100 | -1.55309800 -1.21297300 |
| H                         | -1.86175400 | -0.73087700 | -2.32199000 | H                   | -1.59782000 | -1.04052700 -2.15402100 |
| H                         | -0.99445500 | -1.87553500 | -1.29270500 | H                   | -0.91393600 | -2.07572200 -0.89629900 |
| H                         | -2.70918200 | -2.12975200 | -1.65716800 | H                   | -2.59470700 | -2.30213300 -1.41958900 |
| C                         | -2.52052200 | -1.52214100 | 1.00160900  | C                   | -2.60317000 | -1.35031400 1.15748000  |
| H                         | -3.31818700 | -2.24486000 | 0.78976500  | H                   | -3.37762600 | -2.10415900 0.97154400  |
| H                         | -1.60802500 | -2.09054200 | 1.19379100  | H                   | -1.71764100 | -1.87675900 1.52355800  |
| H                         | -2.79496400 | -0.99422300 | 1.91979700  | H                   | -2.96765900 | -0.69330000 1.95302900  |
| Si                        | -1.01426100 | 0.75347000  | 0.16107400  | Si                  | -0.98991000 | 0.75981900 0.14822500   |
| C                         | 2.35762800  | 1.86162000  | -0.46435900 | C                   | 2.40790400  | 1.94027300 -0.33733800  |
| C                         | 2.35185100  | 2.66908700  | 0.63261900  | C                   | 2.28015400  | 2.62647100 0.81234600   |
| H                         | 2.58258800  | 3.72646900  | 0.57042000  | H                   | 2.44349900  | 3.69744900 0.86616100   |
| H                         | 2.60425700  | 2.31689000  | -1.42204100 | H                   | 2.72124200  | 2.45823800 -1.23974800  |
| H                         | 2.11659100  | 2.27919900  | 1.61806300  | H                   | 1.99026700  | 2.12404500 1.73143300   |
| H                         | 3.15511300  | 0.82104500  | -0.43584600 | H                   | 3.09707600  | 0.82947400 -0.31286700  |



| M06-2X/6-311+G(d,p)                                                                 |   |             |             |             |
|-------------------------------------------------------------------------------------|---|-------------|-------------|-------------|
| 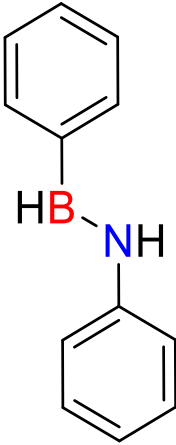   | B | -0.48120100 | -0.68879200 | -0.00000200 |
|                                                                                     | N | 0.53870900  | 0.27751100  | -0.00000100 |
|                                                                                     | C | -1.98998100 | -0.27901600 | -0.00000100 |
|                                                                                     | C | -2.44033800 | 1.04962700  | -0.00001100 |
|                                                                                     | C | -2.96194300 | -1.28863200 | 0.00001000  |
|                                                                                     | C | -3.79412400 | 1.35767900  | -0.00001000 |
|                                                                                     | H | -1.72946300 | 1.87101800  | -0.00002100 |
|                                                                                     | C | -4.32145000 | -0.99218600 | 0.00001100  |
|                                                                                     | H | -2.64197600 | -2.32551000 | 0.00001700  |
|                                                                                     | C | -4.73899400 | 0.33368200  | 0.00000100  |
|                                                                                     | H | -4.11656700 | 2.39234200  | -0.00001800 |
|                                                                                     | H | -5.05273100 | -1.79200300 | 0.00002000  |
|                                                                                     | H | -5.79639900 | 0.57170300  | 0.00000200  |
|                                                                                     | C | 1.93988500  | 0.12116300  | 0.00000000  |
|                                                                                     | C | 2.55014100  | -1.13570100 | -0.00001100 |
|                                                                                     | C | 2.74529800  | 1.26281800  | 0.00001000  |
|                                                                                     | C | 3.93515300  | -1.23502000 | -0.00000900 |
|                                                                                     | H | 1.94410900  | -2.03100900 | -0.00002000 |
|                                                                                     | C | 4.12992100  | 1.15426800  | 0.00001100  |
|                                                                                     | H | 2.27920100  | 2.24319400  | 0.00001800  |
|                                                                                     | C | 4.73594300  | -0.09663900 | 0.00000200  |
|                                                                                     | H | 4.39240700  | -2.21757000 | -0.00001700 |
|                                                                                     | H | 4.73449900  | 2.05350700  | 0.00002000  |
|                                                                                     | H | 5.81509000  | -0.18442700 | 0.00000300  |
|                                                                                     | H | 0.26678500  | 1.25187600  | 0.00000100  |
|                                                                                     | H | -0.19696400 | -1.84400000 | 0.00000000  |
|  | B | -0.56639100 | 0.00007400  | 0.00008500  |
|                                                                                     | N | 0.67820300  | 0.00005700  | 0.00005800  |
|                                                                                     | C | -2.09100800 | 0.00003100  | 0.00003400  |
|                                                                                     | C | -2.80493400 | 1.20636000  | -0.00013500 |
|                                                                                     | C | -2.80486700 | -1.20633700 | 0.00016300  |
|                                                                                     | C | -4.19411400 | 1.20551800  | -0.00017700 |
|                                                                                     | H | -2.26898400 | 2.14858100  | -0.00023700 |
|                                                                                     | C | -4.19404700 | -1.20557100 | 0.00012200  |
|                                                                                     | H | -2.26886500 | -2.14852800 | 0.00029800  |
|                                                                                     | C | -4.88933100 | -0.00004600 | -0.00004800 |
|                                                                                     | H | -4.73474600 | 2.14436700  | -0.00031000 |
|                                                                                     | H | -4.73462700 | -2.14445000 | 0.00022400  |
|                                                                                     | H | -5.97299200 | -0.00007600 | -0.00008000 |
|                                                                                     | C | 2.04880800  | 0.00002500  | 0.00002300  |
|                                                                                     | C | 2.75798500  | 1.20739000  | 0.00015600  |
|                                                                                     | C | 2.75792800  | -1.20737400 | -0.00014300 |
|                                                                                     | C | 4.14617800  | 1.20187600  | 0.00012200  |
|                                                                                     | H | 2.20321800  | 2.13758200  | 0.00028700  |
|                                                                                     | C | 4.14612200  | -1.20192500 | -0.00017600 |
|                                                                                     | H | 2.20311700  | -2.13753900 | -0.00024700 |
|                                                                                     | C | 4.84824900  | -0.00004100 | -0.00004400 |
|                                                                                     | H | 4.68271200  | 2.14347300  | 0.00022800  |
|                                                                                     | H | 4.68261100  | -2.14354800 | -0.00030700 |
|                                                                                     | H | 5.93126400  | -0.00006700 | -0.00007000 |

| M06-2X/6-311+G(d,p)                                                                |    |             |             |             |
|------------------------------------------------------------------------------------|----|-------------|-------------|-------------|
| 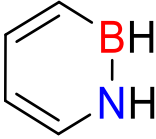  | N  | -1.26767000 | 0.50424300  | -0.00008100 |
|                                                                                    | B  | -0.20647400 | 1.46774800  | 0.00000400  |
|                                                                                    | C  | 1.18600600  | 0.87380800  | -0.00001300 |
|                                                                                    | C  | 1.32335100  | -0.48849500 | 0.00003300  |
|                                                                                    | C  | 0.19641700  | -1.36003200 | 0.00009900  |
|                                                                                    | C  | -1.06300200 | -0.84412100 | -0.00004700 |
|                                                                                    | H  | -2.23217500 | 0.80327800  | -0.00013100 |
|                                                                                    | H  | -0.50008600 | 2.62001400  | -0.00009000 |
|                                                                                    | H  | 2.08731500  | 1.47759800  | 0.00004400  |
|                                                                                    | H  | 2.30950600  | -0.94569500 | 0.00014600  |
|                                                                                    | H  | 0.32714500  | -2.43361500 | 0.00019900  |
|                                                                                    | H  | -1.94227700 | -1.47698000 | -0.00005200 |
|  | C  | 3.82324200  | -0.64094700 | -0.12100700 |
|                                                                                    | C  | 3.78012900  | 0.69315100  | -0.13675700 |
|                                                                                    | C  | 2.60228000  | 1.52499600  | -0.39142100 |
|                                                                                    | C  | 1.31067000  | 1.20904200  | -0.25074300 |
|                                                                                    | N  | 0.72866700  | -0.01161500 | 0.18286700  |
|                                                                                    | B  | 1.35591000  | -1.28485300 | -0.00688600 |
|                                                                                    | N  | 2.73464200  | -1.51082700 | -0.28465700 |
|                                                                                    | Si | -0.96061000 | 0.05787300  | 0.73782100  |
|                                                                                    | C  | -2.14982200 | -0.08754000 | -0.73745100 |
|                                                                                    | C  | -1.26237300 | -1.31827300 | 1.97403300  |
|                                                                                    | C  | -1.20434100 | 1.70879100  | 1.60011500  |
|                                                                                    | C  | -3.58535300 | 0.16245600  | -0.25078800 |
|                                                                                    | C  | -1.79158600 | 0.95061100  | -1.81069600 |
|                                                                                    | C  | -2.06243900 | -1.48792400 | -1.35981600 |
|                                                                                    | H  | 4.77324100  | -1.13978300 | 0.03839400  |
|                                                                                    | H  | 4.71939000  | 1.21115400  | 0.01547800  |
|                                                                                    | H  | 2.79959600  | 2.53258200  | -0.74091200 |
|                                                                                    | H  | 0.58707800  | 1.98022800  | -0.50065800 |
|                                                                                    | H  | 0.68141600  | -2.26609700 | 0.07558000  |
|                                                                                    | H  | 3.00372800  | -2.47523100 | -0.39765200 |
|                                                                                    | H  | -2.25375700 | -1.20528400 | 2.42175200  |
|                                                                                    | H  | -0.52590600 | -1.26779400 | 2.78029100  |
|                                                                                    | H  | -1.20402800 | -2.31178800 | 1.52766500  |
|                                                                                    | H  | -0.36346600 | 1.91477200  | 2.26764600  |
|                                                                                    | H  | -1.29367200 | 2.54870400  | 0.90729500  |
|                                                                                    | H  | -2.11476700 | 1.68233100  | 2.20471600  |
|                                                                                    | H  | -4.28784400 | 0.06767200  | -1.08727200 |
|                                                                                    | H  | -3.88762600 | -0.55991500 | 0.51386000  |
|                                                                                    | H  | -3.70286700 | 1.16735900  | 0.16570900  |
|                                                                                    | H  | -2.49250900 | 0.87731800  | -2.65083100 |
|                                                                                    | H  | -0.78388100 | 0.78916600  | -2.20454400 |
|                                                                                    | H  | -1.84972100 | 1.97427200  | -1.42722600 |
|                                                                                    | H  | -2.33756600 | -2.26939800 | -0.64570100 |
|                                                                                    | H  | -2.74858300 | -1.56216700 | -2.21201900 |
|                                                                                    | H  | -1.05486900 | -1.70314700 | -1.72692000 |

| B3LYP/6-311+G(d,p)//M06-2X/6-311+G(d,p)                                            |    |             |                         |
|------------------------------------------------------------------------------------|----|-------------|-------------------------|
| 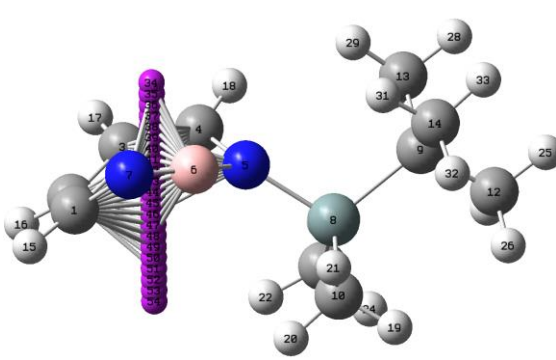 | C  | -3.66123600 | 0.76718100 -0.03605600  |
|                                                                                    | C  | -3.59466600 | -0.54809400 0.30490100  |
|                                                                                    | C  | -2.61777600 | -1.52129500 -0.18345200 |
|                                                                                    | C  | -1.33113300 | -1.32225100 -0.52183400 |
|                                                                                    | N  | -0.66994400 | -0.04092300 -0.36124900 |
|                                                                                    | B  | -1.62792400 | 0.87480800 -0.71138300  |
|                                                                                    | N  | -2.78945500 | 1.43183200 -0.90955400  |
|                                                                                    | Si | 0.79452400  | 0.18091900 0.62800300   |
|                                                                                    | C  | 2.31157500  | -0.07684300 -0.47179400 |
|                                                                                    | C  | 0.69860000  | 1.93406300 1.27093400   |
|                                                                                    | C  | 0.71357100  | -1.08700100 1.99908100  |
|                                                                                    | C  | 3.56619800  | -0.17913500 0.40837400  |
|                                                                                    | C  | 2.15282400  | -1.36949200 -1.28533400 |
|                                                                                    | C  | 2.45679600  | 1.10770200 -1.43725200  |
|                                                                                    | H  | -4.49038400 | 1.35943900 0.34553400   |
|                                                                                    | H  | -4.40798800 | -0.94447400 0.90180400  |
|                                                                                    | H  | -2.98074100 | -2.53703400 -0.31311400 |
|                                                                                    | H  | -0.73042900 | -2.11628000 -0.95309100 |
|                                                                                    | H  | 1.61857400  | 2.21077200 1.79265300   |
|                                                                                    | H  | -0.13234800 | 2.04145900 1.97248800   |
|                                                                                    | H  | 0.54927600  | 2.65334800 0.46110000   |
|                                                                                    | H  | -0.25956600 | -1.04001200 2.49445600  |
|                                                                                    | H  | 0.84602400  | -2.10436800 1.62249100  |
|                                                                                    | H  | 1.48896600  | -0.90131600 2.74654600  |
|                                                                                    | H  | 4.45838600  | -0.28073300 -0.22001200 |
|                                                                                    | H  | 3.70430200  | 0.71164700 1.02971800   |
|                                                                                    | H  | 3.52634300  | -1.05014000 1.06886900  |
|                                                                                    | H  | 3.05072300  | -1.54481300 -1.88909200 |
|                                                                                    | H  | 1.30219900  | -1.30591600 -1.96996500 |
|                                                                                    | H  | 2.01518300  | -2.24556500 -0.64329900 |
|                                                                                    | H  | 1.56016300  | 1.24013000 -2.05122700  |
|                                                                                    | H  | 2.64517300  | 2.04356800 -0.90379400  |
|                                                                                    | H  | 3.29969800  | 0.93800600 -2.11698700  |
|                                                                                    | Bq | -2.26360500 | 0.06884900 -2.00000000  |
|                                                                                    | Bq | -2.26360500 | 0.06884900 -1.80000000  |
|                                                                                    | Bq | -2.26360500 | 0.06884900 -1.60000000  |
|                                                                                    | Bq | -2.26360500 | 0.06884900 -1.40000000  |
|                                                                                    | Bq | -2.26360500 | 0.06884900 -1.20000000  |
|                                                                                    | Bq | -2.26360500 | 0.06884900 -1.00000000  |
|                                                                                    | Bq | -2.26360500 | 0.06884900 -0.80000000  |
|                                                                                    | Bq | -2.26360500 | 0.06884900 -0.60000000  |
|                                                                                    | Bq | -2.26360500 | 0.06884900 -0.40000000  |
|                                                                                    | Bq | -2.26360500 | 0.06884900 -0.20000000  |
|                                                                                    | Bq | -2.26360500 | 0.06884900 0.00000000   |
|                                                                                    | Bq | -2.26360500 | 0.06884900 0.20000000   |
|                                                                                    | Bq | -2.26360500 | 0.06884900 0.40000000   |
|                                                                                    | Bq | -2.26360500 | 0.06884900 0.60000000   |
|                                                                                    | Bq | -2.26360500 | 0.06884900 0.80000000   |
|                                                                                    | Bq | -2.26360500 | 0.06884900 1.00000000   |
|                                                                                    | Bq | -2.26360500 | 0.06884900 1.20000000   |
|                                                                                    | Bq | -2.26360500 | 0.06884900 1.40000000   |
|                                                                                    | Bq | -2.26360500 | 0.06884900 1.60000000   |
|                                                                                    | Bq | -2.26360500 | 0.06884900 1.80000000   |
|                                                                                    | Bq | -2.26360500 | 0.06884900 2.00000000   |

| B3LYP/6-311+G(d,p)//M06-2X/6-311+G(d,p)                                             |    |             |                         |
|-------------------------------------------------------------------------------------|----|-------------|-------------------------|
| 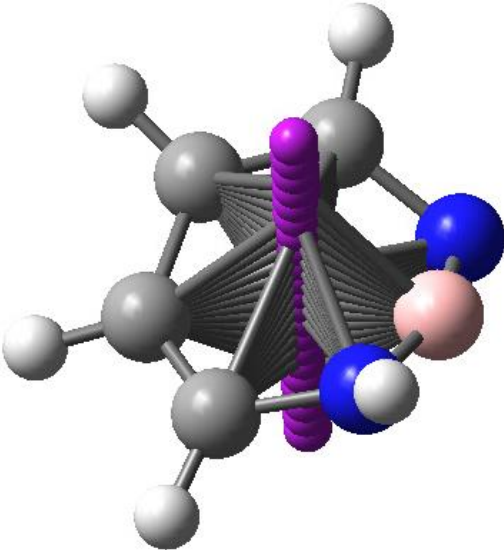   | C  | 1.61484900  | 0.08542100 0.12509200   |
|                                                                                     | C  | 0.82487500  | 1.18443900 0.23005300   |
|                                                                                     | C  | -0.57926500 | 1.30529900 -0.17110300  |
|                                                                                     | C  | -1.54459900 | 0.37103200 -0.15651700  |
|                                                                                     | N  | -1.29772900 | -0.97486700 0.28693400  |
|                                                                                     | B  | -0.00880400 | -1.30738800 -0.03892000 |
|                                                                                     | N  | 1.22445900  | -1.15253600 -0.41624900 |
|                                                                                     | H  | 2.65794700  | 0.16371200 0.42265100   |
|                                                                                     | H  | 1.30068500  | 2.10053200 0.56092600   |
|                                                                                     | H  | -0.88530400 | 2.28267500 -0.53257500  |
|                                                                                     | H  | -2.54063000 | 0.57277800 -0.53334900  |
|                                                                                     | H  | -1.87095100 | -1.36808600 1.01700200  |
|                                                                                     | Bq | 0.00000000  | 0.00000000 -2.00000000  |
|                                                                                     | Bq | 0.00000000  | 0.00000000 -1.80000000  |
|                                                                                     | Bq | 0.00000000  | 0.00000000 -1.60000000  |
|                                                                                     | Bq | 0.00000000  | 0.00000000 -1.40000000  |
|                                                                                     | Bq | 0.00000000  | 0.00000000 -1.20000000  |
|                                                                                     | Bq | 0.00000000  | 0.00000000 -1.00000000  |
|                                                                                     | Bq | 0.00000000  | 0.00000000 -0.80000000  |
|                                                                                     | Bq | 0.00000000  | 0.00000000 -0.60000000  |
|                                                                                     | Bq | 0.00000000  | 0.00000000 -0.40000000  |
|                                                                                     | Bq | 0.00000000  | 0.00000000 -0.20000000  |
|                                                                                     | Bq | 0.00000000  | 0.00000000 0.00000000   |
|                                                                                     | Bq | 0.00000000  | 0.00000000 0.20000000   |
|                                                                                     | Bq | 0.00000000  | 0.00000000 0.40000000   |
|                                                                                     | Bq | 0.00000000  | 0.00000000 0.60000000   |
|                                                                                     | Bq | 0.00000000  | 0.00000000 0.80000000   |
|                                                                                     | Bq | 0.00000000  | 0.00000000 1.00000000   |
|                                                                                     | Bq | 0.00000000  | 0.00000000 1.20000000   |
|                                                                                     | Bq | 0.00000000  | 0.00000000 1.40000000   |
|                                                                                     | Bq | 0.00000000  | 0.00000000 1.60000000   |
|                                                                                     | Bq | 0.00000000  | 0.00000000 1.80000000   |
|                                                                                     | Bq | 0.00000000  | 0.00000000 2.00000000   |
|  | N  | -1.32268300 | -0.76818700 0.00000000  |
|                                                                                     | C  | -1.22955700 | 0.58298900 0.00000000   |
|                                                                                     | C  | 0.00000000  | 1.23637800 0.00000000   |
|                                                                                     | C  | 1.20821900  | 0.50692200 0.00000000   |
|                                                                                     | C  | 1.28356900  | -0.89329100 0.00000000  |
|                                                                                     | H  | 0.02886700  | 2.31790200 0.00000000   |
|                                                                                     | H  | -2.15502600 | 1.15370900 0.00000000   |
|                                                                                     | H  | 2.14005800  | 1.06665900 0.00000000   |
|                                                                                     | H  | 2.22511000  | -1.41638200 0.00000000  |
|                                                                                     | B  | -0.11072200 | -1.26851200 0.00000000  |
|                                                                                     | Bq | 0.00000000  | 0.00000000 -2.00000000  |
|                                                                                     | Bq | 0.00000000  | 0.00000000 -1.80000000  |
|                                                                                     | Bq | 0.00000000  | 0.00000000 -1.60000000  |
|                                                                                     | Bq | 0.00000000  | 0.00000000 -1.40000000  |
|                                                                                     | Bq | 0.00000000  | 0.00000000 -1.20000000  |
|                                                                                     | Bq | 0.00000000  | 0.00000000 -1.00000000  |
|                                                                                     | Bq | 0.00000000  | 0.00000000 -0.80000000  |
|                                                                                     | Bq | 0.00000000  | 0.00000000 -0.60000000  |
|                                                                                     | Bq | 0.00000000  | 0.00000000 -0.40000000  |
|                                                                                     | Bq | 0.00000000  | 0.00000000 -0.20000000  |
|                                                                                     | Bq | 0.00000000  | 0.00000000 0.00000000   |
|                                                                                     | Bq | 0.00000000  | 0.00000000 0.20000000   |
|                                                                                     | Bq | 0.00000000  | 0.00000000 0.40000000   |
|                                                                                     | Bq | 0.00000000  | 0.00000000 0.60000000   |
|                                                                                     | Bq | 0.00000000  | 0.00000000 0.80000000   |
|                                                                                     | Bq | 0.00000000  | 0.00000000 1.00000000   |
|                                                                                     | Bq | 0.00000000  | 0.00000000 1.20000000   |
|                                                                                     | Bq | 0.00000000  | 0.00000000 1.40000000   |

|                                                                                     |    |             |             |             |
|-------------------------------------------------------------------------------------|----|-------------|-------------|-------------|
|                                                                                     | Bq | 0.00000000  | 0.00000000  | 1.60000000  |
|                                                                                     | Bq | 0.00000000  | 0.00000000  | 1.80000000  |
|                                                                                     | Bq | 0.00000000  | 0.00000000  | 2.00000000  |
| 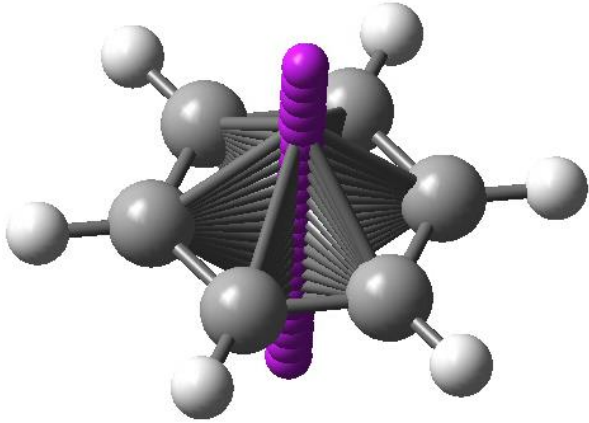   | C  | 0.38290700  | 1.33759100  | -0.00000100 |
|                                                                                     | C  | 1.34986100  | 0.33715000  | 0.00002000  |
|                                                                                     | C  | 0.96697000  | -1.00037800 | -0.00001900 |
|                                                                                     | C  | -0.38296500 | -1.33757400 | 0.00000300  |
|                                                                                     | C  | -1.34984600 | -0.33720700 | 0.00001600  |
|                                                                                     | C  | -0.96692800 | 1.00041900  | -0.00001600 |
|                                                                                     | H  | 0.68118600  | 2.37929800  | -0.00000100 |
|                                                                                     | H  | 2.40113100  | 0.59977000  | 0.00001000  |
|                                                                                     | H  | 1.71990000  | -1.77963500 | -0.00001800 |
|                                                                                     | H  | -0.68110900 | -2.37932000 | -0.00000700 |
|                                                                                     | H  | -2.40115000 | -0.59969700 | 0.00001500  |
|                                                                                     | H  | -1.71995600 | 1.77958100  | -0.00002500 |
|                                                                                     | Bq | 0.00000000  | 0.00000000  | -2.00000000 |
|                                                                                     | Bq | 0.00000000  | 0.00000000  | -1.80000000 |
|                                                                                     | Bq | 0.00000000  | 0.00000000  | -1.60000000 |
|                                                                                     | Bq | 0.00000000  | 0.00000000  | -1.40000000 |
|                                                                                     | Bq | 0.00000000  | 0.00000000  | -1.20000000 |
|                                                                                     | Bq | 0.00000000  | 0.00000000  | -1.00000000 |
|                                                                                     | Bq | 0.00000000  | 0.00000000  | -0.80000000 |
|                                                                                     | Bq | 0.00000000  | 0.00000000  | -0.60000000 |
|                                                                                     | Bq | 0.00000000  | 0.00000000  | -0.40000000 |
|                                                                                     | Bq | 0.00000000  | 0.00000000  | -0.20000000 |
|                                                                                     | Bq | 0.00000000  | 0.00000000  | 0.00000000  |
|                                                                                     | Bq | 0.00000000  | 0.00000000  | 0.20000000  |
|                                                                                     | Bq | 0.00000000  | 0.00000000  | 0.40000000  |
|                                                                                     | Bq | 0.00000000  | 0.00000000  | 0.60000000  |
|                                                                                     | Bq | 0.00000000  | 0.00000000  | 0.80000000  |
|                                                                                     | Bq | 0.00000000  | 0.00000000  | 1.00000000  |
|                                                                                     | Bq | 0.00000000  | 0.00000000  | 1.20000000  |
|                                                                                     | Bq | 0.00000000  | 0.00000000  | 1.40000000  |
|                                                                                     | Bq | 0.00000000  | 0.00000000  | 1.60000000  |
|                                                                                     | Bq | 0.00000000  | 0.00000000  | 1.80000000  |
|                                                                                     | Bq | 0.00000000  | 0.00000000  | 2.00000000  |
|  | C  | 0.70192500  | 1.05194300  | 0.00001300  |
|                                                                                     | C  | -0.70191300 | 1.05194900  | 0.00001100  |
|                                                                                     | C  | -1.45877600 | -0.13281000 | 0.00002600  |
|                                                                                     | C  | -0.61973600 | -1.23033400 | -0.00004200 |
|                                                                                     | C  | 0.61972000  | -1.23033300 | -0.00004000 |
|                                                                                     | C  | 1.45877700  | -0.13282500 | 0.00003000  |
|                                                                                     | H  | 1.22521800  | 2.00186800  | -0.00000100 |
|                                                                                     | H  | -1.22519600 | 2.00188000  | -0.00000500 |
|                                                                                     | H  | -2.54012000 | -0.13462800 | 0.00000400  |
|                                                                                     | H  | 2.54012000  | -0.13465600 | 0.00001200  |
|                                                                                     | Bq | 0.00000000  | 0.00000000  | -2.00000000 |
|                                                                                     | Bq | 0.00000000  | 0.00000000  | -1.80000000 |
|                                                                                     | Bq | 0.00000000  | 0.00000000  | -1.60000000 |
|                                                                                     | Bq | 0.00000000  | 0.00000000  | -1.40000000 |
|                                                                                     | Bq | 0.00000000  | 0.00000000  | -1.20000000 |
|                                                                                     | Bq | 0.00000000  | 0.00000000  | -1.00000000 |
|                                                                                     | Bq | 0.00000000  | 0.00000000  | -0.80000000 |
|                                                                                     | Bq | 0.00000000  | 0.00000000  | -0.60000000 |
|                                                                                     | Bq | 0.00000000  | 0.00000000  | -0.40000000 |
|                                                                                     | Bq | 0.00000000  | 0.00000000  | -0.20000000 |
|                                                                                     | Bq | 0.00000000  | 0.00000000  | 0.00000000  |
|                                                                                     | Bq | 0.00000000  | 0.00000000  | 0.20000000  |
|                                                                                     | Bq | 0.00000000  | 0.00000000  | 0.40000000  |
|                                                                                     | Bq | 0.00000000  | 0.00000000  | 0.60000000  |
|                                                                                     | Bq | 0.00000000  | 0.00000000  | 0.80000000  |
|                                                                                     | Bq | 0.00000000  | 0.00000000  | 1.00000000  |

|  |    |            |            |            |
|--|----|------------|------------|------------|
|  | Bq | 0.00000000 | 0.00000000 | 1.20000000 |
|  | Bq | 0.00000000 | 0.00000000 | 1.40000000 |
|  | Bq | 0.00000000 | 0.00000000 | 1.60000000 |
|  | Bq | 0.00000000 | 0.00000000 | 1.80000000 |
|  | Bq | 0.00000000 | 0.00000000 | 2.00000000 |

| SMD(DCM)/MN15/def2-TZVP |   |             |             |             |
|-------------------------|---|-------------|-------------|-------------|
| 7a                      | B | 0.00062300  | -0.00111800 | 0.00069500  |
|                         | C | -0.42197300 | -1.50492700 | 0.00104300  |
|                         | C | -1.59280800 | -1.93377900 | 0.64777200  |
|                         | C | 0.35295200  | -2.48188300 | -0.64553800 |
|                         | C | -1.96435700 | -3.27193500 | 0.66403600  |
|                         | H | -2.21236400 | -1.20461800 | 1.15908200  |
|                         | C | -0.02848300 | -3.81728500 | -0.66144900 |
|                         | H | 1.26181600  | -2.18339800 | -1.15724900 |
|                         | C | -1.18532200 | -4.21525600 | 0.00132600  |
|                         | H | -2.86239700 | -3.57998900 | 1.18589600  |
|                         | H | 0.57677300  | -4.54901500 | -1.18292400 |
|                         | H | -1.47909800 | -5.25811600 | 0.00141200  |
|                         | C | 1.51398500  | 0.38600800  | -0.00020500 |
|                         | C | 2.47295100  | -0.41247000 | 0.64466000  |
|                         | C | 1.96983100  | 1.54723300  | -0.64582700 |
|                         | C | 3.81697000  | -0.06258500 | 0.65998700  |
|                         | H | 2.15357000  | -1.31470700 | 1.15546500  |
|                         | C | 3.31631700  | 1.88730900  | -0.66256900 |
|                         | H | 1.25514200  | 2.18433000  | -1.15598900 |
|                         | C | 4.24153200  | 1.08547700  | -0.00156100 |
|                         | H | 4.53464800  | -0.68557200 | 1.18010500  |
|                         | H | 3.64500400  | 2.77854800  | -1.18348500 |
|                         | H | 5.29106100  | 1.35450200  | -0.00209100 |
|                         | C | -1.09084900 | 1.11644400  | 0.00073000  |
|                         | C | -0.87894600 | 2.34402100  | 0.64966200  |
|                         | C | -2.32275400 | 0.93388600  | -0.64894100 |
|                         | C | -1.85262200 | 3.33433400  | 0.66489000  |
|                         | H | 0.06102800  | 2.51590500  | 1.16336500  |
|                         | C | -3.28874900 | 1.93169200  | -0.66637100 |
|                         | H | -2.51715500 | -0.00210300 | -1.16191900 |
|                         | C | -3.05722100 | 3.13170000  | -0.00131200 |
|                         | H | -1.67208900 | 4.26561300  | 1.18819100  |
|                         | H | -4.22367000 | 1.77351500  | -1.19041000 |
|                         | H | -3.81382800 | 3.90729100  | -0.00223100 |
| 7b                      | B | 0.00017900  | -0.00340600 | 0.00055100  |
|                         | C | 1.35704600  | -0.77517000 | 0.00054000  |
|                         | C | 2.49334100  | -0.25311000 | 0.63907400  |
|                         | C | 1.49239500  | -2.01831000 | -0.63800000 |
|                         | C | 3.70089600  | -0.93544200 | 0.65829700  |
|                         | H | 2.42753700  | 0.70226400  | 1.14779400  |
|                         | C | 2.69813800  | -2.70397500 | -0.65748000 |
|                         | H | 0.63890000  | -2.45279500 | -1.14657700 |
|                         | C | 3.78972800  | -2.15413500 | 0.00015000  |
|                         | H | 4.56511500  | -0.53046100 | 1.16879000  |
|                         | H | 2.79417200  | -3.65332700 | -1.16841300 |
|                         | C | -0.00845600 | 1.55758700  | 0.00114900  |
|                         | C | 1.00120500  | 2.29438200  | -0.63834100 |
|                         | C | -1.02640800 | 2.28254300  | 0.64104300  |
|                         | C | 0.99507500  | 3.68141500  | -0.65753200 |
|                         | H | 1.80247500  | 1.77073100  | -1.14786000 |
|                         | C | -1.03613300 | 3.66954300  | 0.66083900  |
|                         | H | -1.82172900 | 1.74956300  | 1.15023400  |
|                         | C | -0.02442000 | 4.35391600  | 0.00177700  |

|                          |    |             |             |             |
|--------------------------|----|-------------|-------------|-------------|
|                          | H  | 1.77013700  | 4.23744800  | -1.16900500 |
|                          | H  | -1.81744000 | 4.21653100  | 1.17254300  |
|                          | C  | -1.34815000 | -0.78998000 | -0.00002800 |
|                          | C  | -1.46986800 | -2.03490900 | 0.63776500  |
|                          | C  | -2.49004900 | -0.28012800 | -0.63841800 |
|                          | C  | -2.66792200 | -2.73394500 | 0.65657100  |
|                          | H  | -0.61169100 | -2.46016600 | 1.14625300  |
|                          | C  | -3.68996700 | -0.97577500 | -0.65823100 |
|                          | H  | -2.43483800 | 0.67620200  | -1.14659200 |
|                          | C  | -3.76541000 | -2.19585000 | -0.00096400 |
|                          | H  | -2.75341000 | -3.68460800 | 1.16694000  |
|                          | H  | -4.55855200 | -0.58002200 | -1.16854200 |
|                          | Cl | -0.03436900 | 6.08363300  | 0.00207700  |
| <b>7c</b>                | Cl | 5.29492300  | -3.00624700 | -0.00072000 |
|                          | Cl | -5.26103500 | -3.06469700 | -0.00121900 |
|                          | B  | 0.00034500  | 0.00000800  | -0.00067900 |
|                          | C  | 1.12321600  | 1.08427500  | -0.00037300 |
|                          | C  | 2.34397600  | 0.85219200  | -0.65115300 |
|                          | C  | 0.93247800  | 2.31188300  | 0.65101500  |
|                          | C  | 3.32152500  | 1.82390000  | -0.65792200 |
|                          | H  | 2.53806200  | -0.07769900 | -1.17224600 |
|                          | C  | 1.93643600  | 3.25624500  | 0.65819400  |
|                          | H  | 0.00956100  | 2.53651800  | 1.17223700  |
|                          | C  | 3.13524400  | 3.02975000  | 0.00004600  |
|                          | C  | 0.37762500  | -1.51472200 | -0.00070800 |
|                          | C  | 1.53540300  | -1.96472200 | 0.65105200  |
|                          | C  | -0.43401900 | -2.45501300 | -0.65245600 |
|                          | C  | 1.84997100  | -3.30665000 | 0.65803400  |
|                          | H  | 2.19214600  | -1.27884200 | 1.17270700  |
|                          | C  | -0.08268200 | -3.78783600 | -0.65914300 |
|                          | H  | -1.33537200 | -2.15697400 | -1.17457700 |
|                          | C  | 1.05367600  | -4.23087000 | -0.00025800 |
|                          | C  | -1.50016800 | 0.43054000  | -0.00042600 |
|                          | C  | -1.90954200 | 1.60293600  | -0.65297200 |
|                          | C  | -2.46805100 | -0.34694300 | 0.65267100  |
|                          | C  | -3.23963900 | 1.96428300  | -0.65962000 |
|                          | H  | -1.20117900 | 2.23479500  | -1.17537500 |
|                          | C  | -3.78766700 | 0.05118900  | 0.66005300  |
|                          | H  | -2.20158700 | -1.25784200 | 1.17533500  |
|                          | C  | -4.19084900 | 1.20162400  | 0.00008300  |
|                          | F  | 4.08876000  | 3.95213900  | -0.00015900 |
|                          | F  | 4.48077500  | 1.63040400  | -1.29091600 |
|                          | F  | 1.78184100  | 4.42124000  | 1.29136700  |
|                          | F  | 2.93570600  | -3.75634400 | 1.29114600  |
|                          | F  | 1.37408900  | -5.51831600 | -0.00000900 |
|                          | F  | -0.83043900 | -4.69427700 | -1.29259000 |
|                          | F  | -3.65148900 | 3.06450600  | -1.29346600 |
|                          | F  | -5.46613500 | 1.56739200  | 0.00044100  |
|                          | F  | -4.71935500 | -0.66320700 | 1.29535500  |
| <b>Pyridine (8a)</b>     | C  | -1.14259200 | -0.71900000 | -0.00021700 |
|                          | C  | -1.19399900 | 0.66871400  | -0.00012500 |
|                          | C  | 0.00014600  | 1.37642500  | 0.00010500  |
|                          | C  | 1.19414300  | 0.66848300  | 0.00021300  |
|                          | C  | 1.14243600  | -0.71922400 | 0.00011800  |
|                          | N  | -0.00014600 | -1.40906000 | -0.00009000 |
|                          | H  | 0.00020700  | 2.45938000  | 0.00016300  |
|                          | H  | -2.05840200 | -1.30060300 | -0.00037600 |
|                          | H  | -2.14917800 | 1.17688400  | -0.00024500 |
|                          | H  | 2.14946300  | 1.17638600  | 0.00034800  |
| <b>Acetonitrile (8b)</b> | H  | 2.05812500  | -1.30101500 | 0.00017900  |
|                          | N  | 0.00000000  | 0.00000000  | 1.42906400  |
|                          | C  | 0.00000000  | 0.00000000  | 0.27783500  |

|                   |   |             |             |             |
|-------------------|---|-------------|-------------|-------------|
|                   | C | 0.00000000  | 0.00000000  | -1.17399100 |
|                   | H | 0.00000000  | 1.02496800  | -1.54217100 |
|                   | H | 0.88764800  | -0.51248400 | -1.54217100 |
|                   | H | -0.88764800 | -0.51248400 | -1.54217100 |
| Benzaldehyde (8c) | C | -1.72052400 | 1.06346800  | 0.00000500  |
|                   | C | -2.20659100 | -0.23918400 | -0.00000300 |
|                   | C | -1.32860000 | -1.32323200 | -0.00000600 |
|                   | C | 0.03871500  | -1.10445400 | -0.00001100 |
|                   | C | 0.52993400  | 0.20257400  | 0.00000100  |
|                   | C | -0.34921400 | 1.28360000  | 0.00001800  |
|                   | H | -2.40735500 | 1.90032600  | 0.00001200  |
|                   | H | -3.27547200 | -0.41453600 | -0.00000400 |
|                   | H | -1.71764700 | -2.33366700 | -0.00000600 |
|                   | H | 0.73988900  | -1.93043900 | -0.00002000 |
|                   | H | 0.05020300  | 2.29239800  | 0.00003300  |
|                   | C | 1.98020100  | 0.46630400  | -0.00000800 |
|                   | H | 2.25651900  | 1.53659400  | -0.00021900 |
|                   | O | 2.83629200  | -0.39314200 | 0.00002700  |
| 7a•8a             | B | -0.02041000 | 0.01958400  | -0.06134200 |
|                   | C | -1.03716900 | -1.15792300 | -0.52390600 |
|                   | C | -1.37740100 | -2.28825700 | 0.22565500  |
|                   | C | -1.72900800 | -0.98291600 | -1.73367300 |
|                   | C | -2.33332400 | -3.20620700 | -0.21033500 |
|                   | H | -0.90373800 | -2.46835800 | 1.18645700  |
|                   | C | -2.67834900 | -1.89021700 | -2.18370500 |
|                   | H | -1.52043100 | -0.09907300 | -2.33177400 |
|                   | C | -2.98386500 | -3.01562100 | -1.42110400 |
|                   | H | -2.56982300 | -4.06852600 | 0.40284900  |
|                   | H | -3.18669000 | -1.71897700 | -3.12581500 |
|                   | H | -3.72552900 | -3.72674200 | -1.76485700 |
|                   | C | 1.21240400  | 0.29677800  | -1.08645600 |
|                   | C | 1.41187400  | -0.37396900 | -2.29609200 |
|                   | C | 2.19268600  | 1.23362500  | -0.72198200 |
|                   | C | 2.51556100  | -0.11619000 | -3.10927100 |
|                   | H | 0.69658400  | -1.12443300 | -2.61591400 |
|                   | C | 3.29764600  | 1.50109300  | -1.51960500 |
|                   | H | 2.08307600  | 1.76922900  | 0.21925700  |
|                   | C | 3.46171500  | 0.82487800  | -2.72637200 |
|                   | H | 2.63576800  | -0.65698800 | -4.04121500 |
|                   | H | 4.03146400  | 2.23382200  | -1.20348400 |
|                   | H | 4.32034700  | 1.02770000  | -3.35544800 |
|                   | C | -0.92495500 | 1.33770700  | 0.23995500  |
|                   | C | -2.01265000 | 1.24245000  | 1.12432400  |
|                   | C | -0.75653100 | 2.56440500  | -0.40831700 |
|                   | C | -2.86451900 | 2.31009500  | 1.37125200  |
|                   | H | -2.19636600 | 0.29646800  | 1.62986200  |
|                   | C | -1.61268800 | 3.64275900  | -0.18170200 |
|                   | H | 0.05483600  | 2.68643500  | -1.11806000 |
|                   | C | -2.66601000 | 3.52270900  | 0.71378000  |
|                   | H | -3.68965600 | 2.19746800  | 2.06530400  |
|                   | H | -1.45365900 | 4.57637000  | -0.70939800 |
|                   | H | -3.33201200 | 4.35834100  | 0.89345800  |
|                   | N | 0.73760100  | -0.46062900 | 1.30654900  |
|                   | C | 1.48532500  | -1.57574500 | 1.21847400  |
|                   | C | 0.72301000  | 0.22521300  | 2.45586400  |
|                   | C | 2.22072800  | -2.05085800 | 2.28279800  |
|                   | H | 1.47733000  | -2.07227700 | 0.25658000  |
|                   | C | 1.44187100  | -0.19011800 | 3.56403300  |
|                   | H | 0.12762500  | 1.12655200  | 2.47174600  |
|                   | C | 2.19917000  | -1.34715400 | 3.48166700  |
|                   | H | 2.80356500  | -2.95342700 | 2.16632900  |
|                   | H | 1.40290800  | 0.39754000  | 4.47017300  |



|              |    |             |             |             |
|--------------|----|-------------|-------------|-------------|
| <b>7b•8b</b> | H  | 2.77010700  | -1.69386000 | 4.33313400  |
|              | B  | 0.00412200  | -0.00152100 | 0.63993700  |
|              | C  | -0.43472200 | 1.49544100  | 0.20968700  |
|              | C  | -1.54010600 | 2.11451800  | 0.80747600  |
|              | C  | 0.20894600  | 2.19925900  | -0.81062100 |
|              | C  | -1.98339600 | 3.37231700  | 0.42178900  |
|              | H  | -2.08039000 | 1.59619600  | 1.59515200  |
|              | C  | -0.21902000 | 3.45861900  | -1.22339600 |
|              | H  | 1.06926400  | 1.75976300  | -1.30495400 |
|              | C  | -1.31192800 | 4.03372500  | -0.59749800 |
|              | H  | -2.83849600 | 3.83586600  | 0.89792700  |
|              | H  | 0.29138200  | 3.98747100  | -2.01868400 |
|              | C  | -1.07709400 | -1.12450200 | 0.20347100  |
|              | C  | -2.03280500 | -0.89832000 | -0.78944500 |
|              | C  | -1.04201700 | -2.40564300 | 0.76955700  |
|              | C  | -2.91532400 | -1.89216000 | -1.20586700 |
|              | H  | -2.09769200 | 0.07776800  | -1.25914100 |
|              | C  | -1.91423400 | -3.41264900 | 0.37923000  |
|              | H  | -0.30415400 | -2.63070000 | 1.53498000  |
|              | C  | -2.84761700 | -3.14087400 | -0.61188600 |
|              | H  | -3.64796200 | -1.69826200 | -1.97930100 |
|              | H  | -1.87265900 | -4.39626600 | 0.83030900  |
|              | C  | 1.51381300  | -0.37059100 | 0.18650700  |
|              | C  | 2.61110500  | 0.28303800  | 0.76235100  |
|              | C  | 1.78735100  | -1.28870600 | -0.82980600 |
|              | C  | 3.91644500  | 0.03530200  | 0.35993300  |
|              | H  | 2.44407400  | 1.01702900  | 1.54610900  |
|              | C  | 3.08613700  | -1.55093900 | -1.25900500 |
|              | H  | 0.97002300  | -1.81867500 | -1.30802800 |
|              | C  | 4.13928500  | -0.88613900 | -0.65420900 |
|              | H  | 4.75173600  | 0.54856100  | 0.81995800  |
|              | H  | 3.27796800  | -2.26477600 | -2.05039700 |
|              | Cl | -3.94540400 | -4.38818000 | -1.11306600 |
|              | Cl | -1.85368700 | 5.60602100  | -1.09393900 |
|              | Cl | 5.76450900  | -1.20733600 | -1.17126300 |
|              | N  | 0.01821300  | -0.01078000 | 2.23137100  |
|              | C  | 0.03464700  | -0.02671200 | 3.37543500  |
|              | C  | 0.05947200  | -0.05249700 | 4.81736900  |
|              | H  | 0.06151300  | 0.96905900  | 5.19550100  |
|              | H  | -0.82271400 | -0.57766200 | 5.18195000  |
|              | H  | 0.95871300  | -0.56978300 | 5.15030700  |
| <b>7c•8c</b> | B  | 0.17808900  | -0.00357100 | -0.04442300 |
|              | C  | 0.41378300  | -1.25011200 | 0.95892400  |
|              | C  | -0.56573800 | -2.19726000 | 1.26284400  |
|              | C  | 1.65249300  | -1.35743100 | 1.60355500  |
|              | C  | -0.30920600 | -3.20571300 | 2.17491900  |
|              | H  | -1.54789500 | -2.19177700 | 0.80322500  |
|              | C  | 1.88613900  | -2.36508700 | 2.51481800  |
|              | H  | 2.45202800  | -0.65142100 | 1.40392800  |
|              | C  | 0.91224000  | -3.30573800 | 2.81310400  |
|              | C  | -0.15218900 | 1.38027800  | 0.72489300  |
|              | C  | -0.21032300 | 1.48396600  | 2.11515900  |
|              | C  | -0.41540100 | 2.52941100  | -0.03443000 |
|              | C  | -0.51296600 | 2.69301400  | 2.71666100  |
|              | H  | -0.02096700 | 0.63014700  | 2.75600900  |
|              | C  | -0.72462100 | 3.72249900  | 0.58245100  |
|              | H  | -0.37597400 | 2.50670600  | -1.11904200 |
|              | C  | -0.77554000 | 3.82297600  | 1.96512700  |
|              | C  | 1.38786000  | 0.13051800  | -1.10610200 |
|              | C  | 1.47608800  | -0.75140800 | -2.18951100 |
|              | C  | 2.41222500  | 1.06424200  | -0.93276800 |
|              | C  | 2.54413600  | -0.68675500 | -3.05969400 |

|                |   |             |             |             |
|----------------|---|-------------|-------------|-------------|
|                | H | 0.71711100  | -1.50527200 | -2.36684700 |
|                | C | 3.47960300  | 1.10595600  | -1.81019400 |
|                | H | 2.39756200  | 1.77458700  | -0.11322300 |
|                | C | 3.56055200  | 0.23851900  | -2.88432700 |
|                | F | 1.15118600  | -4.28299500 | 3.68708600  |
|                | F | -1.24504000 | -4.11839200 | 2.46161800  |
|                | F | 3.06559300  | -2.46968100 | 3.13689900  |
|                | F | -0.56606300 | 2.79944100  | 4.04906400  |
|                | F | -1.06961600 | 4.98190200  | 2.55159100  |
|                | F | -0.97986300 | 4.82363900  | -0.13258900 |
|                | F | 2.63264500  | -1.52119500 | -4.10316400 |
|                | F | 4.58827600  | 0.29235800  | -3.73180200 |
|                | F | 4.46544100  | 1.99676700  | -1.64763900 |
|                | O | -1.07217300 | -0.37885600 | -0.92876600 |
|                | C | -2.25703900 | -0.13421700 | -0.62506400 |
|                | H | -2.46799200 | 0.41025100  | 0.30036800  |
|                | C | -3.36204600 | -0.54338300 | -1.44251900 |
|                | C | -4.65147400 | -0.22293200 | -0.99975700 |
|                | C | -3.16729000 | -1.23960300 | -2.64520100 |
|                | C | -5.74788700 | -0.59955500 | -1.75703000 |
|                | H | -4.77327500 | 0.31665900  | -0.06748300 |
|                | C | -4.26565600 | -1.61053100 | -3.39392000 |
|                | H | -2.16163000 | -1.47432000 | -2.97115400 |
|                | C | -5.55071000 | -1.29051300 | -2.94849900 |
|                | H | -6.74940300 | -0.35888200 | -1.42653000 |
|                | H | -4.13456900 | -2.14710200 | -4.32423300 |
|                | H | -6.40736900 | -1.58504200 | -3.54201400 |
| 1              | N | -1.32421600 | -0.76236700 | 0.00000000  |
|                | C | -1.23140100 | 0.59267800  | 0.00000000  |
|                | C | 0.00000000  | 1.23287200  | 0.00000000  |
|                | C | 1.20756300  | 0.49979400  | 0.00000000  |
|                | C | 1.28494700  | -0.89731200 | 0.00000000  |
|                | H | 0.03736000  | 2.31418300  | 0.00000000  |
|                | H | -2.15194700 | 1.16921700  | 0.00000000  |
|                | H | 2.13787200  | 1.06095500  | 0.00000000  |
|                | H | 2.22640100  | -1.42114700 | 0.00000000  |
| 1●pyridine     | B | -0.10936500 | -1.27096800 | 0.00000000  |
|                | N | -1.39861400 | -1.20960700 | 0.19692700  |
|                | C | -2.73173300 | -1.23308100 | 0.20175400  |
|                | C | -3.53521400 | -0.11143300 | 0.02045900  |
|                | C | -2.94054400 | 1.14195500  | -0.18859900 |
|                | C | -1.56215400 | 1.29412100  | -0.21020000 |
|                | H | -4.61376000 | -0.21442800 | 0.03682300  |
|                | H | -3.22140700 | -2.19608700 | 0.35855000  |
|                | H | -3.58904500 | 2.00135900  | -0.34044400 |
|                | H | -1.16906800 | 2.29048700  | -0.39447900 |
|                | B | -0.78399900 | 0.03501100  | 0.00080900  |
|                | N | 0.77564800  | 0.02300100  | 0.00361700  |
|                | C | 1.42702200  | -1.13762100 | -0.19196400 |
|                | C | 1.47261400  | 1.15682800  | 0.19797200  |
|                | C | 2.80477400  | -1.19593500 | -0.20257300 |
|                | H | 0.79278200  | -2.00128600 | -0.33328400 |
|                | C | 2.85105100  | 1.16438200  | 0.19829400  |
|                | H | 0.89107200  | 2.05230700  | 0.36258600  |
|                | C | 3.53164900  | -0.02929900 | -0.00582700 |
|                | H | 3.29474400  | -2.14524100 | -0.36551400 |
| 1●acetonitrile | H | 3.37702400  | 2.09400700  | 0.36177100  |
|                | H | 4.61362300  | -0.04942400 | -0.00975200 |
|                | N | -0.71706000 | -1.25219300 | -0.00006000 |
|                | C | -2.05112500 | -1.23967700 | -0.00008300 |
|                | C | -2.82666800 | -0.08245800 | -0.00011000 |
|                | C | -2.21091400 | 1.17742400  | -0.00010800 |

|                |   |             |             |             |
|----------------|---|-------------|-------------|-------------|
|                | C | -0.82897800 | 1.29863700  | -0.00008200 |
|                | H | -3.90714500 | -0.16495500 | -0.00012900 |
|                | H | -2.56578600 | -2.20181500 | -0.00008700 |
|                | H | -2.84268000 | 2.06195200  | -0.00012300 |
|                | H | -0.38850000 | 2.29132200  | -0.00007600 |
|                | B | -0.09487200 | 0.00260000  | -0.00006500 |
|                | N | 1.43203600  | -0.00925100 | 0.00001100  |
|                | C | 2.57686500  | -0.00792200 | 0.00011300  |
|                | C | 4.01624300  | -0.00518600 | 0.00028500  |
|                | H | 4.37377400  | 0.50989000  | -0.89118300 |
|                | H | 4.37355200  | 0.51001000  | 0.89177300  |
|                | H | 4.37377600  | -1.03420000 | 0.00039800  |
| 1●benzaldehyde | N | -1.67715400 | 0.03767400  | 1.21422700  |
|                | C | -2.64621000 | -0.88087300 | 1.25305600  |
|                | C | -3.53010300 | -1.13304200 | 0.20800200  |
|                | C | -3.44447000 | -0.38279300 | -0.97674900 |
|                | C | -2.49007000 | 0.61045900  | -1.13646700 |
|                | H | -4.28612800 | -1.90121600 | 0.31892000  |
|                | H | -2.74719900 | -1.47043200 | 2.16589500  |
|                | H | -4.15342400 | -0.59550200 | -1.77325400 |
|                | H | -2.46243600 | 1.16921200  | -2.06718800 |
|                | B | -1.58625000 | 0.77774300  | 0.03482500  |
|                | O | -0.52074500 | 1.83361200  | 0.01560900  |
|                | C | 0.72501000  | 1.76520900  | 0.10709700  |
|                | C | 1.57823800  | 0.61726800  | 0.00344100  |
|                | H | 1.22462600  | 2.72278100  | 0.26111600  |
|                | C | 1.15290100  | -0.67855900 | -0.34061500 |
|                | C | 2.94146300  | 0.87373700  | 0.22658500  |
|                | C | 2.08646500  | -1.68982300 | -0.44499600 |
|                | H | 0.10801100  | -0.88513500 | -0.52682100 |
|                | C | 3.86711200  | -0.14994000 | 0.13643700  |
|                | H | 3.25430200  | 1.88244400  | 0.47013700  |
|                | C | 3.43588300  | -1.42907100 | -0.19853000 |
|                | H | 1.77038800  | -2.68878400 | -0.71427200 |
|                | H | 4.91566200  | 0.04413700  | 0.31798200  |
|                | H | 4.15616800  | -2.23425200 | -0.27467700 |
| 2              | C | -3.30564700 | 0.08819100  | -0.94675300 |
|                | C | -1.27276500 | 0.19137300  | 1.49194700  |
|                | C | -3.06131700 | 1.08384800  | -0.05817300 |
|                | C | -2.32923000 | 0.97310000  | 1.20362500  |
|                | H | -3.90545100 | 0.30773600  | -1.82662100 |
|                | H | -0.83690800 | 0.16952200  | 2.48539800  |
|                | H | -3.52514500 | 2.04410800  | -0.25589700 |
|                | H | -2.67686000 | 1.60830200  | 2.01253900  |
|                | N | -2.89196300 | -1.24944700 | -0.78912200 |
|                | N | -0.66230900 | -0.67626800 | 0.51791700  |
|                | B | -1.71330600 | -1.14543700 | -0.22206100 |
|                | C | 1.67152600  | 0.89415800  | -0.41011900 |
|                | C | 1.90900500  | -1.23706100 | 1.79314000  |
|                | H | 1.64435000  | -2.25287700 | 2.09654500  |
|                | H | 2.99662400  | -1.18864200 | 1.68577900  |
|                | H | 1.62735200  | -0.55659100 | 2.60139900  |
|                | C | 1.22767900  | -2.07450000 | -1.10538900 |
|                | H | 0.74279800  | -3.00352400 | -0.79312300 |
|                | H | 0.76576700  | -1.74803300 | -2.04237300 |
|                | H | 2.27670200  | -2.30089000 | -1.31219500 |
|                | C | 3.02498000  | 0.70120900  | -1.09967800 |
|                | H | 2.93518200  | 0.08421500  | -1.99815300 |
|                | H | 3.42937700  | 1.67459000  | -1.40196700 |
|                | H | 3.75924800  | 0.23061100  | -0.43693900 |
|                | C | 0.66691400  | 1.46007800  | -1.41431400 |
|                | H | 0.46843000  | 0.76027500  | -2.23337700 |

|                |    |             |             |             |
|----------------|----|-------------|-------------|-------------|
|                | H  | -0.28827300 | 1.69657200  | -0.93534400 |
|                | H  | 1.05992900  | 2.38379400  | -1.85574700 |
|                | C  | 1.83909100  | 1.87627800  | 0.75026500  |
|                | H  | 2.15022800  | 2.85500900  | 0.36521700  |
|                | H  | 0.90541100  | 2.02053100  | 1.30308100  |
|                | H  | 2.60323200  | 1.53903600  | 1.45643800  |
|                | Si | 1.07807400  | -0.77547100 | 0.20476900  |
| 2●pyridine     | C  | 0.15148100  | 3.06980900  | -0.78180400 |
|                | C  | 0.63179200  | 1.26093800  | 1.66342300  |
|                | C  | 1.01098000  | 3.27543900  | 0.25868900  |
|                | C  | 0.98548700  | 2.55086200  | 1.51406900  |
|                | H  | 0.24976600  | 3.74842100  | -1.63151300 |
|                | H  | 0.60525700  | 0.81659100  | 2.65873800  |
|                | H  | 1.68190600  | 4.12615400  | 0.18873000  |
|                | H  | 1.27700400  | 3.08732200  | 2.41335400  |
|                | N  | -0.89346300 | 2.19573000  | -0.83027500 |
|                | N  | 0.27294000  | 0.41045500  | 0.57877800  |
|                | B  | -0.85063200 | 1.01829600  | -0.14546200 |
|                | C  | 2.73570000  | -0.78558400 | -0.62447100 |
|                | C  | 1.40980300  | -1.96253900 | 1.86617400  |
|                | H  | 0.49225500  | -2.02895400 | 2.45960100  |
|                | H  | 1.76368900  | -2.98184800 | 1.68769600  |
|                | H  | 2.16416300  | -1.45240400 | 2.47251800  |
|                | C  | 0.00407500  | -2.08820900 | -0.86681800 |
|                | H  | -0.82891400 | -2.55347300 | -0.33315700 |
|                | H  | -0.40942500 | -1.47615600 | -1.67518300 |
|                | H  | 0.58598000  | -2.89039700 | -1.33080600 |
|                | C  | 3.53775900  | -2.08575200 | -0.68320900 |
|                | H  | 2.97619800  | -2.89633200 | -1.15923500 |
|                | H  | 4.45543200  | -1.93425700 | -1.26566000 |
|                | H  | 3.83317700  | -2.42060100 | 0.31570700  |
|                | C  | 2.45482800  | -0.29305400 | -2.04458600 |
|                | H  | 1.95761800  | -1.05854000 | -2.64794900 |
|                | H  | 1.82085400  | 0.60171800  | -2.03785500 |
|                | H  | 3.39435000  | -0.03153100 | -2.54772100 |
|                | C  | 3.55584700  | 0.27407800  | 0.11078600  |
|                | H  | 4.53876700  | 0.38230100  | -0.36596600 |
|                | H  | 3.05951200  | 1.24776100  | 0.08065300  |
|                | H  | 3.72471100  | 0.01005200  | 1.16033600  |
|                | Si | 1.09604300  | -1.07718000 | 0.25662700  |
|                | N  | -2.19851100 | 0.21327300  | -0.09373300 |
|                | C  | -3.12162800 | 0.41197500  | -1.05269300 |
|                | C  | -2.44474200 | -0.64778400 | 0.90845800  |
|                | C  | -4.32456700 | -0.26069200 | -1.03864900 |
|                | H  | -2.84528600 | 1.12805000  | -1.81346300 |
|                | C  | -3.63518300 | -1.34026300 | 0.98632700  |
|                | H  | -1.65624700 | -0.75505500 | 1.64149500  |
|                | C  | -4.58955800 | -1.14993400 | -0.00398800 |
|                | H  | -5.04002300 | -0.08601100 | -1.82930500 |
|                | H  | -3.80360100 | -2.01771600 | 1.81104900  |
|                | H  | -5.52780000 | -1.68800500 | 0.02883000  |
| 2●acetonitrile | C  | -0.84950000 | 2.89186200  | -1.01292400 |
|                | C  | -0.10353500 | 1.35997700  | 1.56274600  |
|                | C  | -0.06514400 | 3.31262900  | 0.01872500  |
|                | C  | 0.01562900  | 2.67819200  | 1.32116700  |
|                | H  | -0.85845100 | 3.51748700  | -1.90674100 |
|                | H  | -0.06018200 | 0.99263600  | 2.58729900  |
|                | H  | 0.44930400  | 4.26093900  | -0.10275600 |
|                | H  | 0.19200100  | 3.31813000  | 2.18154600  |
|                | N  | -1.72021000 | 1.83719700  | -1.01141700 |
|                | N  | -0.29023100 | 0.37905400  | 0.54830500  |
|                | B  | -1.46210400 | 0.74010500  | -0.25377100 |

|                |    |             |             |             |
|----------------|----|-------------|-------------|-------------|
|                | C  | 2.29683200  | -0.56041500 | -0.57875700 |
|                | C  | 1.24466900  | -1.57434100 | 2.10638600  |
|                | H  | 0.36754700  | -1.70844800 | 2.74590800  |
|                | H  | 1.76344200  | -2.53554200 | 2.04776400  |
|                | H  | 1.91636600  | -0.86683700 | 2.60086400  |
|                | C  | -0.17953800 | -2.32899700 | -0.50617300 |
|                | H  | -0.96932700 | -2.76460300 | 0.11212100  |
|                | H  | -0.63533300 | -1.94504500 | -1.42379300 |
|                | H  | 0.50169900  | -3.13626000 | -0.79165400 |
|                | C  | 3.30345400  | -1.70936200 | -0.52755900 |
|                | H  | 2.87557000  | -2.64799800 | -0.89459700 |
|                | H  | 4.17304600  | -1.47604500 | -1.15506300 |
|                | H  | 3.66781600  | -1.87895000 | 0.49018700  |
|                | C  | 1.89986500  | -0.29073600 | -2.03035700 |
|                | H  | 1.51768500  | -1.19190600 | -2.51942300 |
|                | H  | 1.12867600  | 0.48631900  | -2.09560600 |
|                | H  | 2.76935400  | 0.05516500  | -2.60346900 |
|                | C  | 2.94298300  | 0.69929000  | -0.00257300 |
|                | H  | 3.86831100  | 0.92784100  | -0.54701600 |
|                | H  | 2.27774700  | 1.56264900  | -0.09454100 |
|                | H  | 3.20232100  | 0.58144600  | 1.05491300  |
|                | Si | 0.75171900  | -0.99802100 | 0.40594700  |
|                | N  | -2.61716200 | -0.28874100 | -0.19558800 |
|                | C  | -3.45432500 | -1.06828600 | -0.14669600 |
|                | C  | -4.49995600 | -2.05493500 | -0.08473600 |
|                | H  | -4.87307900 | -2.11482000 | 0.93749100  |
|                | H  | -5.30722300 | -1.76454800 | -0.75608100 |
|                | H  | -4.09622900 | -3.02167500 | -0.38635200 |
| 2●benzaldehyde | C  | 0.99432400  | 3.18859000  | -0.95702600 |
|                | C  | 0.23851900  | 1.28172700  | 1.36337400  |
|                | C  | 1.19996600  | 3.37036400  | 0.37360500  |
|                | C  | 0.58397200  | 2.57615500  | 1.42714400  |
|                | H  | 1.46440000  | 3.91719900  | -1.62103200 |
|                | H  | -0.26913000 | 0.82714800  | 2.21193100  |
|                | H  | 1.77570100  | 4.23838900  | 0.67882000  |
|                | H  | 0.36286400  | 3.08146400  | 2.36399200  |
|                | N  | 0.22074400  | 2.24180100  | -1.57567700 |
|                | N  | 0.45085600  | 0.41712600  | 0.24567400  |
|                | B  | 0.02579700  | 1.02233300  | -1.01335700 |
|                | C  | 3.08581000  | -0.89608800 | -0.07858900 |
|                | C  | 1.24023500  | -1.50462400 | 2.29386700  |
|                | H  | 0.21370300  | -1.68404700 | 2.62647200  |
|                | H  | 1.81297600  | -2.41805100 | 2.48198400  |
|                | H  | 1.66247200  | -0.71166000 | 2.91563500  |
|                | C  | 0.51605600  | -2.48315800 | -0.47828300 |
|                | H  | -0.55062200 | -2.57629600 | -0.24902200 |
|                | H  | 0.63276100  | -2.38291400 | -1.56059200 |
|                | H  | 0.98994900  | -3.42450300 | -0.18343400 |
|                | C  | 3.78698900  | -2.25434500 | -0.09647200 |
|                | H  | 3.35220800  | -2.92138700 | -0.84681900 |
|                | H  | 4.84825600  | -2.12574200 | -0.34376700 |
|                | H  | 3.73343800  | -2.75726800 | 0.87488600  |
|                | C  | 3.12072000  | -0.29327400 | -1.48374500 |
|                | H  | 2.52862300  | -0.87546100 | -2.19910900 |
|                | H  | 2.74312700  | 0.73377900  | -1.48603400 |
|                | H  | 4.15300600  | -0.26751600 | -1.85511000 |
|                | C  | 3.81603600  | 0.04548500  | 0.87953300  |
|                | H  | 4.83114000  | 0.24441400  | 0.51328900  |
|                | H  | 3.29860600  | 1.00836400  | 0.96423900  |
|                | H  | 3.90293200  | -0.38494900 | 1.88157900  |
|                | Si | 1.29951600  | -1.08952100 | 0.48256100  |
|                | O  | -0.72037600 | 0.03896600  | -1.89578100 |

|  |   |             |             |             |
|--|---|-------------|-------------|-------------|
|  | C | -1.77286400 | -0.62068300 | -1.74921100 |
|  | C | -2.78891000 | -0.42905700 | -0.75935800 |
|  | H | -1.92185400 | -1.42883800 | -2.46674000 |
|  | C | -2.84346000 | 0.69041300  | 0.08668500  |
|  | C | -3.76321600 | -1.43620700 | -0.67060200 |
|  | C | -3.85205400 | 0.77910900  | 1.02521900  |
|  | H | -2.12260700 | 1.49331200  | -0.01049800 |
|  | C | -4.76077400 | -1.34644900 | 0.28315000  |
|  | H | -3.71376800 | -2.28024900 | -1.34931100 |
|  | C | -4.79933800 | -0.24118800 | 1.12886100  |
|  | H | -3.90940500 | 1.64079000  | 1.67694400  |
|  | H | -5.50829100 | -2.12378900 | 0.36739700  |
|  | H | -5.58297000 | -0.16539300 | 1.87259200  |

## References

1. I. R. Dunkin, *Matrix-isolation techniques: a practical approach*, Oxford University Press, 1998.
2. Y. Zhao and D. G. Truhlar, *Theor. Chem. Acc.*, 2008, **120**, 215-241.
3. A. D. Becke, *J. Chem. Phys.*, 1993, **98**, 5648-5652.
4. C. Lee, W. Yang and R. G. Parr, *Phys. Rev. B*, 1988, **37**, 785.
5. S. Grimme, S. Ehrlich and L. Goerigk, *J. Comput. Chem.*, 2011, **32**, 1456-1465.
6. R. Krishnan, J. S. Binkley, R. Seeger and J. A. Pople, *J. Chem. Phys.*, 1980, **72**, 650-654.
7. J. Bloino and V. Barone, *J. Chem. Phys.*, 2012, **136**.
8. V. Barone, M. Biczysko and J. Bloino, *Phys. Chem. Chem. Phys.*, 2014, **16**, 1759-1787.
9. V. Barone, *J. Chem. Phys.*, 2004, **122**.
10. H. P. Hratchian and H. B. Schlegel, *J. Chem. Phys.*, 2004, **120**, 9918-9924.
11. H. Hratchian and H. Schlegel, *J. Chem. Theory Comput.*, 2005, **1**, 61-69.
12. C. Riplinger, B. Sandhoefer, A. Hansen and F. Neese, *J. Chem. Phys.*, 2013, **139**, 134101.
13. C. Riplinger and F. Neese, *J. Chem. Phys.*, 2013, **138**, 034106.
14. D. G. Liakos, Y. Guo and F. Neese, *J. Phys. Chem. A*, 2019, **124**, 90-100.
15. D. E. Woon and T. H. Dunning Jr, *J. Chem. Phys.*, 1993, **98**, 1358-1371.
16. T. H. Dunning Jr, *J. Chem. Phys.*, 1989, **90**, 1007-1023.
17. F. Neese, *Wiley Interdiscip. Rev. Comput. Mol. Sci.*, 2012, **2**, 73-78.
18. M. J. Frisch, G. W. Trucks, H. B. Schlegel, G. E. Scuseria, M. A. Robb, J. R. Cheeseman, G. Scalmani, V. Barone, G. A. Petersson, H. Nakatsuji, X. Li, M. Caricato, A. V. Marenich, J. Bloino, B. G. Janesko, R. Gomperts, B. Mennucci, H. P. Hratchian, J. V. Ortiz, A. F. Izmaylov, J. L. Sonnenberg, Williams, F. Ding, F. Lipparini, F. Egidi, J. Goings, B. Peng, A. Petrone, T. Henderson, D. Ranasinghe, V. G. Zakrzewski, J. Gao, N. Rega, G. Zheng, W. Liang, M. Hada, M. Ehara, K. Toyota, R. Fukuda, J. Hasegawa, M. Ishida, T. Nakajima, Y. Honda, O. Kitao, H. Nakai, T. Vreven, K. Throssell, J. A. Montgomery Jr., J. E. Peralta, F. Ogliaro, M. J. Bearpark, J. J. Heyd, E. N. Brothers, K. N. Kudin, V. N. Staroverov, T. A. Keith, R. Kobayashi, J. Normand, K. Raghavachari, A. P. Rendell, J. C. Burant, S. S. Iyengar, J. Tomasi, M. Cossi, J. M. Millam, M. Klene, C. Adamo, R. Cammi, J. W. Ochterski, R. L. Martin, K. Morokuma, O. Farkas, J. B. Foresman and D. J. Fox, *Journal*, 2016.
19. T. Yanai, D. P. Tew and N. C. Handy, *Chem. Phys. Lett.*, 2004, **393**, 51-57.
20. E. D. Glendening, C. R. Landis and F. Weinhold, *J. Comput. Chem.*, 2013, **34**, 1429-1437.
21. F. Weinhold, *J. Comput. Chem.*, 2012, **33**, 2363-2379.
22. E. Glendening, C. Landis and F. Weinhold, *Wiley Interdiscip. Rev. Comput. Mol. Sci.*, 2012, **2**, 1-42.
23. A. E. Reed, L. A. Curtiss and F. Weinhold, *Chem. Rev.*, 1988, **88**, 899-926.

24. K. Wolinski, J. F. Hinton and P. Pulay, *J. Am. Chem. Soc.*, 1990, **112**, 8251-8260.
25. R. Ditchfield, *Mol. Phys.*, 1974, **27**, 789-807.
26. A. V. Marenich, C. J. Cramer and D. G. Truhlar, *The Journal of Physical Chemistry B*, 2009, **113**, 6378-6396.
27. H. S. Yu, X. He, S. L. Li and D. G. Truhlar, *Chem. Sci.*, 2016, **7**, 5032-5051.
28. F. Weigend and R. Ahlrichs, *Phys. Chem. Chem. Phys.*, 2005, **7**, 3297-3305.
29. R. J. Mayer, N. Hampel and A. R. Ofial, *Chem. Eur. J.*, 2021, **27**, 4070-4080.
30. C. Angeli, R. Cimiraglia and J.-P. Malrieu, *J. Chem. Phys.*, 2002, **117**, 9138-9153.
